# Supplementary material for: Association of first trimester prescription opioid use with congenital malformations in the offspring: population based cohort study
Source: PubMed Central journal article supplement — BMJ. 2021 Feb 10;372:n102. doi: 10.1136/bmj.n102 (PMC7873721; doi:10.1136/bmj.n102), 2021-02-10
Supplement: batb060866.ww.pdf [file batb060866.ww.pdf]

## SUPPLEMENTARY ONLINE CONTENT

### Association of First Trimester Prescription Opioid Use with Congenital Malformations in the Offspring: Population Based Cohort Study

Brian T. Bateman, MD MS; Sonia Hernandez-Diaz, MD DrPH; Loreen Straub, MD SM; Yanmin Zhu, MS PhD;  
Kathryn J. Gray, MD PhD; Rishi J. Desai, MS PhD; Helen Mogun, MS; Nileesa Gautam, BS; Krista F.  
Huybrechts, MS PhD

#### Supplementary Tables

|                                                                                                                                                                 |    |
|-----------------------------------------------------------------------------------------------------------------------------------------------------------------|----|
| eTable 1 Specific Prescription Opioids Considered and Number of Pregnancies Exposed During First Trimester.....                                                 | 2  |
| eTable 2 Definition of Congenital Malformations.....                                                                                                            | 3  |
| eTable 3 Cohort Characteristics of Pregnancies With and Without Exposure to Opioids During the First Trimester (Unadjusted).....                                | 6  |
| eTable 4 Cohort Characteristics of Pregnancies With and Without Exposure to Opioids During the First Trimester (Propensity Score Weighted).....                 | 10 |
| eTable 5 Absolute Risk of Congenital Malformations (Primary Outcomes) Among Infants Born to Mothers With and Without Exposure to Opioids.....                   | 14 |
| eTable 6 Risk of Congenital Malformations (Primary Outcomes) in Infants Following Exposure to Opioids During the First Trimester: Sensitivity Analyses.....     | 15 |
| eTable 7 Risk of Congenital Malformations (Oral Cleft Subgroups) in Infants Following Exposure to Opioids During the First Trimester: Sensitivity Analyses..... | 29 |
| eTable 8 Absolute Risk of Congenital Malformations (Secondary Outcomes) Among Infants Born to Mothers With and Without Exposure to Opioids.....                 | 34 |

#### Supplementary Figures

|                                                                                                                                                                                                                                  |    |
|----------------------------------------------------------------------------------------------------------------------------------------------------------------------------------------------------------------------------------|----|
| eFigure 1 Cohort Selection for Pregnancies in the Medicaid Analytic Extract 2000-2014.....                                                                                                                                       | 36 |
| eFigure 2 Cohort Selection for Pregnancies in the IBM Health MarketScan Research Database 2003-2015. .                                                                                                                           | 37 |
| eFigure 3 Opioid Dispensing Patterns Among Pregnancies With $\geq 2$ Opioid Prescriptions During the First Trimester.....                                                                                                        | 38 |
| eFigure 4 Risk of Congenital Malformations (Oral Cleft Subgroups) in Infants Following Exposure to Opioids During the First Trimester: Main Analyses (Unadjusted and Propensity Score Stratified). ....                          | 39 |
| eFigure 5 Risk of Congenital Malformations (Oral Cleft Subgroups) in Infants Following Exposure to Opioids During the First Trimester: Sensitivity Analyses (Pooled Estimates, Propensity Score Stratified). ....                | 40 |
| eFigure 6 Risk of Congenital Malformations (Oral Cleft Subgroups) in Infants Following Exposure to Opioids During the First Trimester: Subgroup Analyses (Pooled Estimates, Propensity Score Stratified).....                    | 41 |
| eFigure 7 Risk of Congenital Malformations (Secondary Outcomes – Cardiac Malformations) in Infants Following Exposure to Opioids During the First Trimester: Main Analyses (Unadjusted and Propensity Score Stratified).....     | 42 |
| eFigure 8 Risk of Congenital Malformations (Secondary Outcomes – Non-Cardiac Malformations) in Infants Following Exposure to Opioids During the First Trimester: Main Analyses (Unadjusted and Propensity Score Stratified)..... | 43 |

#### Appendix

|                                                                                                 |    |
|-------------------------------------------------------------------------------------------------|----|
| Appendix 1 Cohort Selection.....                                                                | 44 |
| Appendix 2 Validation Study Description and Results.....                                        | 45 |
| Appendix 3 Quantifying the Potential Effect of Restriction to Live Births.....                  | 46 |
| Appendix 4 Sensitivity Analysis of Residual Confounding to Explain Increase in Oral Clefts..... | 50 |

#### References

*eTable 1 Specific Prescription Opioids Considered and Number of Pregnancies Exposed During First Trimester.*

| <b>Specific Opioid</b> | <b>MAX 2000-2014</b>                                                            | <b>MarketScan 2003-2015</b> |
|------------------------|---------------------------------------------------------------------------------|-----------------------------|
|                        | <b>N Pregnancies with <math>\geq 1</math> Dispensing During First Trimester</b> |                             |
| Butorphanol            | 140                                                                             | 85                          |
| Codeine                | 22707                                                                           | 3657                        |
| Dihydrocodeine         | 264                                                                             | 13                          |
| Fentanyl               | 394                                                                             | 129                         |
| Hydrocodone            | 50605                                                                           | 8543                        |
| Hydromorphone          | 530                                                                             | 170                         |
| Levorphanol            | <11*                                                                            | 1                           |
| Meperidine             | 377                                                                             | 113                         |
| Methadone              | 606                                                                             | 117                         |
| Morphine               | 700                                                                             | 147                         |
| Oxycodone              | 13800                                                                           | 2826                        |
| Oxymorphone            | 78                                                                              | 34                          |
| Pentazocine            | 135                                                                             | 18                          |
| Propoxyphene           | 7239                                                                            | 1195                        |
| Tapentadol             | 32                                                                              | 41                          |
| Tramadol               | 11179                                                                           | 1695                        |

\*Cell size <11 for MAX cohort. Numbers suppressed in accord with the CMS cell size suppression policy.  
Abbreviation: N, number.

eTable 2 Definition of Congenital Malformations.

| <b>Malformation Group</b> | <b>Malformation Subgroup</b>                       | <b>ICD-9 Dx Code</b>                                                                         |
|---------------------------|----------------------------------------------------|----------------------------------------------------------------------------------------------|
| Cardiovascular Anomalies  | Conotruncal Defects                                | 745.0x, 745.1x, 745.2x                                                                       |
|                           | Single Ventricle                                   | 745.3x                                                                                       |
|                           | Ventricular Septal Defect                          | 745.4x                                                                                       |
|                           | Secundum Atrial Septal Defect/Patent Foramen Ovale | 745.5x AND no preterm                                                                        |
|                           | Atrioventricular Septal Defect                     | 745.6x                                                                                       |
|                           | Right Sided Defects                                | 746.00, 746.01, 746.09, 746.1x, 746.2x, 746.83, 747.3x AND no preterm, 746.02 AND no preterm |
|                           | Left Sided Defects                                 | 747.1x, 747.2x, 746.3x, 746.5x, 746.7x, 746.81, 746.82, 746.84                               |
|                           | Patent Ductus Arteriosus                           | 747.0x AND no preterm                                                                        |
|                           | Persistent Pulmonary Hypertension of the Newborn   | (416.0x or 747.83) AND no preterm                                                            |
|                           | Anomalous Pulmonary Venous Return                  | 747.4x                                                                                       |
|                           | Other Cardiac Malformation                         | 745.7x, 745.8x, 746.8, 746.85-746.87, 746.89                                                 |
|                           | Cardiac Malformation NOS                           | 745, 745.9, 746, 746.9x (exclude if only 746.99), 747                                        |
| Central Nervous System    | Overall                                            | 740.xx-742.xx                                                                                |
|                           | Microcephaly                                       | 742.1x                                                                                       |
|                           | Hydrocephaly                                       | 742.3x                                                                                       |
|                           | Reduction Deformities of Brain                     | 742.2x                                                                                       |
|                           | Neural tube Defects                                | 741.xx, 756.17, 740.0x, 740.2x, 742.0x                                                       |
| Club Foot                 |                                                    | 754.50, 754.51, 754.59, 754.60, 754.62, 754.69, 754.70, 754.71, 754.79                       |
| Gastroschisis             |                                                    | 756.73 if coded after 9/2009;                                                                |
|                           |                                                    | 756.79 AND ICD-9 Proc 54.71 if coded before 10/2009                                          |
| Oral Cleft                | Cleft Palate                                       | 749.0x                                                                                       |
|                           | Cleft Lip                                          | 749.1x                                                                                       |
|                           | Cleft Palate with Cleft Lip                        | 749.2x                                                                                       |
| Eye Anomalies             |                                                    | 743.xx (exclude if only 743.6x and 743.8x)                                                   |
| Ear Anomalies             |                                                    | 744.xx (exclude if only 744.1x, 744.21, 744.29, and 744.4x-744.9x)                           |

| Malformation Group                     | Malformation Subgroup | ICD-9 Dx Code                                                                    |
|----------------------------------------|-----------------------|----------------------------------------------------------------------------------|
| Other Vascular (Non-Cardiac) Anomalies |                       | 747.6x-747.9x (exclude if only 747.83)                                           |
| Respiratory Anomalies                  |                       | 748.xx (exclude if only 748.1x)                                                  |
| Gastrointestinal Anomalies             |                       | 750.xx-751.xx (exclude if only 750.0x, 750.1x, 750.50, 751.0x)                   |
| Genital (Male and Female) Anomalies    |                       | 752.xx (exclude if only 752.42, 752.52) (in addition, exclude 752.5x if preterm) |
| Urinary Anomalies                      |                       | 753.xx (exclude if only 753.7x)                                                  |
| Musculoskeletal Anomalies              |                       | 754.xx and 756.xx (exclude if only 754.3x, 754.81, 754.82, 756.2x)               |
| Limb Defects                           |                       | 755.xx (exclude if only 755.65)                                                  |
| Other Anomalies                        |                       | 757.xx; 759.xx (exclude if only 757.2-757.6, 759.81-759.83)                      |

Abbreviations: Dx, diagnosis; Proc, procedure; NOS, not otherwise specified.

Consider claims in infant record between date of birth (DoB) and DoB+90 days and/or in the maternal record between delivery and delivery+30 days, using both in- and out-patient data.

#### Subgroups of Cardiovascular Malformations:

- If there are  $\geq 2$  dates with a code for a malformation within the group
  - Exception: Codes 747.3x, 746.02, 745.5x, 747.0x require  $\geq 2$  dates with a code for a malformation of which at least one code is documented at  $\geq 6$  weeks after DoB
- $\geq 1$  date with a code for a malformation within the subgroup and cardiac procedure
  - Exception: Code 746.02
- $\geq 1$  date with a code for a malformation within the subgroup and infant died
- If codes identified in the maternal record between LMP and LMP+105 AND there are no codes in the infant record between DoB and DoB+90 days (i.e., only maternal codes between delivery and delivery+30), the defect is considered a pre-existing maternal defect.

#### Cardiovascular Malformations overall:

- Any of the subgroups of cardiovascular anomalies is present
- $\geq 2$  dates with a code for any of the cardiac malformations (regardless of the subgroup [1])
- $\geq 1$  date with a code for any of the cardiac malformations [1] and cardiac procedure
- $\geq 1$  date with a code for any of the cardiac malformations [1] and infant died
- If codes identified in the maternal record between LMP and LMP+105 AND there are no codes in the infant record between DoB and DoB+90 days (i.e., only maternal codes between delivery and delivery+30), the defect is considered a pre-existing maternal defect.

#### Specific Non-Cardiovascular Malformations:

- $\geq 2$  dates with a code for the malformation group/subgroup

- Exception: for gastroschisis: if code 756.79 was used (before 10/2009), require  $\geq 1$  date with a code AND ICD-9 Proc 54.71
- $\geq 1$  date with a code for the malformation group/subgroup and malformation-specific procedure
- $\geq 1$  date with a code for the malformation group/subgroup and infant died
- If codes identified in the maternal record between LMP and LMP+105 AND there are no codes in the infant record between DoB and DoB+90 days (i.e., only maternal codes between delivery and delivery+30), the defect is considered a pre-existing maternal defect.

**Any Congenital Malformation:**

- Any of the malformation groups/subgroups mentioned above is present.

[1] the following codes should not be considered: 745.4x, 745.5x, 747.0x, 746.4x, 746.6x, 746.99, 747.3x if preterm, 746.02 if preterm, 747.5x, 416.0x if preterm, 747.83 if preterm, 746.08, 746.105

eTable 3 Cohort Characteristics of Pregnancies With and Without Exposure to Opioids During the First Trimester (Unadjusted).

|                                             | MAX 2000-2014 |       |           |       |        | MarketScan 2003-2015 |       |           |       |        |
|---------------------------------------------|---------------|-------|-----------|-------|--------|----------------------|-------|-----------|-------|--------|
|                                             | Exposed       |       | Unexposed |       | Stdiff | Exposed              |       | Unexposed |       | Stdiff |
|                                             | N/Mean        | %/SD  | N/Mean    | %/SD  |        | N/Mean               | %/SD  | N/Mean    | %/SD  |        |
| Total                                       | 70,447        |       | 1,532,133 |       |        | 12,454               |       | 1,165,222 |       |        |
| Age, mean (SD)                              | 26.03         | 5.46  | 24.27     | 5.98  | 0.31   | 32.00                | 4.85  | 31.97     | 4.60  | 0.01   |
| Year of delivery, N (%)                     |               |       |           |       |        |                      |       |           |       |        |
| 2000-2002                                   | 5,234         | 7.43  | 162,483   | 10.61 | -0.11  | *                    | *     | *         | *     | *      |
| 2003-2005                                   | 15,707        | 22.30 | 372,573   | 24.31 | -0.05  | 1,221                | 9.80  | 112,153   | 9.63  | 0.01   |
| 2006-2010                                   | 30,531        | 43.33 | 617,713   | 40.32 | 0.06   | 5,724                | 45.96 | 485,901   | 41.70 | 0.09   |
| 2011-2015**                                 | 18,975        | 26.93 | 379,364   | 24.76 | 0.05   | 5,509                | 44.23 | 567,168   | 48.68 | -0.09  |
| Race/Ethnicity, N (%)                       |               |       |           |       |        |                      |       |           |       |        |
| White                                       | 45,328        | 64.34 | 543,765   | 35.49 | 0.60   | *                    | *     | *         | *     | *      |
| Black                                       | 15,045        | 21.36 | 510,311   | 33.31 | -0.27  | *                    | *     | *         | *     | *      |
| Hispanic                                    | 5,169         | 7.34  | 267,363   | 17.45 | -0.31  | *                    | *     | *         | *     | *      |
| Other or unknown                            | 4,905         | 6.96  | 210,694   | 13.74 | -0.22  | *                    | *     | *         | *     | *      |
| Opioid indications, N (%)                   |               |       |           |       |        |                      |       |           |       |        |
| Abdominal pain                              | 27,837        | 39.51 | 235,467   | 15.37 | 0.56   | 3,049                | 24.48 | 68,916    | 5.91  | 0.54   |
| Back/neck pain                              | 29,198        | 41.45 | 88,306    | 5.76  | 0.93   | 4,546                | 36.50 | 102,311   | 8.78  | 0.70   |
| Dental problems                             | 11,710        | 16.62 | 22,213    | 1.45  | 0.55   | 221                  | 1.77  | 747       | 0.06  | 0.18   |
| Fibromyalgia                                | 3,385         | 4.81  | 7,978     | 0.52  | 0.27   | 780                  | 6.26  | 11,189    | 0.96  | 0.29   |
| Joint pain                                  | 12,318        | 17.49 | 40,329    | 2.63  | 0.51   | 1,638                | 13.15 | 30,585    | 2.62  | 0.40   |
| Migraine/headache                           | 16,812        | 23.86 | 77,038    | 5.03  | 0.56   | 2,863                | 22.99 | 38,511    | 3.31  | 0.61   |
| Orthopedic injury                           | 16,459        | 23.36 | 58,530    | 3.82  | 0.59   | 1,943                | 15.60 | 41,969    | 3.60  | 0.42   |
| Surgery                                     | 6,663         | 9.46  | 19,656    | 1.28  | 0.37   | 1,374                | 11.03 | 7,381     | 0.63  | 0.46   |
| Arthritis/arthropathy, musculoskeletal pain | 22,291        | 31.64 | 93,620    | 6.11  | 0.69   | 3,276                | 26.30 | 79,745    | 6.84  | 0.54   |
| Complex regional pain syndrome              | 86            | 0.12  | 57        | 0.00  | 0.05   | 29                   | 0.23  | 87        | 0.01  | 0.07   |
| Cough                                       | 5,204         | 7.39  | 29,378    | 1.92  | 0.26   | 702                  | 5.64  | 17,901    | 1.54  | 0.22   |
| Generalized pain                            | 425           | 0.60  | 1,370     | 0.09  | 0.09   | 62                   | 0.50  | 520       | 0.04  | 0.09   |
| Gout                                        | 74            | 0.11  | 242       | 0.02  | 0.04   | 22                   | 0.18  | 248       | 0.02  | 0.05   |
| Infection                                   | 8,129         | 11.54 | 95,451    | 6.23  | 0.19   | 695                  | 5.58  | 31,791    | 2.73  | 0.14   |

|                                       | <i>MAX 2000-2014</i> |             |                  |             |               | <i>MarketScan 2003-2015</i> |             |                  |             |               |
|---------------------------------------|----------------------|-------------|------------------|-------------|---------------|-----------------------------|-------------|------------------|-------------|---------------|
|                                       | <b>Exposed</b>       |             | <b>Unexposed</b> |             | <b>Stdiff</b> | <b>Exposed</b>              |             | <b>Unexposed</b> |             | <b>Stdiff</b> |
|                                       | <b>N/Mean</b>        | <b>%/SD</b> | <b>N/Mean</b>    | <b>%/SD</b> |               | <b>N/Mean</b>               | <b>%/SD</b> | <b>N/Mean</b>    | <b>%/SD</b> |               |
| Osteoarthritis                        | 1,494                | 2.12        | 2,188            | 0.14        | 0.19          | 236                         | 1.89        | 2,185            | 0.19        | 0.17          |
| Other neuropathies                    | 6,647                | 9.44        | 9,943            | 0.65        | 0.41          | 1,526                       | 12.25       | 19,494           | 1.67        | 0.42          |
| Other pain                            | 3,881                | 5.51        | 2,932            | 0.19        | 0.32          | 591                         | 4.75        | 1,257            | 0.11        | 0.30          |
| Pain related to psychological factors | 123                  | 0.17        | 172              | 0.01        | 0.05          | 21                          | 0.17        | 55               | 0.00        | 0.06          |
| Peripheral neuropathy                 | 30                   | 0.04        | 76               | 0.00        | 0.02          | 9                           | 0.07        | 80               | 0.01        | 0.03          |
| Post herpetic neuralgia               | 13                   | 0.02        | 18               | 0.00        | 0.02          | 10                          | 0.08        | 26               | 0.00        | 0.04          |
| Rheumatoid arthritis                  | 331                  | 0.47        | 1,028            | 0.07        | 0.08          | 108                         | 0.87        | 1,743            | 0.15        | 0.10          |
| Sciatica                              | 1,611                | 2.29        | 1,820            | 0.12        | 0.20          | 333                         | 2.67        | 3,950            | 0.34        | 0.19          |
| Sickle cell disease                   | 372                  | 0.53        | 941              | 0.06        | 0.09          | 21                          | 0.17        | 153              | 0.01        | 0.05          |
| Trigeminal neuralgia                  | 50                   | 0.07        | 82               | 0.01        | 0.03          | 23                          | 0.18        | 132              | 0.01        | 0.06          |
| Urinary calculus                      | 2,275                | 3.23        | 3,741            | 0.24        | 0.23          | 495                         | 3.97        | 3,252            | 0.28        | 0.26          |
| Maternal conditions, N (%)            |                      |             |                  |             |               |                             |             |                  |             |               |
| Anxiety                               | 9,468                | 13.44       | 43,165           | 2.82        | 0.40          | 1,199                       | 9.63        | 32,346           | 2.78        | 0.29          |
| Depression                            | 10,911               | 15.49       | 76,216           | 4.97        | 0.35          | 1,470                       | 11.80       | 41,210           | 3.54        | 0.31          |
| Diabetes                              | 2,478                | 3.52        | 21,350           | 1.39        | 0.14          | 340                         | 2.73        | 13,374           | 1.15        | 0.11          |
| Hypertension                          | 4,518                | 6.41        | 27,597           | 1.80        | 0.23          | 835                         | 6.70        | 23,801           | 2.04        | 0.23          |
| Alcohol abuse or dependence           | 978                  | 1.39        | 9,101            | 0.59        | 0.08          | 46                          | 0.37        | 776              | 0.07        | 0.06          |
| Amphetamine abuse or dependence       | 286                  | 0.41        | 2,872            | 0.19        | 0.04          | 3                           | 0.02        | 56               | 0.00        | 0.02          |
| Cocaine abuse or dependence           | 347                  | 0.49        | 2,639            | 0.17        | 0.06          | 2                           | 0.02        | 46               | 0.00        | 0.01          |
| Hallucinogen abuse or dependence      | <11***               | 0.01        | 108              | 0.01        | 0.00          | 0                           | 0.00        | 5                | 0.00        | 0.00          |
| Infertility                           | 404                  | 0.57        | 5,928            | 0.39        | 0.03          | 1,266                       | 10.17       | 83,644           | 7.18        | 0.11          |
| Marijuana abuse or dependence         | 730                  | 1.04        | 9,286            | 0.61        | 0.05          | 10                          | 0.08        | 151              | 0.01        | 0.03          |
| Obesity or overweight                 | 3,243                | 4.60        | 30,634           | 2.00        | 0.15          | 495                         | 3.97        | 17,998           | 1.54        | 0.15          |
| Posttraumatic stress disorder         | 1,128                | 1.60        | 7,532            | 0.49        | 0.11          | 72                          | 0.58        | 1,457            | 0.13        | 0.08          |
| Renal disease                         | 207                  | 0.29        | 1,268            | 0.08        | 0.05          | 89                          | 0.71        | 1,899            | 0.16        | 0.08          |
| Sarcoidosis                           | 44                   | 0.06        | 159              | 0.01        | 0.03          | 2                           | 0.02        | 153              | 0.01        | 0.00          |
| Sedative hypnotic use disorder        | 90                   | 0.13        | 194              | 0.01        | 0.04          | 5                           | 0.04        | 34               | 0.00        | 0.03          |
| Sleep disorder                        | 2,273                | 3.23        | 7,528            | 0.49        | 0.20          | 551                         | 4.42        | 8,497            | 0.73        | 0.23          |

|                                           | <b>MAX 2000-2014</b> |             |                  |             |               | <b>MarketScan 2003-2015</b> |             |                  |             |               |
|-------------------------------------------|----------------------|-------------|------------------|-------------|---------------|-----------------------------|-------------|------------------|-------------|---------------|
|                                           | <b>Exposed</b>       |             | <b>Unexposed</b> |             | <b>Stdiff</b> | <b>Exposed</b>              |             | <b>Unexposed</b> |             | <b>Stdiff</b> |
|                                           | <b>N/Mean</b>        | <b>%/SD</b> | <b>N/Mean</b>    | <b>%/SD</b> |               | <b>N/Mean</b>               | <b>%/SD</b> | <b>N/Mean</b>    | <b>%/SD</b> |               |
| Tobacco use                               | 9,021                | 12.81       | 33,936           | 2.21        | 0.41          | 617                         | 4.95        | 5,627            | 0.48        | 0.28          |
| Concomitant medications, N (%)            |                      |             |                  |             |               |                             |             |                  |             |               |
| Antidepressants                           | 21,233               | 30.14       | 98,446           | 6.43        | 0.64          | 3,712                       | 29.81       | 77,348           | 6.64        | 0.63          |
| Antiemetics                               | 27,570               | 39.14       | 215,914          | 14.09       | 0.59          | 5,504                       | 44.19       | 187,701          | 16.11       | 0.64          |
| Antihypertensives                         | 6,192                | 8.79        | 32,567           | 2.13        | 0.30          | 1,316                       | 10.57       | 30,810           | 2.64        | 0.32          |
| Benzodiazepines                           | 14,600               | 20.72       | 24,985           | 1.63        | 0.64          | 2,971                       | 23.86       | 31,726           | 2.72        | 0.66          |
| Anti-diabetics                            | 1,402                | 1.99        | 11,593           | 0.76        | 0.11          | 558                         | 4.48        | 26,712           | 2.29        | 0.12          |
| Insulin                                   | 1,293                | 1.84        | 11,102           | 0.72        | 0.10          | 265                         | 2.13        | 10,382           | 0.89        | 0.10          |
| Psychostimulants                          | 1,850                | 2.63        | 8,038            | 0.52        | 0.17          | 527                         | 4.23        | 7,721            | 0.66        | 0.23          |
| Suspected teratogens                      | 16,477               | 23.39       | 137,941          | 9.00        | 0.40          | 2,098                       | 16.85       | 79,845           | 6.85        | 0.31          |
| Antibiotics                               | 53,457               | 75.88       | 584,656          | 38.16       | 0.82          | 8,406                       | 67.50       | 376,602          | 32.32       | 0.75          |
| Anticonvulsants                           | 7,619                | 10.82       | 20,697           | 1.35        | 0.40          | 1,308                       | 10.50       | 9,310            | 0.80        | 0.43          |
| Anxiolytics                               | 1,442                | 2.05        | 4,009            | 0.26        | 0.17          | 159                         | 1.28        | 2,146            | 0.18        | 0.13          |
| Atypical antipsychotics                   | 217                  | 0.31        | 952              | 0.06        | 0.06          | 16                          | 0.13        | 150              | 0.01        | 0.04          |
| Barbiturates                              | 3,906                | 5.54        | 10,436           | 0.68        | 0.28          | 1,183                       | 9.50        | 9,390            | 0.81        | 0.40          |
| Clomiphene                                | 13                   | 0.02        | 123              | 0.01        | 0.01          | 384                         | 3.08        | 28,456           | 2.44        | 0.04          |
| Corticosteroids                           | 17,818               | 25.29       | 148,555          | 9.70        | 0.42          | 3,760                       | 30.19       | 136,787          | 11.74       | 0.47          |
| Folate Supplementation                    | 37,659               | 53.46       | 679,575          | 44.35       | 0.18          | 4,885                       | 39.22       | 402,624          | 34.55       | 0.10          |
| Gonadotropin                              | <11***               | 0.00        | 15               | 0.00        | 0.00          | 569                         | 4.57        | 25,009           | 2.15        | 0.13          |
| Mood stabilizers                          | 3,665                | 5.20        | 14,233           | 0.93        | 0.25          | 684                         | 5.49        | 6,800            | 0.58        | 0.29          |
| Other hypnotics                           | 8,736                | 12.40       | 41,482           | 2.71        | 0.37          | 1,669                       | 13.40       | 16,123           | 1.38        | 0.47          |
| Progestins                                | 5,146                | 7.30        | 63,988           | 4.18        | 0.13          | 2,261                       | 18.15       | 140,325          | 12.04       | 0.17          |
| Triptans                                  | 3,604                | 5.12        | 10,322           | 0.67        | 0.27          | 1,181                       | 9.48        | 11,460           | 0.98        | 0.39          |
| Typical antipsychotics                    | 3,267                | 4.64        | 14,921           | 0.97        | 0.22          | 212                         | 1.70        | 1,952            | 0.17        | 0.16          |
| General markers of comorbidity, mean (SD) |                      |             |                  |             |               |                             |             |                  |             |               |
| Obstetric comorbidity index               | 0.52                 | 0.97        | 0.24             | 0.64        | 0.34          | 0.72                        | 1.04        | 0.49             | 0.82        | 0.25          |
| N distinct non-opioid prescription drugs  | 3.82                 | 3.49        | 1.12             | 1.79        | 0.97          | 3.70                        | 3.43        | 1.20             | 1.82        | 0.91          |



|                           | <i>MAX 2000-2014</i> |             |                  |             |              | <i>MarketScan 2003-2015</i> |             |                  |             |              |
|---------------------------|----------------------|-------------|------------------|-------------|--------------|-----------------------------|-------------|------------------|-------------|--------------|
|                           | <b>Exposed</b>       |             | <b>Unexposed</b> |             | <b>Stdif</b> | <b>Exposed</b>              |             | <b>Unexposed</b> |             | <b>Stdif</b> |
|                           | <b>N/Mean</b>        | <b>%/SD</b> | <b>N/Mean</b>    | <b>%/SD</b> |              | <b>N/Mean</b>               | <b>%/SD</b> | <b>N/Mean</b>    | <b>%/SD</b> |              |
| N distinct diagnoses      | 5.55                 | 4.81        | 2.08             | 2.62        | 0.90         | 4.28                        | 4.07        | 1.87             | 2.35        | 0.72         |
| N emergency room visits   | 0.96                 | 1.73        | 0.20             | 0.61        | 0.59         | 0.24                        | 0.80        | 0.03             | 0.23        | 0.35         |
| N hospitalizations        | 0.07                 | 0.32        | 0.03             | 0.18        | 0.18         | 0.03                        | 0.19        | 0.00             | 0.06        | 0.19         |
| N outpatient visits       | 4.26                 | 4.87        | 1.55             | 2.92        | 0.67         | 4.05                        | 4.44        | 1.85             | 2.98        | 0.58         |
| Multiple gestation, N (%) | 1,142                | 1.62        | 19,645           | 1.28        | 0.03         | 435                         | 3.49        | 22,949           | 1.97        | 0.09         |
| Multiparity, N (%)        | 57,309               | 81.35       | 1,087,559        | 70.98       | 0.25         | *                           | *           | *                | *           | *            |

\* Information not available for MarketScan.

\*\* 2011-2014 for MAX.

\*\*\* Cell size <11 for MAX cohort. Numbers suppressed in accord with the CMS cell size suppression policy.

Abbreviations: N, number; SD, standard deviation; Stdif, standardized difference.

eTable 4 Cohort Characteristics of Pregnancies With and Without Exposure to Opioids During the First Trimester (Propensity Score Weighted).

|                                             | MAX 2000-2014 |       |           |       |        | MarketScan 2003-2015 |       |           |       |        |
|---------------------------------------------|---------------|-------|-----------|-------|--------|----------------------|-------|-----------|-------|--------|
|                                             | Exposed       |       | Unexposed |       | Stdiff | Exposed              |       | Unexposed |       | Stdiff |
|                                             | N/Mean        | %/SD  | N/Mean    | %/SD  |        | N/Mean               | %/SD  | N/Mean    | %/SD  |        |
| Total                                       | 70,074        |       | 1,532,118 |       |        | 12,430               |       | 1,152,470 |       |        |
| Age, mean (SD)                              | 26.02         | 5.47  | 25.90     | 5.59  | 0.02   | 32.00                | 32.08 | 4.85      | 4.92  | -0.02  |
| Year of delivery, N (%)                     |               |       |           |       |        |                      |       |           |       |        |
| 2000-2002                                   | 5,228         | 7.46  | 120,720   | 7.88  | -0.02  | *                    | *     | *         | *     | *      |
| 2003-2005                                   | 15,660        | 22.35 | 352,505   | 23.01 | -0.02  | 1,221                | 9.82  | 112,208   | 9.74  | 0.00   |
| 2006-2010                                   | 30,351        | 43.32 | 637,860   | 41.63 | 0.03   | 5,715                | 45.98 | 528,656   | 45.88 | 0.00   |
| 2011-2015**                                 | 18,835        | 26.87 | 421,033   | 27.47 | -0.01  | 5,494                | 44.19 | 511,606   | 44.40 | 0.00   |
| Race/Ethnicity, N (%)                       |               |       |           |       |        |                      |       |           |       |        |
| White                                       | 45,015        | 64.24 | 984,729   | 64.27 | 0.00   | *                    | *     | *         | *     | *      |
| Black                                       | 15,015        | 21.43 | 330,963   | 21.60 | 0.00   | *                    | *     | *         | *     | *      |
| Hispanic                                    | 5,160         | 7.36  | 111,896   | 7.30  | 0.00   | *                    | *     | *         | *     | *      |
| Other or unknown                            | 4,884         | 6.96  | 104,530   | 6.82  | 0.01   | *                    | *     | *         | *     | *      |
| Opioid indications, N (%)                   |               |       |           |       |        |                      |       |           |       |        |
| Abdominal pain                              | 27,543        | 39.31 | 624,298   | 40.75 | -0.03  | 3,030                | 24.38 | 283,167   | 24.57 | 0.00   |
| Back/neck pain                              | 28,850        | 41.17 | 629,888   | 41.11 | 0.00   | 4,523                | 36.39 | 434,201   | 37.68 | -0.03  |
| Dental problems                             | 11,460        | 16.35 | 253,711   | 16.56 | -0.01  | 216                  | 1.74  | 19,924    | 1.73  | 0.00   |
| Fibromyalgia                                | 3,282         | 4.68  | 77,678    | 5.07  | -0.02  | 775                  | 6.23  | 78,666    | 6.83  | -0.02  |
| Joint pain                                  | 12,093        | 17.26 | 270,883   | 17.68 | -0.01  | 1,626                | 13.08 | 151,651   | 13.16 | 0.00   |
| Migraine/headache                           | 16,556        | 23.63 | 385,438   | 25.16 | -0.04  | 2,843                | 22.87 | 277,320   | 24.06 | -0.03  |
| Orthopedic injury                           | 16,196        | 23.11 | 353,848   | 23.10 | 0.00   | 1,925                | 15.49 | 178,014   | 15.45 | 0.00   |
| Surgery                                     | 6,475         | 9.24  | 134,270   | 8.76  | 0.02   | 1,359                | 10.93 | 117,529   | 10.20 | 0.02   |
| Arthritis/arthropathy, musculoskeletal pain | 21,962        | 31.34 | 492,131   | 32.12 | -0.02  | 3,256                | 26.19 | 306,259   | 26.57 | -0.01  |
| Complex regional pain syndrome              | 83            | 0.12  | 688       | 0.04  | 0.03   | 28                   | 0.23  | 3,417     | 0.30  | -0.01  |
| Cough                                       | 5,105         | 7.29  | 117,633   | 7.68  | -0.01  | 695                  | 5.59  | 65,961    | 5.72  | -0.01  |
| Generalized pain                            | 411           | 0.59  | 8,404     | 0.55  | 0.01   | 60                   | 0.48  | 6,076     | 0.53  | -0.01  |
| Gout                                        | 74            | 0.11  | 1,970     | 0.13  | -0.01  | 22                   | 0.18  | 1,918     | 0.17  | 0.00   |
| Infection                                   | 8,046         | 11.48 | 169,850   | 11.09 | 0.01   | 693                  | 5.58  | 63,843    | 5.54  | 0.00   |

|                                       | <i>MAX 2000-2014</i> |       |           |       |        | <i>MarketScan 2003-2015</i> |       |           |       |        |
|---------------------------------------|----------------------|-------|-----------|-------|--------|-----------------------------|-------|-----------|-------|--------|
|                                       | Exposed              |       | Unexposed |       | Stdiff | Exposed                     |       | Unexposed |       | Stdiff |
|                                       | N/Mean               | %/SD  | N/Mean    | %/SD  |        | N/Mean                      | %/SD  | N/Mean    | %/SD  |        |
| Osteoarthritis                        | 1,452                | 2.07  | 34,518    | 2.25  | -0.01  | 235                         | 1.89  | 20,004    | 1.74  | 0.01   |
| Other neuropathies                    | 6,465                | 9.23  | 137,277   | 8.96  | 0.01   | 1,515                       | 12.19 | 141,811   | 12.30 | 0.00   |
| Other pain                            | 3,675                | 5.24  | 75,665    | 4.94  | 0.01   | 572                         | 4.60  | 51,010    | 4.43  | 0.01   |
| Pain related to psychological factors | 113                  | 0.16  | 2,770     | 0.18  | 0.00   | 21                          | 0.17  | 1,381     | 0.12  | 0.01   |
| Peripheral neuropathy                 | 29                   | 0.04  | 915       | 0.06  | -0.01  | 9                           | 0.07  | 823       | 0.07  | 0.00   |
| Post herpetic neuralgia               | 12                   | 0.02  | 86        | 0.01  | 0.01   | 10                          | 0.08  | 1,612     | 0.14  | -0.02  |
| Rheumatoid arthritis                  | 324                  | 0.46  | 5,953     | 0.39  | 0.01   | 105                         | 0.84  | 8,952     | 0.78  | 0.01   |
| Sciatica                              | 1,549                | 2.21  | 31,840    | 2.08  | 0.01   | 330                         | 2.65  | 29,034    | 2.52  | 0.01   |
| Sickle cell disease                   | 369                  | 0.53  | 7,071     | 0.46  | 0.01   | 20                          | 0.16  | 1,875     | 0.16  | 0.00   |
| Trigeminal neuralgia                  | 47                   | 0.07  | 2,201     | 0.14  | -0.02  | 23                          | 0.19  | 2,886     | 0.25  | -0.01  |
| Urinary calculus                      | 2,196                | 3.13  | 44,039    | 2.87  | 0.02   | 490                         | 3.94  | 40,409    | 3.51  | 0.02   |
| Maternal conditions, N (%)            |                      |       |           |       |        |                             |       |           |       |        |
| Anxiety                               | 9,324                | 13.31 | 207,851   | 13.57 | -0.01  | 1,188                       | 9.56  | 112,635   | 9.77  | -0.01  |
| Depression                            | 10,783               | 15.39 | 253,206   | 16.53 | -0.03  | 1,457                       | 11.72 | 139,548   | 12.11 | -0.01  |
| Diabetes                              | 2,452                | 3.50  | 56,264    | 3.67  | -0.01  | 339                         | 2.73  | 31,067    | 2.70  | 0.00   |
| Hypertension                          | 4,439                | 6.33  | 98,368    | 6.42  | 0.00   | 825                         | 6.64  | 75,969    | 6.59  | 0.00   |
| Alcohol abuse or dependence           | 965                  | 1.38  | 23,362    | 1.52  | -0.01  | 46                          | 0.37  | 3,564     | 0.31  | 0.01   |
| Amphetamine abuse or dependence       | 280                  | 0.40  | 5,570     | 0.36  | 0.01   | 3                           | 0.02  | 459       | 0.04  | -0.01  |
| Cocaine abuse or dependence           | 343                  | 0.49  | 9,220     | 0.60  | -0.02  | 2                           | 0.02  | 140       | 0.01  | 0.00   |
| Hallucinogen abuse or dependence      | <11***               | 0.01  | 108       | 0.01  | 0.00   | 0                           | 0.00  | 0         | 0.00  | .      |
| Infertility                           | 400                  | 0.57  | 8,629     | 0.56  | 0.00   | 1,263                       | 10.16 | 124,926   | 10.84 | -0.02  |
| Marijuana abuse or dependence         | 723                  | 1.03  | 17,245    | 1.13  | -0.01  | 10                          | 0.08  | 673       | 0.06  | 0.01   |
| Obesity or overweight                 | 3,201                | 4.57  | 71,156    | 4.64  | 0.00   | 489                         | 3.93  | 46,009    | 3.99  | 0.00   |
| Posttraumatic stress disorder         | 1,111                | 1.59  | 27,166    | 1.77  | -0.01  | 70                          | 0.56  | 8,455     | 0.73  | -0.02  |
| Renal disease                         | 203                  | 0.29  | 4,776     | 0.31  | 0.00   | 87                          | 0.70  | 7,970     | 0.69  | 0.00   |
| Sarcoidosis                           | 43                   | 0.06  | 1,283     | 0.08  | -0.01  | 2                           | 0.02  | 190       | 0.02  | 0.00   |
| Sedative hypnotic use disorder        | 86                   | 0.12  | 1,736     | 0.11  | 0.00   | 5                           | 0.04  | 309       | 0.03  | 0.01   |
| Sleep disorder                        | 2,230                | 3.18  | 55,395    | 3.62  | -0.02  | 549                         | 4.42  | 50,604    | 4.39  | 0.00   |

|                                           | <b>MAX 2000-2014</b> |             |                  |             |                | <b>MarketScan 2003-2015</b> |             |                  |             |                |
|-------------------------------------------|----------------------|-------------|------------------|-------------|----------------|-----------------------------|-------------|------------------|-------------|----------------|
|                                           | <b>Exposed</b>       |             | <b>Unexposed</b> |             | <b>Stdifff</b> | <b>Exposed</b>              |             | <b>Unexposed</b> |             | <b>Stdifff</b> |
|                                           | <b>N/Mean</b>        | <b>%/SD</b> | <b>N/Mean</b>    | <b>%/SD</b> |                | <b>N/Mean</b>               | <b>%/SD</b> | <b>N/Mean</b>    | <b>%/SD</b> |                |
| Tobacco use                               | 8,812                | 12.58       | 191,161          | 12.48       | 0.00           | 606                         | 4.88        | 50,555           | 4.39        | 0.02           |
| Concomitant medications, N (%)            |                      |             |                  |             |                |                             |             |                  |             |                |
| Antidepressants                           | 21,002               | 29.97       | 482,632          | 31.50       | -0.03          | 3,697                       | 29.74       | 342,963          | 29.76       | 0.00           |
| Antiemetics                               | 27,289               | 38.94       | 593,935          | 38.77       | 0.00           | 5,481                       | 44.09       | 513,389          | 44.55       | -0.01          |
| Antihypertensives                         | 6,108                | 8.72        | 137,786          | 8.99        | -0.01          | 1,305                       | 10.50       | 117,523          | 10.20       | 0.01           |
| Benzodiazepines                           | 14,340               | 20.46       | 307,909          | 20.10       | 0.01           | 2,952                       | 23.75       | 264,276          | 22.93       | 0.02           |
| Anti-diabetics                            | 1,390                | 1.98        | 32,018           | 2.09        | -0.01          | 556                         | 4.47        | 52,196           | 4.53        | 0.00           |
| Insulin                                   | 1,280                | 1.83        | 29,833           | 1.95        | -0.01          | 265                         | 2.13        | 25,598           | 2.22        | -0.01          |
| Psychostimulants                          | 1,819                | 2.60        | 42,073           | 2.75        | -0.01          | 522                         | 4.20        | 44,927           | 3.90        | 0.02           |
| Suspected teratogens                      | 16,309               | 23.27       | 357,238          | 23.32       | 0.00           | 2,094                       | 16.85       | 195,552          | 16.97       | 0.00           |
| Antibiotics                               | 53,099               | 75.78       | 1,173,517        | 76.59       | -0.02          | 8,386                       | 67.47       | 803,993          | 69.76       | -0.05          |
| Anticonvulsants                           | 7,435                | 10.61       | 172,260          | 11.24       | -0.02          | 1,298                       | 10.44       | 113,085          | 9.81        | 0.02           |
| Anxiolytics                               | 1,410                | 2.01        | 36,562           | 2.39        | -0.03          | 157                         | 1.26        | 15,256           | 1.32        | -0.01          |
| Atypical antipsychotics                   | 214                  | 0.31        | 5,214            | 0.34        | -0.01          | 16                          | 0.13        | 2,315            | 0.20        | -0.02          |
| Barbiturates                              | 3,831                | 5.47        | 81,998           | 5.35        | 0.01           | 1,170                       | 9.41        | 106,263          | 9.22        | 0.01           |
| Clomiphene                                | 13                   | 0.02        | 241              | 0.02        | 0.00           | 383                         | 3.08        | 37,266           | 3.23        | -0.01          |
| Corticosteroids                           | 17,633               | 25.16       | 396,749          | 25.90       | -0.02          | 3,749                       | 30.16       | 359,271          | 31.17       | -0.02          |
| Folate Supplementation                    | 37,473               | 53.48       | 828,743          | 54.09       | -0.01          | 4,876                       | 39.23       | 456,494          | 39.61       | -0.01          |
| Gonadotropin                              | <11***               | 0.00        | <11***           | 0.00        | 0.01           | 567                         | 4.56        | 56,742           | 4.92        | -0.02          |
| Mood stabilizers                          | 3,618                | 5.16        | 79,957           | 5.22        | 0.00           | 680                         | 5.47        | 60,262           | 5.23        | 0.01           |
| Other hypnotics                           | 8,608                | 12.28       | 187,804          | 12.26       | 0.00           | 1,663                       | 13.38       | 143,308          | 12.43       | 0.03           |
| Progestins                                | 5,096                | 7.27        | 110,642          | 7.22        | 0.00           | 2,255                       | 18.14       | 215,294          | 18.68       | -0.01          |
| Triptans                                  | 3,541                | 5.05        | 87,064           | 5.68        | -0.03          | 1,171                       | 9.42        | 114,559          | 9.94        | -0.02          |
| Typical antipsychotics                    | 3,215                | 4.59        | 72,488           | 4.73        | -0.01          | 208                         | 1.67        | 18,960           | 1.65        | 0.00           |
| General markers of comorbidity, mean (SD) |                      |             |                  |             |                |                             |             |                  |             |                |
| Obstetric comorbidity index               | 0.52                 | 0.96        | 0.53             | 0.97        | -0.01          | 0.72                        | 0.74        | 1.04             | 1.04        | -0.02          |
| N distinct non-opioid prescription drugs  | 3.79                 | 3.46        | 3.64             | 3.24        | 0.04           | 3.69                        | 3.59        | 3.42             | 3.14        | 0.03           |

|                           | <i>MAX 2000-2014</i> |             |                  |             |                | <i>MarketScan 2003-2015</i> |             |                  |             |                |
|---------------------------|----------------------|-------------|------------------|-------------|----------------|-----------------------------|-------------|------------------|-------------|----------------|
|                           | <b>Exposed</b>       |             | <b>Unexposed</b> |             | <b>Stdifff</b> | <b>Exposed</b>              |             | <b>Unexposed</b> |             | <b>Stdifff</b> |
|                           | <b>N/Mean</b>        | <b>%/SD</b> | <b>N/Mean</b>    | <b>%/SD</b> |                | <b>N/Mean</b>               | <b>%/SD</b> | <b>N/Mean</b>    | <b>%/SD</b> |                |
| N distinct diagnoses      | 5.48                 | 4.70        | 5.71             | 4.92        | -0.05          | 4.25                        | 4.60        | 4.02             | 4.44        | -0.08          |
| N emergency room visits   | 0.93                 | 1.66        | 0.85             | 1.53        | 0.05           | 0.23                        | 0.20        | 0.76             | 0.58        | 0.06           |
| N hospitalizations        | 0.07                 | 0.32        | 0.07             | 0.29        | 0.01           | 0.03                        | 0.03        | 0.19             | 0.18        | 0.01           |
| N outpatient visits       | 4.21                 | 4.79        | 4.47             | 5.83        | -0.05          | 4.03                        | 4.53        | 4.42             | 5.21        | -0.10          |
| Multiple gestation, N (%) | 1,135                | 1.62        | 22,917           | 1.50        | 0.01           | 435                         | 3.50        | 42,343           | 3.67        | -0.01          |
| Multiparity, N (%)        | 57,007               | 81.35       | 1,233,226        | 80.49       | 0.02           | *                           | *           | *                | *           | *              |

\* Information not available for MarketScan.

\*\* 2011-2014 for MAX.

\*\*\* Cell size <11 for MAX cohort. Numbers suppressed in accord with the CMS cell size suppression policy.

Abbreviations: N, number; SD, standard deviation; Stdifff, standardized difference.

eTable 5 Absolute Risk of Congenital Malformations (Primary Outcomes) Among Infants Born to Mothers With and Without Exposure to Opioids.

|                                                           | MAX 2000-2014                  |                           |                                    | MarketScan 2003-2015           |                           |                                    |
|-----------------------------------------------------------|--------------------------------|---------------------------|------------------------------------|--------------------------------|---------------------------|------------------------------------|
|                                                           | Events                         | Total                     | Risk                               | Events                         | Total                     | Risk                               |
|                                                           | <i>no. of affected infants</i> | <i>no. of pregnancies</i> | <i>no./1,000 infants (95 % CI)</i> | <i>no. of affected infants</i> | <i>no. of pregnancies</i> | <i>no./1,000 infants (95 % CI)</i> |
| <b>Any Congenital Malformation</b>                        |                                |                           |                                    |                                |                           |                                    |
| Exposed                                                   | 2,887                          | 70,447                    | 40.98 (39.52 - 42.45)              | 530                            | 12,454                    | 42.56 (39.01 - 46.10)              |
| Unexposed                                                 | 48,996                         | 1,532,133                 | 31.98 (31.70 - 32.26)              | 43,470                         | 1,165,222                 | 37.31 (36.96 - 37.65)              |
| <b>Any Cardiovascular Malformation</b>                    |                                |                           |                                    |                                |                           |                                    |
| Exposed                                                   | 768                            | 70,447                    | 10.90 (10.13 - 11.67)              | 144                            | 12,454                    | 11.56 (9.68 - 13.44)               |
| Unexposed                                                 | 12,800                         | 1,532,133                 | 8.35 (8.21 - 8.50)                 | 10,521                         | 1,165,222                 | 9.03 (8.86 - 9.20)                 |
| <b>Ventricular Septal Defect</b>                          |                                |                           |                                    |                                |                           |                                    |
| Exposed                                                   | 343                            | 70,447                    | 4.87 (4.35 - 5.38)                 | 79                             | 12,454                    | 6.34 (4.95 - 7.74)                 |
| Unexposed                                                 | 5,973                          | 1,532,133                 | 3.90 (3.80 - 4.00)                 | 5,778                          | 1,165,222                 | 4.96 (4.83 - 5.09)                 |
| <b>Secundum Atrial Septal Defect/Patent Foramen Ovale</b> |                                |                           |                                    |                                |                           |                                    |
| Exposed                                                   | 181                            | 70,447                    | 2.57 (2.20 - 2.94)                 | 34                             | 12,454                    | 2.73 (1.81 - 3.65)                 |
| Unexposed                                                 | 2,736                          | 1,532,133                 | 1.79 (1.72 - 1.85)                 | 2,854                          | 1,165,222                 | 2.45 (2.36 - 2.54)                 |
| <b>Neural Tube Defect</b>                                 |                                |                           |                                    |                                |                           |                                    |
| Exposed                                                   | 28                             | 70,447                    | 0.40 (0.25 - 0.54)                 | 6                              | 12,454                    | 0.48 (0.10 - 0.87)                 |
| Unexposed                                                 | 553                            | 1,532,133                 | 0.36 (0.33 - 0.39)                 | 424                            | 1,165,222                 | 0.36 (0.33 - 0.40)                 |
| <b>Club Foot</b>                                          |                                |                           |                                    |                                |                           |                                    |
| Exposed                                                   | 155                            | 70,447                    | 2.20 (1.85 - 2.55)                 | 20                             | 12,454                    | 1.61 (0.90 - 2.31)                 |
| Unexposed                                                 | 2,356                          | 1,532,133                 | 1.54 (1.48 - 1.60)                 | 1,781                          | 1,165,222                 | 1.53 (1.46 - 1.60)                 |
| <b>Oral Cleft</b>                                         |                                |                           |                                    |                                |                           |                                    |
| Exposed                                                   | 109                            | 70,447                    | 1.55 (1.26 - 1.84)                 | 28                             | 12,454                    | 2.25 (1.42 - 3.08)                 |
| Unexposed                                                 | 1,702                          | 1,532,133                 | 1.11 (1.06 - 1.16)                 | 1,441                          | 1,165,222                 | 1.24 (1.17 - 1.30)                 |

Abbreviations: CI, confidence interval; no., number.

eTable 6 Risk of Congenital Malformations (Primary Outcomes) in Infants Following Exposure to Opioids During the First Trimester: Sensitivity Analyses.

|                                                              | Unadjusted                           |                                      |                        | Propensity Score Weighted            |                                      |                        |
|--------------------------------------------------------------|--------------------------------------|--------------------------------------|------------------------|--------------------------------------|--------------------------------------|------------------------|
|                                                              | Exposed to Opioids                   | Unexposed                            | Relative Risk (95% CI) | Exposed to Opioids                   | Unexposed                            | Relative Risk (95% CI) |
|                                                              | No. of Events / Total No. Of Infants | No. of Events / Total No. Of Infants |                        | No. of Events / Total No. Of Infants | No. of Events / Total No. Of Infants |                        |
| <b>A) ANY CONGENITAL MALFORMATION</b>                        |                                      |                                      |                        |                                      |                                      |                        |
| <b>Hd-PS estimate</b>                                        |                                      |                                      |                        |                                      |                                      |                        |
| MAX                                                          | N/A                                  | N/A                                  | N/A                    | 2869 / 70112                         | 48996 / 1532133                      | 1.10 (1.05 - 1.15)     |
| MarketScan                                                   | N/A                                  | N/A                                  | N/A                    | 529 / 12427                          | 43470 / 1165221                      | 1.01 (0.93 - 1.11)     |
| Pooled                                                       | N/A                                  | N/A                                  | N/A                    | 3398 / 82539                         | 92466 / 2697354                      | 1.08 (1.04 - 1.13)     |
| <b>Discontinuers as referent</b>                             |                                      |                                      |                        |                                      |                                      |                        |
| MAX                                                          | 2037 / 48279                         | 8169 / 223569                        | 1.15 (1.10 - 1.21)     | 2033 / 48226                         | 8168 / 223454                        | 1.00 (0.95 - 1.06)     |
| MarketScan                                                   | 311 / 7451                           | 3807 / 92713                         | 1.02 (0.91 - 1.14)     | 311 / 7449                           | 3793 / 92436                         | 0.93 (0.82 - 1.05)     |
| Pooled                                                       | 2348 / 55730                         | 11976 / 316282                       | 1.13 (1.08 - 1.18)     | 2344 / 55675                         | 11961 / 315890                       | 0.99 (0.94 - 1.04)     |
| <b>Excluding women with aberrant opioid filling patterns</b> |                                      |                                      |                        |                                      |                                      |                        |
| MAX                                                          | 2213 / 54800                         | 48996 / 1532133                      | 1.26 (1.21 - 1.32)     | 2209 / 54735                         | 48996 / 1532114                      | 1.07 (1.02 - 1.12)     |
| MarketScan                                                   | 509 / 12016                          | 43470 / 1165222                      | 1.14 (1.04 - 1.24)     | 508 / 12006                          | 42929 / 1153073                      | 1.01 (0.92 - 1.10)     |
| Pooled                                                       | 2722 / 66816                         | 92466 / 2697355                      | 1.24 (1.19 - 1.28)     | 2717 / 66741                         | 91925 / 2685187                      | 1.06 (1.01 - 1.10)     |
| <b>Restriction to women with folate supplementation</b>      |                                      |                                      |                        |                                      |                                      |                        |
| MAX                                                          | 1570 / 37659                         | 22750 / 679575                       | 1.25 (1.18 - 1.31)     | 1570 / 37659                         | 22717 / 678358                       | 1.05 (0.99 - 1.12)     |
| MarketScan                                                   | 196 / 4885                           | 15045 / 402624                       | 1.07 (0.94 - 1.23)     | 196 / 4874                           | 14801 / 396869                       | 0.97 (0.84 - 1.12)     |
| Pooled                                                       | 1766 / 42544                         | 37795 / 1082199                      | 1.22 (1.17 - 1.28)     | 1766 / 42533                         | 37518 / 1075227                      | 1.04 (0.98 - 1.10)     |
| <b>Late first trimester exposure</b>                         |                                      |                                      |                        |                                      |                                      |                        |
| MAX                                                          | 1999 / 48148                         | 48996 / 1532133                      | 1.30 (1.24 - 1.36)     | 1991 / 47982                         | 48996 / 1532133                      | 1.09 (1.03 - 1.15)     |
| MarketScan                                                   | 349 / 8052                           | 43470 / 1165222                      | 1.16 (1.05 - 1.29)     | 348 / 8033                           | 42604 / 1145452                      | 1.03 (0.93 - 1.16)     |
| Pooled                                                       | 2348 / 56200                         | 92466 / 2697355                      | 1.28 (1.23 - 1.33)     | 2339 / 56015                         | 91600 / 2677585                      | 1.08 (1.03 - 1.13)     |
| <b>Outcome assessment to 365 days</b>                        |                                      |                                      |                        |                                      |                                      |                        |
| MAX                                                          | 3696 / 56921                         | 63361 / 1238327                      | 1.27 (1.23 - 1.31)     | 3696 / 56895                         | 63353 / 1237985                      | 0.97 (0.94 - 1.00)     |
| MarketScan                                                   | 776 / 8983                           | 64228 / 851107                       | 1.14 (1.07 - 1.22)     | 776 / 8983                           | 63877 / 847613                       | 0.97 (0.91 - 1.04)     |
| Pooled                                                       | 4472 / 65904                         | 127589 / 2089434                     | 1.25 (1.21 - 1.28)     | 4472 / 65878                         | 127230 / 2085598                     | 0.97 (0.94 - 1.00)     |

| <b>Negative control analysis</b>                 |              |                 |                    |              |                 |                    |
|--------------------------------------------------|--------------|-----------------|--------------------|--------------|-----------------|--------------------|
| MAX                                              | 935 / 26147  | 43030 / 1354414 | 1.13 (1.06 - 1.20) | 935 / 26147  | 42960 / 1352772 | 1.04 (0.98 - 1.11) |
| MarketScan                                       | 259 / 7695   | 40319 / 1082135 | 0.90 (0.80 - 1.02) | 259 / 7695   | 40287 / 1081268 | 0.92 (0.81 - 1.03) |
| Pooled                                           | 1194 / 33842 | 83349 / 2436549 | 1.07 (1.01 - 1.13) | 1194 / 33842 | 83247 / 2434040 | 1.01 (0.96 - 1.07) |
| <b>Hydrocodone</b>                               |              |                 |                    |              |                 |                    |
| MAX                                              | 1449 / 35259 | 48996 / 1532133 | 1.29 (1.22 - 1.35) | 1444 / 35066 | 48817 / 1525321 | 1.06 (0.99 - 1.13) |
| MarketScan                                       | 234 / 5775   | 43470 / 1165222 | 1.09 (0.96 - 1.23) | 234 / 5774   | 42763 / 1148210 | 0.93 (0.82 - 1.06) |
| Pooled                                           | 1683 / 41034 | 92466 / 2697355 | 1.25 (1.20 - 1.32) | 1678 / 40840 | 91580 / 2673531 | 1.03 (0.98 - 1.09) |
| <b>Oxycodone</b>                                 |              |                 |                    |              |                 |                    |
| MAX                                              | 288 / 7019   | 48996 / 1532133 | 1.28 (1.15 - 1.44) | 281 / 6945   | 44313 / 1357932 | 1.00 (0.87 - 1.14) |
| MarketScan                                       | 80 / 1467    | 43470 / 1165222 | 1.46 (1.18 - 1.81) | 80 / 1440    | 33409 / 872696  | 1.20 (0.96 - 1.50) |
| Pooled                                           | 368 / 8486   | 92466 / 2697355 | 1.32 (1.19 - 1.46) | 361 / 8385   | 77722 / 2230628 | 1.05 (0.94 - 1.18) |
| <b>Codeine</b>                                   |              |                 |                    |              |                 |                    |
| MAX                                              | 352 / 9501   | 48996 / 1532133 | 1.16 (1.05 - 1.28) | 346 / 9431   | 48541 / 1520158 | 1.05 (0.94 - 1.17) |
| MarketScan                                       | 57 / 1549    | 43470 / 1165222 | 0.99 (0.76 - 1.27) | 57 / 1529    | 43035 / 1155583 | 0.87 (0.67 - 1.13) |
| Pooled                                           | 409 / 11050  | 92466 / 2697355 | 1.13 (1.03 - 1.25) | 403 / 10960  | 91576 / 2675741 | 1.02 (0.92 - 1.13) |
| <b>Dose Analysis: &lt;= 300 MME</b>              |              |                 |                    |              |                 |                    |
| MAX                                              | 1078 / 27495 | 48996 / 1532133 | 1.23 (1.16 - 1.30) | 1075 / 27436 | 48729 / 1524384 | 1.07 (1.00 - 1.14) |
| MarketScan                                       | 130 / 3297   | 43470 / 1165222 | 1.06 (0.89 - 1.25) | 130 / 3296   | 42862 / 1152097 | 0.95 (0.80 - 1.13) |
| Pooled                                           | 1208 / 30792 | 92466 / 2697355 | 1.21 (1.14 - 1.28) | 1205 / 30732 | 91591 / 2676481 | 1.05 (0.99 - 1.12) |
| <b>Dose Analysis: &gt;300 MME - &lt;=600 MME</b> |              |                 |                    |              |                 |                    |
| MAX                                              | 620 / 14568  | 48996 / 1532133 | 1.33 (1.23 - 1.44) | 616 / 14483  | 48751 / 1523762 | 1.09 (1.00 - 1.19) |
| MarketScan                                       | 91 / 2133    | 43470 / 1165222 | 1.14 (0.94 - 1.40) | 91 / 2129    | 42214 / 1136288 | 1.02 (0.83 - 1.26) |
| Pooled                                           | 711 / 16701  | 92466 / 2697355 | 1.31 (1.21 - 1.40) | 707 / 16612  | 90965 / 2660050 | 1.08 (0.99 - 1.17) |
| <b>Dose Analysis: &gt;600 - &lt;=1200 MME</b>    |              |                 |                    |              |                 |                    |
| MAX                                              | 475 / 11337  | 48996 / 1532133 | 1.31 (1.20 - 1.43) | 473 / 11311  | 48995 / 1532132 | 1.04 (0.95 - 1.15) |
| MarketScan                                       | 79 / 1825    | 43470 / 1165222 | 1.16 (0.94 - 1.44) | 79 / 1818    | 43463 / 1165114 | 1.03 (0.82 - 1.29) |
| Pooled                                           | 554 / 13162  | 92466 / 2697355 | 1.29 (1.18 - 1.40) | 552 / 13129  | 92458 / 2697246 | 1.04 (0.95 - 1.14) |
| <b>Dose Analysis: &gt;1200 MME</b>               |              |                 |                    |              |                 |                    |
| MAX                                              | 667 / 15808  | 48996 / 1532133 | 1.32 (1.22 - 1.42) | 664 / 15759  | 48918 / 1528506 | 1.04 (0.94 - 1.14) |
| MarketScan                                       | 208 / 4685   | 43470 / 1165222 | 1.19 (1.04 - 1.36) | 208 / 4657   | 42822 / 1150112 | 1.02 (0.88 - 1.18) |



|        |             |                 |                    |             |                 |                    |
|--------|-------------|-----------------|--------------------|-------------|-----------------|--------------------|
| Pooled | 875 / 20493 | 92466 / 2697355 | 1.29 (1.21 - 1.37) | 872 / 20416 | 91740 / 2678618 | 1.03 (0.95 - 1.11) |
|--------|-------------|-----------------|--------------------|-------------|-----------------|--------------------|

| <b>B) ANY CARDIOVASCULAR MALFORMATION</b>                    |              |                 |                    |              |                 |                    |
|--------------------------------------------------------------|--------------|-----------------|--------------------|--------------|-----------------|--------------------|
| <b>Hd-PS estimate</b>                                        |              |                 |                    |              |                 |                    |
| MAX                                                          | N/A          | N/A             | N/A                | 763 / 70112  | 12800 / 1532133 | 1.09 (0.99 - 1.19) |
| MarketScan                                                   | N/A          | N/A             | N/A                | 144 / 12427  | 10521 / 1165221 | 1.12 (0.94 - 1.35) |
| Pooled                                                       | N/A          | N/A             | N/A                | 907 / 82539  | 23321 / 2697354 | 1.09 (1.01 - 1.19) |
| <b>Discontinuers as referent</b>                             |              |                 |                    |              |                 |                    |
| MAX                                                          | 553 / 48279  | 2181 / 223569   | 1.17 (1.07 - 1.29) | 552 / 48226  | 2181 / 223454   | 0.99 (0.89 - 1.10) |
| MarketScan                                                   | 93 / 7451    | 976 / 92713     | 1.19 (0.96 - 1.46) | 93 / 7449    | 972 / 92436     | 1.07 (0.84 - 1.35) |
| Pooled                                                       | 646 / 55730  | 3157 / 316282   | 1.18 (1.08 - 1.28) | 645 / 55675  | 3153 / 315890   | 1.00 (0.91 - 1.10) |
| <b>Excluding women with aberrant opioid filling patterns</b> |              |                 |                    |              |                 |                    |
| MAX                                                          | 594 / 54800  | 12800 / 1532133 | 1.30 (1.20 - 1.41) | 593 / 54735  | 12800 / 1532114 | 1.09 (0.99 - 1.20) |
| MarketScan                                                   | 135 / 12016  | 10521 / 1165222 | 1.24 (1.05 - 1.47) | 135 / 12006  | 10407 / 1153073 | 1.10 (0.92 - 1.33) |
| Pooled                                                       | 729 / 66816  | 23321 / 2697355 | 1.29 (1.20 - 1.39) | 728 / 66741  | 23207 / 2685187 | 1.09 (1.00 - 1.19) |
| <b>Restriction to women with folate supplementation</b>      |              |                 |                    |              |                 |                    |
| MAX                                                          | 401 / 37659  | 5822 / 679575   | 1.24 (1.12 - 1.37) | 401 / 37659  | 5814 / 678358   | 1.04 (0.92 - 1.18) |
| MarketScan                                                   | 53 / 4885    | 3689 / 402624   | 1.18 (0.90 - 1.55) | 53 / 4874    | 3642 / 396869   | 1.10 (0.82 - 1.48) |
| Pooled                                                       | 454 / 42544  | 9511 / 1082199  | 1.24 (1.12 - 1.36) | 454 / 42533  | 9456 / 1075227  | 1.05 (0.94 - 1.18) |
| <b>Late first trimester exposure</b>                         |              |                 |                    |              |                 |                    |
| MAX                                                          | 537 / 48148  | 12800 / 1532133 | 1.34 (1.23 - 1.45) | 534 / 47982  | 12800 / 1532133 | 1.12 (1.01 - 1.24) |
| MarketScan                                                   | 99 / 8052    | 10521 / 1165222 | 1.36 (1.12 - 1.66) | 99 / 8033    | 10341 / 1145452 | 1.20 (0.97 - 1.49) |
| Pooled                                                       | 636 / 56200  | 23321 / 2697355 | 1.34 (1.24 - 1.45) | 633 / 56015  | 23141 / 2677585 | 1.13 (1.03 - 1.24) |
| <b>Outcome assessment to 365 days</b>                        |              |                 |                    |              |                 |                    |
| MAX                                                          | 907 / 56921  | 15259 / 1238327 | 1.29 (1.21 - 1.38) | 907 / 56895  | 15258 / 1237985 | 1.05 (0.98 - 1.12) |
| MarketScan                                                   | 160 / 8983   | 12232 / 851107  | 1.24 (1.06 - 1.45) | 160 / 8983   | 12169 / 847613  | 1.15 (0.99 - 1.35) |
| Pooled                                                       | 1067 / 65904 | 27491 / 2089434 | 1.28 (1.21 - 1.37) | 1067 / 65878 | 27427 / 2085598 | 1.06 (1.00 - 1.13) |
| <b>Negative control analysis</b>                             |              |                 |                    |              |                 |                    |
| MAX                                                          | 241 / 26147  | 11266 / 1354414 | 1.11 (0.98 - 1.26) | 241 / 26147  | 11245 / 1352772 | 1.05 (0.92 - 1.19) |
| MarketScan                                                   | 57 / 7695    | 9749 / 1082135  | 0.82 (0.63 - 1.07) | 57 / 7695    | 9740 / 1081268  | 0.82 (0.63 - 1.06) |
| Pooled                                                       | 298 / 33842  | 21015 / 2436549 | 1.05 (0.93 - 1.17) | 298 / 33842  | 20985 / 2434040 | 1.00 (0.89 - 1.12) |
| <b>Hydrocodone</b>                                           |              |                 |                    |              |                 |                    |

|                                                  |             |                 |                    |             |                 |                    |
|--------------------------------------------------|-------------|-----------------|--------------------|-------------|-----------------|--------------------|
| MAX                                              | 374 / 35259 | 12800 / 1532133 | 1.27 (1.15 - 1.41) | 372 / 35066 | 12751 / 1525321 | 1.01 (0.89 - 1.14) |
| MarketScan                                       | 65 / 5775   | 10521 / 1165222 | 1.25 (0.98 - 1.59) | 65 / 5774   | 10371 / 1148210 | 1.08 (0.83 - 1.39) |
| Pooled                                           | 439 / 41034 | 23321 / 2697355 | 1.27 (1.15 - 1.39) | 437 / 40840 | 23122 / 2673531 | 1.02 (0.91 - 1.14) |
| <b>Oxycodone</b>                                 |             |                 |                    |             |                 |                    |
| MAX                                              | 75 / 7019   | 12800 / 1532133 | 1.28 (1.02 - 1.60) | 73 / 6945   | 11576 / 1357932 | 0.99 (0.76 - 1.28) |
| MarketScan                                       | 20 / 1467   | 10521 / 1165222 | 1.51 (0.98 - 2.33) | 20 / 1440   | 7964 / 872696   | 1.30 (0.82 - 2.06) |
| Pooled                                           | 95 / 8486   | 23321 / 2697355 | 1.32 (1.08 - 1.62) | 93 / 8385   | 19540 / 2230628 | 1.05 (0.84 - 1.32) |
| <b>Codeine</b>                                   |             |                 |                    |             |                 |                    |
| MAX                                              | 110 / 9501  | 12800 / 1532133 | 1.39 (1.15 - 1.67) | 108 / 9431  | 12679 / 1520158 | 1.23 (1.01 - 1.50) |
| MarketScan                                       | 12 / 1549   | 10521 / 1165222 | 0.86 (0.49 - 1.51) | 12 / 1529   | 10406 / 1155583 | 0.72 (0.40 - 1.28) |
| Pooled                                           | 122 / 11050 | 23321 / 2697355 | 1.32 (1.11 - 1.58) | 120 / 10960 | 23085 / 2675741 | 1.16 (0.97 - 1.40) |
| <b>Dose Analysis: &lt;= 300 MME</b>              |             |                 |                    |             |                 |                    |
| MAX                                              | 263 / 27495 | 12800 / 1532133 | 1.15 (1.01 - 1.29) | 262 / 27436 | 12734 / 1524384 | 1.00 (0.87 - 1.14) |
| MarketScan                                       | 32 / 3297   | 10521 / 1165222 | 1.07 (0.76 - 1.52) | 32 / 3296   | 10387 / 1152097 | 0.97 (0.69 - 1.37) |
| Pooled                                           | 295 / 30792 | 23321 / 2697355 | 1.14 (1.01 - 1.28) | 294 / 30732 | 23121 / 2676481 | 0.99 (0.88 - 1.13) |
| <b>Dose Analysis: &gt;300 MME - &lt;=600 MME</b> |             |                 |                    |             |                 |                    |
| MAX                                              | 179 / 14568 | 12800 / 1532133 | 1.47 (1.27 - 1.70) | 178 / 14483 | 12738 / 1523762 | 1.22 (1.04 - 1.44) |
| MarketScan                                       | 23 / 2133   | 10521 / 1165222 | 1.19 (0.80 - 1.79) | 23 / 2129   | 10258 / 1136288 | 1.06 (0.70 - 1.60) |
| Pooled                                           | 202 / 16701 | 23321 / 2697355 | 1.44 (1.25 - 1.65) | 201 / 16612 | 22996 / 2660050 | 1.20 (1.03 - 1.40) |
| <b>Dose Analysis: &gt;600 - &lt;=1200 MME</b>    |             |                 |                    |             |                 |                    |
| MAX                                              | 129 / 11337 | 12800 / 1532133 | 1.36 (1.15 - 1.62) | 128 / 11311 | 12800 / 1532132 | 1.04 (0.86 - 1.25) |
| MarketScan                                       | 24 / 1825   | 10521 / 1165222 | 1.46 (0.98 - 2.17) | 24 / 1818   | 10520 / 1165114 | 1.25 (0.82 - 1.92) |
| Pooled                                           | 153 / 13162 | 23321 / 2697355 | 1.38 (1.18 - 1.61) | 152 / 13129 | 23320 / 2697246 | 1.07 (0.90 - 1.27) |
| <b>Dose Analysis: &gt;1200 MME</b>               |             |                 |                    |             |                 |                    |
| MAX                                              | 179 / 15808 | 12800 / 1532133 | 1.36 (1.17 - 1.57) | 177 / 15759 | 12782 / 1528506 | 0.99 (0.82 - 1.18) |
| MarketScan                                       | 59 / 4685   | 10521 / 1165222 | 1.39 (1.08 - 1.80) | 59 / 4657   | 10374 / 1150112 | 1.21 (0.91 - 1.62) |
| Pooled                                           | 238 / 20493 | 23321 / 2697355 | 1.37 (1.20 - 1.55) | 236 / 20416 | 23156 / 2678618 | 1.04 (0.90 - 1.22) |

| <b>C) VENTRICULAR SEPTAL DEFECT</b> |     |     |     |             |                |                    |
|-------------------------------------|-----|-----|-----|-------------|----------------|--------------------|
| <b>Hd-PS estimate</b>               |     |     |     |             |                |                    |
| MAX                                 | N/A | N/A | N/A | 340 / 70112 | 5973 / 1532133 | 1.10 (0.96 - 1.26) |
| MarketScan                          | N/A | N/A | N/A | 79 / 12427  | 5778 / 1165221 | 1.12 (0.87 - 1.44) |

|                                                              |             |                 |                    |             |                 |                    |
|--------------------------------------------------------------|-------------|-----------------|--------------------|-------------|-----------------|--------------------|
| Pooled                                                       | N/A         | N/A             | N/A                | 419 / 82539 | 11751 / 2697354 | 1.10 (0.98 - 1.24) |
| <b>Discontinuers as referent</b>                             |             |                 |                    |             |                 |                    |
| MAX                                                          | 242 / 48279 | 1023 / 223569   | 1.10 (0.95 - 1.26) | 241 / 48226 | 1023 / 223454   | 0.93 (0.78 - 1.09) |
| MarketScan                                                   | 51 / 7451   | 489 / 92713     | 1.30 (0.97 - 1.73) | 51 / 7449   | 488 / 92436     | 1.21 (0.86 - 1.68) |
| Pooled                                                       | 293 / 55730 | 1512 / 316282   | 1.13 (1.00 - 1.28) | 292 / 55675 | 1511 / 315890   | 0.97 (0.84 - 1.13) |
| <b>Excluding women with aberrant opioid filling patterns</b> |             |                 |                    |             |                 |                    |
| MAX                                                          | 267 / 54800 | 5973 / 1532133  | 1.25 (1.11 - 1.41) | 267 / 54735 | 5973 / 1532114  | 1.08 (0.94 - 1.25) |
| MarketScan                                                   | 74 / 12016  | 5778 / 1165222  | 1.24 (0.99 - 1.56) | 74 / 12006  | 5716 / 1153073  | 1.10 (0.85 - 1.42) |
| Pooled                                                       | 341 / 66816 | 11751 / 2697355 | 1.25 (1.12 - 1.39) | 341 / 66741 | 11689 / 2685187 | 1.09 (0.96 - 1.23) |
| <b>Restriction to women with folate supplementation</b>      |             |                 |                    |             |                 |                    |
| MAX                                                          | 180 / 37659 | 2741 / 679575   | 1.19 (1.02 - 1.38) | 180 / 37659 | 2736 / 678358   | 1.04 (0.86 - 1.26) |
| MarketScan                                                   | 34 / 4885   | 2062 / 402624   | 1.36 (0.97 - 1.91) | 34 / 4874   | 2041 / 396869   | 1.12 (0.77 - 1.62) |
| Pooled                                                       | 214 / 42544 | 4803 / 1082199  | 1.21 (1.06 - 1.39) | 214 / 42533 | 4777 / 1075227  | 1.05 (0.89 - 1.25) |
| <b>Late first trimester exposure</b>                         |             |                 |                    |             |                 |                    |
| MAX                                                          | 242 / 48148 | 5973 / 1532133  | 1.29 (1.13 - 1.47) | 240 / 47982 | 5973 / 1532133  | 1.12 (0.96 - 1.31) |
| MarketScan                                                   | 52 / 8052   | 5778 / 1165222  | 1.30 (0.99 - 1.71) | 52 / 8033   | 5676 / 1145452  | 1.14 (0.84 - 1.55) |
| Pooled                                                       | 294 / 56200 | 11751 / 2697355 | 1.29 (1.15 - 1.45) | 292 / 56015 | 11649 / 2677585 | 1.13 (0.98 - 1.29) |
| <b>Outcome assessment to 365 days</b>                        |             |                 |                    |             |                 |                    |
| MAX                                                          | 342 / 56921 | 6221 / 1238327  | 1.20 (1.07 - 1.33) | 342 / 56895 | 6221 / 1237985  | 1.08 (0.97 - 1.20) |
| MarketScan                                                   | 83 / 8983   | 5709 / 851107   | 1.38 (1.11 - 1.71) | 83 / 8983   | 5683 / 847613   | 1.29 (1.04 - 1.61) |
| Pooled                                                       | 425 / 65904 | 11930 / 2089434 | 1.23 (1.12 - 1.36) | 425 / 65878 | 11904 / 2085598 | 1.12 (1.01 - 1.23) |
| <b>Negative control analysis</b>                             |             |                 |                    |             |                 |                    |
| MAX                                                          | 107 / 26147 | 5278 / 1354414  | 1.05 (0.87 - 1.27) | 107 / 26147 | 5269 / 1352772  | 1.00 (0.83 - 1.22) |
| MarketScan                                                   | 24 / 7695   | 5379 / 1082135  | 0.63 (0.42 - 0.94) | 24 / 7695   | 5373 / 1081268  | 0.62 (0.42 - 0.93) |
| Pooled                                                       | 131 / 33842 | 10657 / 2436549 | 0.95 (0.80 - 1.13) | 131 / 33842 | 10642 / 2434040 | 0.92 (0.77 - 1.09) |
| <b>Hydrocodone</b>                                           |             |                 |                    |             |                 |                    |
| MAX                                                          | 161 / 35259 | 5973 / 1532133  | 1.17 (1.00 - 1.37) | 159 / 35066 | 5954 / 1525321  | 0.99 (0.81 - 1.20) |
| MarketScan                                                   | 33 / 5775   | 5778 / 1165222  | 1.15 (0.82 - 1.62) | 33 / 5774   | 5694 / 1148210  | 1.01 (0.70 - 1.45) |
| Pooled                                                       | 194 / 41034 | 11751 / 2697355 | 1.17 (1.01 - 1.35) | 192 / 40840 | 11648 / 2673531 | 0.99 (0.83 - 1.18) |
| <b>Oxycodone</b>                                             |             |                 |                    |             |                 |                    |
| MAX                                                          | 34 / 7019   | 5973 / 1532133  | 1.24 (0.89 - 1.74) | 32 / 6945   | 5385 / 1357932  | 0.93 (0.61 - 1.40) |

|                                                  |             |                 |                    |             |                 |                    |
|--------------------------------------------------|-------------|-----------------|--------------------|-------------|-----------------|--------------------|
| MarketScan                                       | 13 / 1467   | 5778 / 1165222  | 1.79 (1.04 - 3.07) | 13 / 1440   | 4328 / 872696   | 1.69 (0.91 - 3.15) |
| Pooled                                           | 47 / 8486   | 11751 / 2697355 | 1.37 (1.03 - 1.83) | 45 / 8385   | 9713 / 2230628  | 1.11 (0.79, 1.57)  |
| <b>Codeine</b>                                   |             |                 |                    |             |                 |                    |
| MAX                                              | 49 / 9501   | 5973 / 1532133  | 1.32 (1.00 - 1.75) | 47 / 9431   | 5914 / 1520158  | 1.20 (0.88 - 1.62) |
| MarketScan                                       | 6 / 1549    | 5778 / 1165222  | 0.78 (0.35 - 1.74) | 6 / 1529    | 5708 / 1155583  | 0.68 (0.30 - 1.55) |
| Pooled                                           | 55 / 11050  | 11751 / 2697355 | 1.25 (0.96 - 1.63) | 53 / 10960  | 11622 / 2675741 | 1.12 (0.84 - 1.49) |
| <b>Dose Analysis: &lt;= 300 MME</b>              |             |                 |                    |             |                 |                    |
| MAX                                              | 122 / 27495 | 5973 / 1532133  | 1.14 (0.95 - 1.36) | 121 / 27436 | 5940 / 1524384  | 1.06 (0.87 - 1.29) |
| MarketScan                                       | 14 / 3297   | 5778 / 1165222  | 0.86 (0.51 - 1.45) | 14 / 3296   | 5699 / 1152097  | 0.78 (0.46 - 1.32) |
| Pooled                                           | 136 / 30792 | 11751 / 2697355 | 1.10 (0.93 - 1.31) | 135 / 30732 | 11639 / 2676481 | 1.02 (0.85 - 1.23) |
| <b>Dose Analysis: &gt;300 MME - &lt;=600 MME</b> |             |                 |                    |             |                 |                    |
| MAX                                              | 67 / 14568  | 5973 / 1532133  | 1.18 (0.93 - 1.50) | 66 / 14483  | 5946 / 1523762  | 1.04 (0.80 - 1.36) |
| MarketScan                                       | 15 / 2133   | 5778 / 1165222  | 1.42 (0.86 - 2.35) | 15 / 2129   | 5629 / 1136288  | 1.26 (0.74 - 2.13) |
| Pooled                                           | 82 / 16701  | 11751 / 2697355 | 1.22 (0.98 - 1.52) | 81 / 16612  | 11575 / 2660050 | 1.08 (0.85 - 1.37) |
| <b>Dose Analysis: &gt;600 - &lt;=1200 MME</b>    |             |                 |                    |             |                 |                    |
| MAX                                              | 58 / 11337  | 5973 / 1532133  | 1.31 (1.01 - 1.70) | 57 / 11311  | 5973 / 1532132  | 1.05 (0.79 - 1.41) |
| MarketScan                                       | 16 / 1825   | 5778 / 1165222  | 1.77 (1.08 - 2.88) | 16 / 1818   | 5778 / 1165114  | 1.62 (0.95 - 2.76) |
| Pooled                                           | 74 / 13162  | 11751 / 2697355 | 1.40 (1.11 - 1.76) | 73 / 13129  | 11751 / 2697246 | 1.16 (0.90 - 1.50) |
| <b>Dose Analysis: &gt;1200 MME</b>               |             |                 |                    |             |                 |                    |
| MAX                                              | 85 / 15808  | 5973 / 1532133  | 1.38 (1.11 - 1.71) | 83 / 15759  | 5964 / 1528506  | 1.01 (0.76 - 1.33) |
| MarketScan                                       | 30 / 4685   | 5778 / 1165222  | 1.29 (0.90 - 1.85) | 30 / 4657   | 5698 / 1150112  | 1.05 (0.67 - 1.64) |
| Pooled                                           | 115 / 20493 | 11751 / 2697355 | 1.36 (1.13 - 1.63) | 113 / 20416 | 11662 / 2678618 | 1.02 (0.81 - 1.29) |

|                                                              |             |              |                    |             |                |                    |
|--------------------------------------------------------------|-------------|--------------|--------------------|-------------|----------------|--------------------|
| <b>D) SECUNDUM ATRIAL SEPTAL DEFECT/PATENT FORAMEN OVALE</b> |             |              |                    |             |                |                    |
| <b>Hd-PS estimate</b>                                        |             |              |                    |             |                |                    |
| MAX                                                          | N/A         | N/A          | N/A                | 180 / 70112 | 2736 / 1532133 | 1.08 (0.89 - 1.31) |
| MarketScan                                                   | N/A         | N/A          | N/A                | 34 / 12427  | 2854 / 1165221 | 1.07 (0.74 - 1.56) |
| Pooled                                                       | N/A         | N/A          | N/A                | 214 / 82539 | 5590 / 2697354 | 1.08 (0.91 - 1.28) |
| <b>Discontinuers as referent</b>                             |             |              |                    |             |                |                    |
| MAX                                                          | 134 / 48279 | 510 / 223569 | 1.22 (1.01 - 1.47) | 134 / 48226 | 510 / 223454   | 1.01 (0.80 - 1.26) |
| MarketScan                                                   | 22 / 7451   | 263 / 92713  | 1.04 (0.67 - 1.61) | 22 / 7449   | 262 / 92436    | 0.86 (0.53 - 1.39) |
| Pooled                                                       | 156 / 55730 | 773 / 316282 | 1.19 (1.00 - 1.41) | 156 / 55675 | 772 / 315890   | 0.98 (0.80 - 1.20) |

| <b>Excluding women with aberrant opioid filling patterns</b> |             |                 |                    |             |                 |                    |
|--------------------------------------------------------------|-------------|-----------------|--------------------|-------------|-----------------|--------------------|
| MAX                                                          | 133 / 54800 | 2736 / 1532133  | 1.36 (1.14 - 1.62) | 133 / 54735 | 2736 / 1532114  | 1.03 (0.84 - 1.25) |
| MarketScan                                                   | 30 / 12016  | 2854 / 1165222  | 1.02 (0.71 - 1.46) | 30 / 12006  | 2808 / 1153073  | 1.00 (0.67 - 1.47) |
| Pooled                                                       | 163 / 66816 | 5590 / 2697355  | 1.29 (1.10 - 1.50) | 163 / 66741 | 5544 / 2685187  | 1.02 (0.85 - 1.22) |
| <b>Restriction to women with folate supplementation</b>      |             |                 |                    |             |                 |                    |
| MAX                                                          | 102 / 37659 | 1299 / 679575   | 1.42 (1.16 - 1.73) | 102 / 37659 | 1297 / 678358   | 1.08 (0.84 - 1.39) |
| MarketScan                                                   | 7 / 4885    | 981 / 402624    | 0.59 (0.28 - 1.24) | 7 / 4874    | 962 / 396869    | 0.62 (0.28 - 1.39) |
| Pooled                                                       | 109 / 42544 | 2280 / 1082199  | 1.33 (1.10 - 1.62) | 109 / 42533 | 2259 / 1075227  | 1.03 (0.81 - 1.31) |
| <b>Late first trimester exposure</b>                         |             |                 |                    |             |                 |                    |
| MAX                                                          | 124 / 48148 | 2736 / 1532133  | 1.44 (1.21 - 1.73) | 124 / 47982 | 2736 / 1532133  | 1.08 (0.88 - 1.34) |
| MarketScan                                                   | 26 / 8052   | 2854 / 1165222  | 1.32 (0.90 - 1.94) | 26 / 8033   | 2791 / 1145452  | 1.29 (0.84 - 1.99) |
| Pooled                                                       | 150 / 56200 | 5590 / 2697355  | 1.42 (1.21 - 1.67) | 150 / 56015 | 5527 / 2677585  | 1.12 (0.93 - 1.35) |
| <b>Outcome assessment to 365 days</b>                        |             |                 |                    |             |                 |                    |
| MAX                                                          | 326 / 56921 | 5231 / 1238327  | 1.36 (1.21 - 1.52) | 326 / 56895 | 5231 / 1237985  | 1.00 (0.90 - 1.12) |
| MarketScan                                                   | 58 / 8983   | 4979 / 851107   | 1.10 (0.85 - 1.43) | 58 / 8983   | 4944 / 847613   | 1.08 (0.83 - 1.39) |
| Pooled                                                       | 384 / 65904 | 10210 / 2089434 | 1.31 (1.18 - 1.45) | 384 / 65878 | 10175 / 2085598 | 1.01 (0.92 - 1.12) |
| <b>Negative control analysis</b>                             |             |                 |                    |             |                 |                    |
| MAX                                                          | 56 / 26147  | 2380 / 1354414  | 1.22 (0.94 - 1.59) | 56 / 26147  | 2371 / 1352772  | 1.10 (0.84 - 1.44) |
| MarketScan                                                   | 15 / 7695   | 2622 / 1082135  | 0.80 (0.48 - 1.34) | 15 / 7695   | 2619 / 1081268  | 0.87 (0.52 - 1.44) |
| Pooled                                                       | 71 / 33842  | 5002 / 2436549  | 1.12 (0.88 - 1.41) | 71 / 33842  | 4990 / 2434040  | 1.04 (0.82 - 1.32) |
| <b>Hydrocodone</b>                                           |             |                 |                    |             |                 |                    |
| MAX                                                          | 90 / 35259  | 2736 / 1532133  | 1.43 (1.16 - 1.76) | 90 / 35066  | 2729 / 1525321  | 0.92 (0.71 - 1.20) |
| MarketScan                                                   | 16 / 5775   | 2854 / 1165222  | 1.13 (0.69 - 1.85) | 16 / 5774   | 2806 / 1148210  | 1.06 (0.63 - 1.78) |
| Pooled                                                       | 106 / 41034 | 5590 / 2697355  | 1.38 (1.14 - 1.67) | 106 / 40840 | 5535 / 2673531  | 0.95 (0.75 - 1.20) |
| <b>Oxycodone</b>                                             |             |                 |                    |             |                 |                    |
| MAX                                                          | 17 / 7019   | 2736 / 1532133  | 1.36 (0.84 - 2.18) | 17 / 6945   | 2483 / 1357932  | 1.03 (0.59 - 1.80) |
| MarketScan                                                   | 6 / 1467    | 2854 / 1165222  | 1.67 (0.75 - 3.71) | 6 / 1440    | 2134 / 872696   | 1.92 (0.85 - 4.30) |
| Pooled                                                       | 23 / 8486   | 5590 / 2697355  | 1.43 (0.95 - 2.16) | 23 / 8385   | 4617 / 2230628  | 1.26 (0.80 - 1.99) |
| <b>Codeine</b>                                               |             |                 |                    |             |                 |                    |
| MAX                                                          | 24 / 9501   | 2736 / 1532133  | 1.41 (0.95 - 2.11) | 24 / 9431   | 2695 / 1520158  | 1.23 (0.80 - 1.89) |
| MarketScan                                                   | 5 / 1549    | 2854 / 1165222  | 1.32 (0.55 - 3.16) | 5 / 1529    | 2826 / 1155583  | 1.30 (0.51 - 3.31) |

|                                                  |            |                |                    |            |                |                    |
|--------------------------------------------------|------------|----------------|--------------------|------------|----------------|--------------------|
| Pooled                                           | 29 / 11050 | 5590 / 2697355 | 1.40 (0.97 - 2.01) | 29 / 10960 | 5521 / 2675741 | 1.24 (0.84 - 1.83) |
| <b>Dose Analysis: &lt;= 300 MME</b>              |            |                |                    |            |                |                    |
| MAX                                              | 68 / 27495 | 2736 / 1532133 | 1.39 (1.09 - 1.76) | 68 / 27436 | 2716 / 1524384 | 1.02 (0.77 - 1.34) |
| MarketScan                                       | 10 / 3297  | 2854 / 1165222 | 1.24 (0.67 - 2.30) | 10 / 3296  | 2812 / 1152097 | 1.27 (0.68 - 2.38) |
| Pooled                                           | 78 / 30792 | 5590 / 2697355 | 1.36 (1.09 - 1.71) | 78 / 30732 | 5528 / 2676481 | 1.05 (0.82 - 1.36) |
| <b>Dose Analysis: &gt;300 MME - &lt;=600 MME</b> |            |                |                    |            |                |                    |
| MAX                                              | 38 / 14568 | 2736 / 1532133 | 1.46 (1.06 - 2.01) | 38 / 14483 | 2719 / 1523762 | 1.06 (0.74 - 1.52) |
| MarketScan                                       | 5 / 2133   | 2854 / 1165222 | 0.96 (0.40 - 2.30) | 5 / 2129   | 2765 / 1136288 | 1.02 (0.41 - 2.54) |
| Pooled                                           | 43 / 16701 | 5590 / 2697355 | 1.39 (1.03 - 1.88) | 43 / 16612 | 5484 / 2660050 | 1.06 (0.76 - 1.47) |
| <b>Dose Analysis: &gt;600 - &lt;=1200 MME</b>    |            |                |                    |            |                |                    |
| MAX                                              | 32 / 11337 | 2736 / 1532133 | 1.58 (1.12 - 2.24) | 32 / 11311 | 2736 / 1532132 | 1.09 (0.74 - 1.60) |
| MarketScan                                       | 4 / 1825   | 2854 / 1165222 | 0.89 (0.34 - 2.38) | 4 / 1818   | 2854 / 1165114 | 0.94 (0.33 - 2.68) |
| Pooled                                           | 36 / 13162 | 5590 / 2697355 | 1.48 (1.07 - 2.06) | 36 / 13129 | 5590 / 2697246 | 1.07 (0.74 - 1.54) |
| <b>Dose Analysis: &gt;1200 MME</b>               |            |                |                    |            |                |                    |
| MAX                                              | 38 / 15808 | 2736 / 1532133 | 1.35 (0.98 - 1.85) | 38 / 15759 | 2732 / 1528506 | 0.88 (0.60 - 1.31) |
| MarketScan                                       | 13 / 4685  | 2854 / 1165222 | 1.13 (0.66 - 1.95) | 13 / 4657  | 2807 / 1150112 | 1.09 (0.59 - 2.02) |
| Pooled                                           | 51 / 20493 | 5590 / 2697355 | 1.29 (0.98 - 1.70) | 51 / 20416 | 5539 / 2678618 | 0.94 (0.68 - 1.31) |

|                                                              |            |               |                    |            |               |                    |
|--------------------------------------------------------------|------------|---------------|--------------------|------------|---------------|--------------------|
| <b>E) NEURAL TUBE DEFECT</b>                                 |            |               |                    |            |               |                    |
| <b>Hd-PS estimate</b>                                        |            |               |                    |            |               |                    |
| MAX                                                          | N/A        | N/A           | N/A                | 28 / 70112 | 553 / 1532133 | 0.79 (0.48 - 1.30) |
| MarketScan                                                   | N/A        | N/A           | N/A                | 6 / 12427  | 424 / 1165221 | 1.10 (0.43 - 2.86) |
| Pooled                                                       | N/A        | N/A           | N/A                | 34 / 82539 | 977 / 2697354 | 0.85 (0.54 - 1.32) |
| <b>Discontinuers as referent</b>                             |            |               |                    |            |               |                    |
| MAX                                                          | 22 / 48279 | 101 / 223569  | 1.01 (0.64 - 1.60) | 22 / 48226 | 101 / 223454  | 0.75 (0.44 - 1.30) |
| MarketScan                                                   | 2 / 7451   | 40 / 92713    | 0.62 (0.15 - 2.57) | 2 / 7449   | 40 / 92436    | 0.73 (0.18 - 2.98) |
| Pooled                                                       | 24 / 55730 | 141 / 316282  | 0.96 (0.62 - 1.49) | 24 / 55675 | 141 / 315890  | 0.75 (0.45 - 1.25) |
| <b>Excluding women with aberrant opioid filling patterns</b> |            |               |                    |            |               |                    |
| MAX                                                          | 18 / 54800 | 553 / 1532133 | 0.91 (0.57 - 1.46) | 18 / 54735 | 553 / 1532114 | 0.64 (0.37 - 1.11) |
| MarketScan                                                   | 6 / 12016  | 424 / 1165222 | 1.37 (0.61 - 3.07) | 6 / 12006  | 420 / 1153073 | 1.11 (0.43 - 2.86) |
| Pooled                                                       | 24 / 66816 | 977 / 2697355 | 1.01 (0.67 - 1.51) | 24 / 66741 | 973 / 2685187 | 0.73 (0.45 - 1.19) |
| <b>Restriction to women with folate supplementation</b>      |            |               |                    |            |               |                    |

|                                       |              |                |                    |              |                |                    |
|---------------------------------------|--------------|----------------|--------------------|--------------|----------------|--------------------|
| MAX                                   | 12 / 37659   | 260 / 679575   | 0.83 (0.47 - 1.49) | 12 / 37659   | 260 / 678358   | 0.55 (0.25 - 1.23) |
| MarketScan                            | 1 / 4885     | 149 / 402624   | 0.55 (0.08 - 3.95) | 1 / 4874     | 147 / 396869   | 0.25 (0.01 - 5.30) |
| Pooled                                | 13 / 42544   | 409 / 1082199  | 0.81 (0.46 - 1.40) | 13 / 42533   | 407 / 1075227  | 0.53 (0.24 - 1.14) |
| <b>Late first trimester exposure</b>  |              |                |                    |              |                |                    |
| MAX                                   | 19 / 48148   | 553 / 1532133  | 1.09 (0.69 - 1.73) | 19 / 47982   | 553 / 1532133  | 0.87 (0.51 - 1.50) |
| MarketScan                            | 5 / 8052     | 424 / 1165222  | 1.71 (0.71 - 4.12) | 5 / 8033     | 417 / 1145452  | 1.73 (0.66 - 4.55) |
| Pooled                                | 24 / 56200   | 977 / 2697355  | 1.20 (0.80 - 1.80) | 24 / 56015   | 970 / 2677585  | 1.03 (0.64 - 1.65) |
| <b>Outcome assessment to 365 days</b> |              |                |                    |              |                |                    |
| MAX                                   | 27 / 56921   | 609 / 1238327  | 0.96 (0.66 - 1.42) | 27 / 56895   | 609 / 1237985  | 0.63 (0.43 - 0.92) |
| MarketScan                            | 6 / 8983     | 441 / 851107   | 1.29 (0.58 - 2.88) | 6 / 8983     | 438 / 847613   | 1.70 (0.76 - 3.81) |
| Pooled                                | 33 / 65904   | 1050 / 2089434 | 1.02 (0.72 - 1.44) | 33 / 65878   | 1047 / 2085598 | 0.75 (0.53 - 1.07) |
| <b>Negative control analysis</b>      |              |                |                    |              |                |                    |
| MAX                                   | <11* / 26147 | 478 / 1354414  | 0.76 (0.36 - 1.60) | <11* / 26147 | 477 / 1352772  | 0.65 (0.31 - 1.39) |
| MarketScan                            | 8 / 7695     | 382 / 1082135  | 2.95 (1.46 - 5.93) | 8 / 7695     | 382 / 1081268  | 2.68 (1.34 - 5.38) |
| Pooled                                | * / 33842    | 860 / 2436549  | 1.56 (0.94 - 2.60) | * / 33842    | 859 / 2434040  | 1.40 (0.84 - 2.34) |
| <b>Hydrocodone</b>                    |              |                |                    |              |                |                    |
| MAX                                   | 15 / 35259   | 553 / 1532133  | 1.18 (0.71 - 1.97) | 15 / 35066   | 551 / 1525321  | 0.78 (0.41 - 1.49) |
| MarketScan                            | 2 / 5775     | 424 / 1165222  | 0.95 (0.24 - 3.82) | 2 / 5774     | 421 / 1148210  | 0.98 (0.24 - 3.92) |
| Pooled                                | 17 / 41034   | 977 / 2697355  | 1.15 (0.71 - 1.86) | 17 / 40840   | 972 / 2673531  | 0.81 (0.45 - 1.46) |
| <b>Oxycodone</b>                      |              |                |                    |              |                |                    |
| MAX                                   | <11* / 7019  | 553 / 1532133  | 1.97 (0.82 - 4.76) | <11* / 6945  | 488 / 1357932  | 1.02 (0.34 - 3.01) |
| MarketScan                            | 0 / 1467     | 424 / 1165222  | N/A                | 0 / 1440     | 320 / 872696   | N/A                |
| Pooled                                | <11* / 8486  | 977 / 2697355  | N/A                | <11* / 8385  | 808 / 2230628  | N/A                |
| <b>Codeine</b>                        |              |                |                    |              |                |                    |
| MAX                                   | <11* / 9501  | 553 / 1532133  | 0.29 (0.04 - 2.07) | <11* / 9431  | 552 / 1520158  | 0.28 (0.04 - 1.85) |
| MarketScan                            | 0 / 1549     | 424 / 1165222  | N/A                | 0 / 1529     | 422 / 1155583  | N/A                |
| Pooled                                | <11* / 11050 | 977 / 2697355  | N/A                | <11* / 10960 | 974 / 2675741  | N/A                |
| <b>Dose Analysis: &lt;= 300 MME</b>   |              |                |                    |              |                |                    |
| MAX                                   | <11* / 27495 | 553 / 1532133  | 0.91 (0.47 - 1.75) | <11* / 27436 | 552 / 1524384  | 0.70 (0.34 - 1.45) |
| MarketScan                            | 2 / 3297     | 424 / 1165222  | 1.67 (0.42 - 6.68) | 2 / 3296     | 418 / 1152097  | 1.26 (0.29 - 5.46) |
| Pooled                                | * / 30792    | 977 / 2697355  | 1.01 (0.56 - 1.84) | * / 30732    | 970 / 2676481  | 0.79 (0.41 - 1.51) |

| <b>Dose Analysis: &gt;300 MME - &lt;=600 MME</b> |              |               |                     |              |               |                    |
|--------------------------------------------------|--------------|---------------|---------------------|--------------|---------------|--------------------|
| MAX                                              | <11* / 14568 | 553 / 1532133 | 0.76 (0.28 - 2.03)  | <11* / 14483 | 551 / 1523762 | 0.49 (0.16 - 1.47) |
| MarketScan                                       | 3 / 2133     | 424 / 1165222 | 3.87 (1.24 - 12.02) | 3 / 2129     | 415 / 1136288 | 2.74 (0.76 - 9.87) |
| Pooled                                           | * / 16701    | 977 / 2697355 | 1.53 (0.73 - 3.21)  | * / 16612    | 966 / 2660050 | 1.01 (0.44 - 2.34) |
| <b>Dose Analysis: &gt;600 - &lt;=1200 MME</b>    |              |               |                     |              |               |                    |
| MAX                                              | <11* / 11337 | 553 / 1532133 | 1.22 (0.51 - 2.95)  | <11* / 11311 | 553 / 1532132 | 0.73 (0.27 - 1.95) |
| MarketScan                                       | 0 / 1825     | 424 / 1165222 | N/A                 | 0 / 1818     | 424 / 1165114 | N/A                |
| Pooled                                           | <11* / 13162 | 977 / 2697355 | N/A                 | <11* / 13129 | 977 / 2697246 | N/A                |
| <b>Dose Analysis: &gt;1200 MME</b>               |              |               |                     |              |               |                    |
| MAX                                              | <11* / 15808 | 553 / 1532133 | 1.75 (0.94 - 3.28)  | <11* / 15759 | 553 / 1528506 | 1.13 (0.50 - 2.55) |
| MarketScan                                       | 1 / 4685     | 424 / 1165222 | 0.59 (0.08 - 4.17)  | 1 / 4657     | 418 / 1150112 | 0.80 (0.12 - 5.41) |
| Pooled                                           | * / 20493    | 977 / 2697355 | 1.58 (0.87 - 2.87)  | * / 20416    | 971 / 2678618 | 1.07 (0.51 - 2.27) |

| <b>F) CLUB FOOT</b>                                          |             |                |                    |             |                |                    |
|--------------------------------------------------------------|-------------|----------------|--------------------|-------------|----------------|--------------------|
| <b>Hd-PS estimate</b>                                        |             |                |                    |             |                |                    |
| MAX                                                          | N/A         | N/A            | N/A                | 154 / 70112 | 2356 / 1532133 | 1.28 (1.05 - 1.56) |
| MarketScan                                                   | N/A         | N/A            | N/A                | 20 / 12427  | 1781 / 1165221 | 0.82 (0.50 - 1.35) |
| Pooled                                                       | N/A         | N/A            | N/A                | 174 / 82539 | 4137 / 2697354 | 1.20 (1.00 - 1.44) |
| <b>Discontinuers as referent</b>                             |             |                |                    |             |                |                    |
| MAX                                                          | 119 / 48279 | 420 / 223569   | 1.31 (1.07 - 1.61) | 119 / 48226 | 420 / 223454   | 1.14 (0.89 - 1.46) |
| MarketScan                                                   | 12 / 7451   | 139 / 92713    | 1.07 (0.60 - 1.94) | 12 / 7449   | 139 / 92436    | 0.90 (0.48 - 1.68) |
| Pooled                                                       | 131 / 55730 | 559 / 316282   | 1.28 (1.06 - 1.56) | 131 / 55675 | 559 / 315890   | 1.10 (0.87 - 1.39) |
| <b>Excluding women with aberrant opioid filling patterns</b> |             |                |                    |             |                |                    |
| MAX                                                          | 120 / 54800 | 2356 / 1532133 | 1.42 (1.19 - 1.71) | 120 / 54735 | 2356 / 1532114 | 1.11 (0.90 - 1.38) |
| MarketScan                                                   | 20 / 12016  | 1781 / 1165222 | 1.09 (0.70 - 1.69) | 20 / 12006  | 1766 / 1153073 | 0.89 (0.55 - 1.45) |
| Pooled                                                       | 140 / 66816 | 4137 / 2697355 | 1.37 (1.16 - 1.62) | 140 / 66741 | 4122 / 2685187 | 1.07 (0.88 - 1.31) |
| <b>Restriction to women with folate supplementation</b>      |             |                |                    |             |                |                    |
| MAX                                                          | 92 / 37659  | 1121 / 679575  | 1.48 (1.20 - 1.83) | 92 / 37659  | 1121 / 678358  | 1.12 (0.86 - 1.47) |
| MarketScan                                                   | 8 / 4885    | 621 / 402624   | 1.06 (0.53 - 2.13) | 8 / 4874    | 614 / 396869   | 1.06 (0.52 - 2.17) |
| Pooled                                                       | 100 / 42544 | 1742 / 1082199 | 1.44 (1.18 - 1.76) | 100 / 42533 | 1735 / 1075227 | 1.11 (0.86 - 1.44) |
| <b>Late first trimester exposure</b>                         |             |                |                    |             |                |                    |



|                                                  |             |                |                    |             |                |                    |
|--------------------------------------------------|-------------|----------------|--------------------|-------------|----------------|--------------------|
| MAX                                              | 106 / 48148 | 2356 / 1532133 | 1.43 (1.18 - 1.74) | 105 / 47982 | 2356 / 1532133 | 1.10 (0.87 - 1.39) |
| MarketScan                                       | 13 / 8052   | 1781 / 1165222 | 1.06 (0.61 - 1.82) | 13 / 8033   | 1750 / 1145452 | 0.87 (0.48 - 1.59) |
| Pooled                                           | 119 / 56200 | 4137 / 2697355 | 1.38 (1.15 - 1.66) | 118 / 56015 | 4106 / 2677585 | 1.07 (0.86 - 1.33) |
| <b>Outcome assessment to 365 days</b>            |             |                |                    |             |                |                    |
| MAX                                              | 164 / 56921 | 2495 / 1238327 | 1.43 (1.22 - 1.67) | 164 / 56895 | 2495 / 1237985 | 1.36 (1.16 - 1.59) |
| MarketScan                                       | 18 / 8983   | 1601 / 851107  | 1.07 (0.67 - 1.69) | 18 / 8983   | 1595 / 847613  | 0.84 (0.53 - 1.34) |
| Pooled                                           | 182 / 65904 | 4096 / 2089434 | 1.39 (1.19 - 1.61) | 182 / 65878 | 4090 / 2085598 | 1.29 (1.11 - 1.50) |
| <b>Negative control analysis</b>                 |             |                |                    |             |                |                    |
| MAX                                              | 50 / 26147  | 2062 / 1354414 | 1.26 (0.95 - 1.66) | 50 / 26147  | 2060 / 1352772 | 1.15 (0.86 - 1.52) |
| MarketScan                                       | 7 / 7695    | 1647 / 1082135 | 0.60 (0.28 - 1.26) | 7 / 7695    | 1646 / 1081268 | 0.57 (0.27 - 1.20) |
| Pooled                                           | 57 / 33842  | 3709 / 2436549 | 1.14 (0.88 - 1.49) | 57 / 33842  | 3706 / 2434040 | 1.05 (0.81 - 1.37) |
| <b>Hydrocodone</b>                               |             |                |                    |             |                |                    |
| MAX                                              | 93 / 35259  | 2356 / 1532133 | 1.72 (1.39 - 2.11) | 93 / 35066  | 2351 / 1525321 | 1.26 (0.96 - 1.65) |
| MarketScan                                       | 9 / 5775    | 1781 / 1165222 | 1.02 (0.53 - 1.96) | 9 / 5774    | 1765 / 1148210 | 0.80 (0.39 - 1.64) |
| Pooled                                           | 102 / 41034 | 4137 / 2697355 | 1.64 (1.34 - 1.99) | 102 / 40840 | 4116 / 2673531 | 1.19 (0.92 - 1.53) |
| <b>Oxycodone</b>                                 |             |                |                    |             |                |                    |
| MAX                                              | 14 / 7019   | 2356 / 1532133 | 1.30 (0.77 - 2.19) | 14 / 6945   | 2103 / 1357932 | 0.74 (0.35 - 1.55) |
| MarketScan                                       | 4 / 1467    | 1781 / 1165222 | 1.78 (0.67 - 4.75) | 4 / 1440    | 1362 / 872696  | 1.52 (0.46 - 5.00) |
| Pooled                                           | 18 / 8486   | 4137 / 2697355 | 1.39 (0.88 - 2.21) | 18 / 8385   | 3465 / 2230628 | 0.91 (0.48 - 1.70) |
| <b>Codeine</b>                                   |             |                |                    |             |                |                    |
| MAX                                              | 17 / 9501   | 2356 / 1532133 | 1.16 (0.72 - 1.87) | 17 / 9431   | 2335 / 1520158 | 1.01 (0.62 - 1.63) |
| MarketScan                                       | 3 / 1549    | 1781 / 1165222 | 1.27 (0.41 - 3.93) | 3 / 1529    | 1764 / 1155583 | 1.10 (0.35 - 3.47) |
| Pooled                                           | 20 / 11050  | 4137 / 2697355 | 1.18 (0.76 - 1.83) | 20 / 10960  | 4099 / 2675741 | 1.02 (0.65 - 1.59) |
| <b>Dose Analysis: &lt;= 300 MME</b>              |             |                |                    |             |                |                    |
| MAX                                              | 50 / 27495  | 2356 / 1532133 | 1.18 (0.89 - 1.56) | 50 / 27436  | 2344 / 1524384 | 1.00 (0.74 - 1.34) |
| MarketScan                                       | 5 / 3297    | 1781 / 1165222 | 0.99 (0.41 - 2.39) | 5 / 3296    | 1762 / 1152097 | 0.89 (0.37 - 2.13) |
| Pooled                                           | 55 / 30792  | 4137 / 2697355 | 1.16 (0.89 - 1.52) | 55 / 30732  | 4106 / 2676481 | 0.98 (0.74 - 1.31) |
| <b>Dose Analysis: &gt;300 MME - &lt;=600 MME</b> |             |                |                    |             |                |                    |
| MAX                                              | 37 / 14568  | 2356 / 1532133 | 1.65 (1.19 - 2.28) | 37 / 14483  | 2345 / 1523762 | 1.30 (0.90 - 1.86) |
| MarketScan                                       | 4 / 2133    | 1781 / 1165222 | 1.23 (0.46 - 3.27) | 4 / 2129    | 1741 / 1136288 | 1.01 (0.37 - 2.77) |
| Pooled                                           | 41 / 16701  | 4137 / 2697355 | 1.60 (1.18 - 2.18) | 41 / 16612  | 4086 / 2660050 | 1.26 (0.90 - 1.77) |

| <b>Dose Analysis: &gt;600 - &lt;=1200 MME</b> |            |                |                    |            |                |                    |
|-----------------------------------------------|------------|----------------|--------------------|------------|----------------|--------------------|
| MAX                                           | 28 / 11337 | 2356 / 1532133 | 1.61 (1.11 - 2.33) | 28 / 11311 | 2356 / 1532132 | 1.22 (0.78 - 1.89) |
| MarketScan                                    | 0 / 1825   | 1781 / 1165222 | N/A                | 0 / 1818   | 1780 / 1165114 | N/A                |
| Pooled                                        | 28 / 13162 | 4137 / 2697355 | N/A                | 28 / 13129 | 4136 / 2697246 | N/A                |
| <b>Dose Analysis: &gt;1200 MME</b>            |            |                |                    |            |                |                    |
| MAX                                           | 39 / 15808 | 2356 / 1532133 | 1.60 (1.17 - 2.20) | 39 / 15759 | 2354 / 1528506 | 1.22 (0.81 - 1.83) |
| MarketScan                                    | 10 / 4685  | 1781 / 1165222 | 1.40 (0.75 - 2.60) | 10 / 4657  | 1763 / 1150112 | 1.05 (0.50 - 2.19) |
| Pooled                                        | 49 / 20493 | 4137 / 2697355 | 1.56 (1.18 - 2.07) | 49 / 20416 | 4117 / 2678618 | 1.18 (0.82 - 1.68) |

| <b>G) ORAL CLEFT</b>                                         |             |                |                    |             |                |                    |
|--------------------------------------------------------------|-------------|----------------|--------------------|-------------|----------------|--------------------|
| <b>Hd-PS estimate</b>                                        |             |                |                    |             |                |                    |
| MAX                                                          | N/A         | N/A            | N/A                | 109 / 70112 | 1702 / 1532133 | 1.12 (0.89 - 1.42) |
| MarketScan                                                   | N/A         | N/A            | N/A                | 28 / 12427  | 1441 / 1165221 | 1.69 (1.13 - 2.51) |
| Pooled                                                       | N/A         | N/A            | N/A                | 137 / 82539 | 3143 / 2697354 | 1.25 (1.02 - 1.52) |
| <b>Discontinuers as referent</b>                             |             |                |                    |             |                |                    |
| MAX                                                          | 87 / 48279  | 281 / 223569   | 1.43 (1.13 - 1.82) | 87 / 48226  | 281 / 223454   | 1.17 (0.88 - 1.55) |
| MarketScan                                                   | 16 / 7451   | 103 / 92713    | 1.93 (1.14 - 3.27) | 16 / 7449   | 103 / 92436    | 1.61 (0.93 - 2.78) |
| Pooled                                                       | 103 / 55730 | 384 / 316282   | 1.51 (1.21 - 1.90) | 103 / 55675 | 384 / 315890   | 1.25 (0.97 - 1.62) |
| <b>Excluding women with aberrant opioid filling patterns</b> |             |                |                    |             |                |                    |
| MAX                                                          | 86 / 54800  | 1702 / 1532133 | 1.41 (1.14 - 1.75) | 86 / 54735  | 1702 / 1532114 | 1.13 (0.88 - 1.45) |
| MarketScan                                                   | 26 / 12016  | 1441 / 1165222 | 1.75 (1.19 - 2.58) | 26 / 12006  | 1421 / 1153073 | 1.62 (1.05 - 2.49) |
| Pooled                                                       | 112 / 66816 | 3143 / 2697355 | 1.49 (1.23 - 1.80) | 112 / 66741 | 3123 / 2685187 | 1.24 (0.99 - 1.54) |
| <b>Restriction to women with folate supplementation</b>      |             |                |                    |             |                |                    |
| MAX                                                          | 61 / 37659  | 814 / 679575   | 1.35 (1.04 - 1.75) | 61 / 37659  | 813 / 678358   | 1.04 (0.75 - 1.43) |
| MarketScan                                                   | 10 / 4885   | 493 / 402624   | 1.67 (0.89 - 3.12) | 10 / 4874   | 483 / 396869   | 1.70 (0.81 - 3.58) |
| Pooled                                                       | 71 / 42544  | 1307 / 1082199 | 1.40 (1.10 - 1.77) | 71 / 42533  | 1296 / 1075227 | 1.12 (0.84 - 1.51) |
| <b>Late first trimester exposure</b>                         |             |                |                    |             |                |                    |
| MAX                                                          | 77 / 48148  | 1702 / 1532133 | 1.44 (1.15 - 1.81) | 77 / 47982  | 1702 / 1532133 | 1.25 (0.95 - 1.64) |
| MarketScan                                                   | 17 / 8052   | 1441 / 1165222 | 1.71 (1.06 - 2.75) | 17 / 8033   | 1414 / 1145452 | 1.59 (0.94 - 2.71) |
| Pooled                                                       | 94 / 56200  | 3143 / 2697355 | 1.49 (1.21 - 1.83) | 94 / 56015  | 3116 / 2677585 | 1.32 (1.03 - 1.68) |
| <b>Outcome assessment to 365 days</b>                        |             |                |                    |             |                |                    |

|                                                  |             |                |                    |             |                |                    |
|--------------------------------------------------|-------------|----------------|--------------------|-------------|----------------|--------------------|
| MAX                                              | 92 / 56921  | 1610 / 1238327 | 1.24 (1.01 - 1.53) | 92 / 56895  | 1609 / 1237985 | 1.11 (0.90 - 1.37) |
| MarketScan                                       | 24 / 8983   | 1204 / 851107  | 1.89 (1.26 - 2.83) | 24 / 8983   | 1198 / 847613  | 1.91 (1.28 - 2.86) |
| Pooled                                           | 116 / 65904 | 2814 / 2089434 | 1.36 (1.13 - 1.64) | 116 / 65878 | 2807 / 2085598 | 1.25 (1.04 - 1.50) |
| <b>Negative control analysis</b>                 |             |                |                    |             |                |                    |
| MAX                                              | 36 / 26147  | 1473 / 1354414 | 1.27 (0.91 - 1.76) | 36 / 26147  | 1472 / 1352772 | 1.08 (0.78 - 1.51) |
| MarketScan                                       | 9 / 7695    | 1336 / 1082135 | 0.95 (0.49 - 1.82) | 9 / 7695    | 1335 / 1081268 | 0.89 (0.46 - 1.73) |
| Pooled                                           | 45 / 33842  | 2809 / 2436549 | 1.19 (0.89 - 1.60) | 45 / 33842  | 2807 / 2434040 | 1.04 (0.77 - 1.40) |
| <b>Hydrocodone</b>                               |             |                |                    |             |                |                    |
| MAX                                              | 65 / 35259  | 1702 / 1532133 | 1.66 (1.30 - 2.13) | 65 / 35066  | 1697 / 1525321 | 1.31 (0.96 - 1.79) |
| MarketScan                                       | 14 / 5775   | 1441 / 1165222 | 1.96 (1.16 - 3.32) | 14 / 5774   | 1415 / 1148210 | 1.68 (0.97 - 2.90) |
| Pooled                                           | 79 / 41034  | 3143 / 2697355 | 1.71 (1.37 - 2.14) | 79 / 40840  | 3112 / 2673531 | 1.39 (1.06 - 1.83) |
| <b>Oxycodone</b>                                 |             |                |                    |             |                |                    |
| MAX                                              | 11 / 7019   | 1702 / 1532133 | 1.41 (0.78 - 2.55) | 11 / 6945   | 1504 / 1357932 | 0.82 (0.37 - 1.80) |
| MarketScan                                       | 5 / 1467    | 1441 / 1165222 | 2.76 (1.15 - 6.62) | 5 / 1440    | 1086 / 872696  | 2.98 (1.09 - 8.18) |
| Pooled                                           | 16 / 8486   | 3143 / 2697355 | 1.74 (1.07 - 2.84) | 16 / 8385   | 2590 / 2230628 | 1.34 (0.72 - 2.50) |
| <b>Codeine</b>                                   |             |                |                    |             |                |                    |
| MAX                                              | <11* / 9501 | 1702 / 1532133 | 0.76 (0.38 - 1.52) | <11* / 9431 | 1690 / 1520158 | 0.56 (0.27 - 1.17) |
| MarketScan                                       | 3 / 1549    | 1441 / 1165222 | 1.57 (0.51 - 4.86) | 3 / 1529    | 1430 / 1155583 | 1.39 (0.46 - 4.21) |
| Pooled                                           | * / 11050   | 3143 / 2697355 | 0.93 (0.51 - 1.67) | * / 10960   | 3120 / 2675741 | 0.74 (0.40 - 1.37) |
| <b>Dose Analysis: &lt;= 300 MME</b>              |             |                |                    |             |                |                    |
| MAX                                              | 33 / 27495  | 1702 / 1532133 | 1.08 (0.77 - 1.52) | 33 / 27436  | 1696 / 1524384 | 0.93 (0.66 - 1.33) |
| MarketScan                                       | 4 / 3297    | 1441 / 1165222 | 0.98 (0.37 - 2.62) | 4 / 3296    | 1422 / 1152097 | 0.94 (0.36 - 2.49) |
| Pooled                                           | 37 / 30792  | 3143 / 2697355 | 1.07 (0.77 - 1.48) | 37 / 30732  | 3118 / 2676481 | 0.94 (0.67 - 1.31) |
| <b>Dose Analysis: &gt;300 MME - &lt;=600 MME</b> |             |                |                    |             |                |                    |
| MAX                                              | 29 / 14568  | 1702 / 1532133 | 1.79 (1.24 - 2.59) | 29 / 14483  | 1697 / 1523762 | 1.20 (0.76 - 1.88) |
| MarketScan                                       | 6 / 2133    | 1441 / 1165222 | 2.27 (1.02 - 5.07) | 6 / 2129    | 1394 / 1136288 | 2.19 (0.94 - 5.12) |
| Pooled                                           | 35 / 16701  | 3143 / 2697355 | 1.87 (1.34 - 2.61) | 35 / 16612  | 3091 / 2660050 | 1.37 (0.92 - 2.04) |
| <b>Dose Analysis: &gt;600 - &lt;=1200 MME</b>    |             |                |                    |             |                |                    |
| MAX                                              | 17 / 11337  | 1702 / 1532133 | 1.35 (0.84 - 2.18) | 17 / 11311  | 1702 / 1532132 | 1.03 (0.61 - 1.75) |
| MarketScan                                       | 7 / 1825    | 1441 / 1165222 | 3.10 (1.48 - 6.51) | 7 / 1818    | 1441 / 1165114 | 2.97 (1.36 - 6.46) |
| Pooled                                           | 24 / 13162  | 3143 / 2697355 | 1.72 (1.15 - 2.57) | 24 / 13129  | 3143 / 2697246 | 1.44 (0.93 - 2.24) |

| <b>Dose Analysis: &gt;1200 MME</b> |            |                |                    |            |                |                    |
|------------------------------------|------------|----------------|--------------------|------------|----------------|--------------------|
| MAX                                | 29 / 15808 | 1702 / 1532133 | 1.65 (1.14 - 2.38) | 29 / 15759 | 1699 / 1528506 | 1.24 (0.76 - 2.02) |
| MarketScan                         | 9 / 4685   | 1441 / 1165222 | 1.55 (0.81 - 2.99) | 9 / 4657   | 1420 / 1150112 | 1.56 (0.75 - 3.22) |
| Pooled                             | 38 / 20493 | 3143 / 2697355 | 1.63 (1.18 - 2.24) | 38 / 20416 | 3119 / 2678618 | 1.33 (0.89 - 2.00) |

\* Cell size <11 for MAX cohort. Numbers suppressed in accord with the CMS cell size suppression policy.

Abbreviations: Hd-PS, High-dimensional propensity score; MME, morphine milligram equivalent; N/A, not applicable; no., number.

eTable 7 Risk of Congenital Malformations (Oral Cleft Subgroups) in Infants Following Exposure to Opioids During the First Trimester: Sensitivity Analyses.

|                                                              | Propensity Score Weighted               |                                         |                        |
|--------------------------------------------------------------|-----------------------------------------|-----------------------------------------|------------------------|
|                                                              | Exposed to Opioids                      | Unexposed                               | Relative Risk (95% CI) |
|                                                              | No. of Events /<br>Total No. Of Infants | No. of Events /<br>Total No. Of Infants |                        |
| <b>A) CLEFT PALATE</b>                                       |                                         |                                         |                        |
| <b>Main analysis (adjusted)</b>                              |                                         |                                         |                        |
| MAX                                                          | 64 / 70,074                             | 827 / 1,532,118                         | 1.33 (0.95 - 1.87)     |
| MarketScan                                                   | 21 / 12,430                             | 716 / 1,152,470                         | 2.50 (1.52 - 4.10)     |
| Pooled                                                       | 85 / 82,504                             | 1,543 / 2,684,588                       | 1.62 (1.23 - 2.14)     |
| <b>Hd-PS estimate</b>                                        |                                         |                                         |                        |
| MAX                                                          | 64 / 70,112                             | 827 / 1,532,133                         | 1.40 (1.02 - 1.90)     |
| MarketScan                                                   | 21 / 12,427                             | 732 / 1,165,221                         | 2.36 (1.46 - 3.80)     |
| Pooled                                                       | 85 / 82,539                             | 1,559 / 2,697,354                       | 1.63 (1.26 - 2.11)     |
| <b>Discontinuers as referent</b>                             |                                         |                                         |                        |
| MAX                                                          | 50 / 48,226                             | 153 / 223,454                           | 1.25 (0.85 - 1.84)     |
| MarketScan                                                   | 12 / 7,449                              | 50 / 92,436                             | 2.63 (1.34 - 5.14)     |
| Pooled                                                       | 62 / 55,675                             | 203 / 315,890                           | 1.51 (1.08 - 2.10)     |
| <b>Excluding women with aberrant opioid filling patterns</b> |                                         |                                         |                        |
| MAX                                                          | 47 / 54,735                             | 827 / 1,532,114                         | 1.36 (0.96 - 1.91)     |
| MarketScan                                                   | 19 / 12,006                             | 717 / 1,153,073                         | 2.29 (1.35 - 3.87)     |
| Pooled                                                       | 66 / 66,741                             | 1,544 / 2,685,187                       | 1.59 (1.19 - 2.11)     |
| <b>Restriction to women with folate supplementation</b>      |                                         |                                         |                        |
| MAX                                                          | 39 / 37,659                             | 397 / 678,358                           | 1.40 (0.93 - 2.11)     |
| MarketScan                                                   | 9 / 4,874                               | 247 / 396,869                           | 2.58 (1.12 - 5.97)     |
| Pooled                                                       | 48 / 42,533                             | 644 / 1,075,227                         | 1.58 (1.09 - 2.28)     |
| <b>Late first trimester exposure</b>                         |                                         |                                         |                        |
| MAX                                                          | 46 / 47,982                             | 827 / 1,532,133                         | 1.50 (1.04 - 2.17)     |
| MarketScan                                                   | 13 / 8,033                              | 711 / 1,145,452                         | 2.39 (1.26 - 4.53)     |
| Pooled                                                       | 59 / 56,015                             | 1,538 / 2,677,585                       | 1.69 (1.22 - 2.32)     |
| <b>Outcome assessment to 365 days</b>                        |                                         |                                         |                        |
| MAX                                                          | 60 / 56,895                             | 965 / 1,237,985                         | 1.20 (0.86 - 1.67)     |
| MarketScan                                                   | 15 / 8,983                              | 509 / 847,613                           | 2.79 (1.51 - 5.17)     |
| Pooled                                                       | 75 / 65,878                             | 1,474 / 2,085,598                       | 1.45 (1.08 - 1.94)     |
| <b>Negative control analysis</b>                             |                                         |                                         |                        |
| MAX                                                          | 20 / 26,147                             | 712 / 1,352,772                         | 1.25 (0.80 - 1.95)     |
| MarketScan                                                   | 7 / 7,695                               | 683 / 1,081,268                         | 1.35 (0.64 - 2.85)     |
| Pooled                                                       | 27 / 33,842                             | 1,395 / 2,434,040                       | 1.28 (0.87 - 1.87)     |
| <b>Hydrocodone</b>                                           |                                         |                                         |                        |
| MAX                                                          | 42 / 35,066                             | 825 / 1,525,321                         | 1.72 (1.13 - 2.62)     |
| MarketScan                                                   | 10 / 5,774                              | 715 / 1,148,210                         | 2.49 (1.23 - 5.05)     |
| Pooled                                                       | 52 / 40,840                             | 1,540 / 2,673,531                       | 1.89 (1.32 - 2.72)     |

| <b>Oxycodone</b>                                             |               |                   |                     |
|--------------------------------------------------------------|---------------|-------------------|---------------------|
| MAX                                                          | <11* / 6,945  | 740 / 1,357,932   | 1.32 (0.45 - 3.83)  |
| MarketScan                                                   | 3 / 1,440     | 570 / 872,696     | 3.69 (0.88 - 15.48) |
| Pooled                                                       | <11* / 8,385  | 1,310 / 2,230,628 | 1.90 (0.81 - 4.47)  |
| <b>Codeine</b>                                               |               |                   |                     |
| MAX                                                          | <11* / 9,431  | 820 / 1,520,158   | 1.03 (0.45 - 2.35)  |
| MarketScan                                                   | 2 / 1,529     | 724 / 1,155,583   | 2.11 (0.53 - 8.36)  |
| Pooled                                                       | <11* / 10,960 | 1,544 / 2,675,741 | 1.24 (0.61 - 2.53)  |
| <b>Dose Analysis: &lt;= 300 MME</b>                          |               |                   |                     |
| MAX                                                          | 17 / 27,436   | 825 / 1,524,384   | 1.05 (0.64 - 1.73)  |
| MarketScan                                                   | 2 / 3,296     | 719 / 1,152,097   | 0.94 (0.24 - 3.74)  |
| Pooled                                                       | 19 / 30,732   | 1,544 / 2,676,481 | 1.04 (0.65 - 1.66)  |
| <b>Dose Analysis: &gt;300 MME - &lt;=600 MME</b>             |               |                   |                     |
| MAX                                                          | 15 / 14,483   | 825 / 1,523,762   | 1.21 (0.60 - 2.42)  |
| MarketScan                                                   | 4 / 2,129     | 702 / 1,136,288   | 2.94 (1.07 - 8.07)  |
| Pooled                                                       | 19 / 16,612   | 1,527 / 2,660,050 | 1.61 (0.91 - 2.85)  |
| <b>Dose Analysis: &gt;600 - &lt;=1200 MME</b>                |               |                   |                     |
| MAX                                                          | <11* / 11,311 | 827 / 1,532,132   | 1.28 (0.63 - 2.61)  |
| MarketScan                                                   | 7 / 1,818     | 732 / 1,165,114   | 6.32 (2.77 - 14.40) |
| Pooled                                                       | * / 13,129    | 1,559 / 2,697,246 | 2.54 (1.48 - 4.35)  |
| <b>Dose Analysis: &gt;1200 MME</b>                           |               |                   |                     |
| MAX                                                          | 23 / 15,759   | 827 / 1,528,506   | 2.19 (1.21 - 3.97)  |
| MarketScan                                                   | 6 / 4,657     | 721 / 1,150,112   | 2.05 (0.80 - 5.26)  |
| Pooled                                                       | 29 / 20,416   | 1,548 / 2,678,618 | 2.15 (1.30 - 3.55)  |
| <b>B) CLEFT LIP</b>                                          |               |                   |                     |
| <b>Main analysis (adjusted)</b>                              |               |                   |                     |
| MAX                                                          | 33 / 70,074   | 530 / 1,532,118   | 0.98 (0.64 - 1.52)  |
| MarketScan                                                   | 6 / 12,430    | 467 / 1,152,470   | 1.18 (0.51 - 2.75)  |
| Pooled                                                       | 39 / 82,504   | 997 / 2,684,588   | 1.02 (0.69 - 1.51)  |
| <b>Hd-PS estimate</b>                                        |               |                   |                     |
| MAX                                                          | 33 / 70,112   | 530 / 1,532,133   | 0.99 (0.65 - 1.52)  |
| MarketScan                                                   | 6 / 12,427    | 472 / 1,165,221   | 1.25 (0.54 - 2.87)  |
| Pooled                                                       | 39 / 82,539   | 1,002 / 2,697,354 | 1.04 (0.71 - 1.52)  |
| <b>Discontinuers as referent</b>                             |               |                   |                     |
| MAX                                                          | 24 / 48,226   | 84 / 223,454      | 1.21 (0.70 - 2.08)  |
| MarketScan                                                   | 2 / 7,449     | 32 / 92,436       | 0.75 (0.17 - 3.34)  |
| Pooled                                                       | 26 / 55,675   | 116 / 315,890     | 1.14 (0.69 - 1.90)  |
| <b>Excluding women with aberrant opioid filling patterns</b> |               |                   |                     |
| MAX                                                          | 30 / 54,735   | 530 / 1,532,114   | 1.09 (0.70 - 1.70)  |
| MarketScan                                                   | 6 / 12,006    | 467 / 1,153,073   | 1.29 (0.54 - 3.06)  |
| Pooled                                                       | 36 / 66,741   | 997 / 2,685,187   | 1.13 (0.76 - 1.68)  |
| <b>Restriction to women with folate supplementation</b>      |               |                   |                     |

|                                                  |               |                   |                     |
|--------------------------------------------------|---------------|-------------------|---------------------|
| MAX                                              | 21 / 37,659   | 257 / 678,358     | 1.23 (0.71 - 2.13)  |
| MarketScan                                       | 1 / 4,874     | 173 / 396,869     | 0.77 (0.11 - 5.68)  |
| Pooled                                           | 22 / 42,533   | 430 / 1,075,227   | 1.19 (0.70 - 2.02)  |
| <b>Late first trimester exposure</b>             |               |                   |                     |
| MAX                                              | 20 / 47,982   | 530 / 1,532,133   | 1.09 (0.67 - 1.78)  |
| MarketScan                                       | 4 / 8,033     | 466 / 1,145,452   | 1.24 (0.43 - 3.52)  |
| Pooled                                           | 24 / 56,015   | 996 / 2,677,585   | 1.12 (0.72 - 1.74)  |
| <b>Outcome assessment to 365 days</b>            |               |                   |                     |
| MAX                                              | 34 / 56,895   | 635 / 1,237,985   | 1.03 (0.68 - 1.58)  |
| MarketScan                                       | 4 / 8,983     | 341 / 847,613     | 1.26 (0.44 - 3.61)  |
| Pooled                                           | 38 / 65,878   | 976 / 2,085,598   | 1.06 (0.71 - 1.58)  |
| <b>Negative control analysis</b>                 |               |                   |                     |
| MAX                                              | 11 / 26,147   | 463 / 1,352,772   | 1.01 (0.55 - 1.85)  |
| MarketScan                                       | 0 / 7,695     | 437 / 1,081,268   | N/A                 |
| Pooled                                           | 11 / 33,842   | 900 / 2,434,040   | 1.01 (0.55 - 1.85)  |
| <b>Hydrocodone</b>                               |               |                   |                     |
| MAX                                              | 19 / 35,066   | 528 / 1,525,321   | 1.18 (0.70 - 1.99)  |
| MarketScan                                       | 3 / 5,774     | 463 / 1,148,210   | 1.10 (0.38 - 3.25)  |
| Pooled                                           | 22 / 40,840   | 991 / 2,673,531   | 1.16 (0.73 - 1.86)  |
| <b>Oxycodone</b>                                 |               |                   |                     |
| MAX                                              | <11* / 6,945  | 461 / 1,357,932   | 0.73 (0.22 - 2.43)  |
| MarketScan                                       | 1 / 1,440     | 342 / 872,696     | 1.71 (0.22 - 13.17) |
| Pooled                                           | <11* / 8,385  | 803 / 2,230,628   | 0.91 (0.32 - 2.56)  |
| <b>Codeine</b>                                   |               |                   |                     |
| MAX                                              | <11* / 9,431  | 523 / 1,520,158   | 0.26 (0.04 - 1.63)  |
| MarketScan                                       | 0 / 1,529     | 467 / 1,155,583   | N/A                 |
| Pooled                                           | <11* / 10,960 | 990 / 2,675,741   | 0.26 (0.04 - 1.63)  |
| <b>Dose Analysis: &lt;= 300 MME</b>              |               |                   |                     |
| MAX                                              | 17 / 27,436   | 526 / 1,524,384   | 1.52 (0.93 - 2.48)  |
| MarketScan                                       | 1 / 3,296     | 465 / 1,152,097   | 0.72 (0.10 - 4.99)  |
| Pooled                                           | 18 / 30,732   | 991 / 2,676,481   | 1.45 (0.90 - 2.34)  |
| <b>Dose Analysis: &gt;300 MME - &lt;=600 MME</b> |               |                   |                     |
| MAX                                              | <11* / 14,483 | 527 / 1,523,762   | 0.51 (0.17 - 1.51)  |
| MarketScan                                       | 2 / 2,129     | 457 / 1,136,288   | 2.32 (0.52 - 10.37) |
| Pooled                                           | <11* / 16,612 | 984 / 2,660,050   | 0.86 (0.36 - 2.07)  |
| <b>Dose Analysis: &gt;600 - &lt;=1200 MME</b>    |               |                   |                     |
| MAX                                              | <11* / 11,311 | 530 / 1,532,132   | 0.98 (0.41 - 2.35)  |
| MarketScan                                       | 0 / 1,818     | 472 / 1,165,114   | N/A                 |
| Pooled                                           | <11* / 13,129 | 1,002 / 2,697,246 | 0.98 (0.41 - 2.35)  |
| <b>Dose Analysis: &gt;1200 MME</b>               |               |                   |                     |
| MAX                                              | <11* / 15,759 | 529 / 1,528,506   | 0.22 (0.05 - 1.04)  |
| MarketScan                                       | 3 / 4,657     | 465 / 1,150,112   | 1.80 (0.54 - 6.00)  |

|                                                              |               |                   |                    |
|--------------------------------------------------------------|---------------|-------------------|--------------------|
| Pooled                                                       | <11* / 20,416 | 994 / 2,678,618   | 0.82 (0.32 - 2.12) |
| <b>C) CLEFT PALATE WITH CLEFT LIP</b>                        |               |                   |                    |
| <b>Main analysis (adjusted)</b>                              |               |                   |                    |
| MAX                                                          | 48 / 70,074   | 802 / 1,532,118   | 1.05 (0.74 - 1.49) |
| MarketScan                                                   | 10 / 12,430   | 595 / 1,152,470   | 1.20 (0.61 - 2.36) |
| Pooled                                                       | 58 / 82,504   | 1,397 / 2,684,588 | 1.08 (0.79 - 1.47) |
| <b>Hd-PS estimate</b>                                        |               |                   |                    |
| MAX                                                          | 48 / 70,112   | 802 / 1,532,133   | 1.11 (0.79 - 1.56) |
| MarketScan                                                   | 10 / 12,427   | 602 / 1,165,221   | 1.15 (0.61 - 2.17) |
| Pooled                                                       | 58 / 82,539   | 1,404 / 2,697,354 | 1.12 (0.83 - 1.51) |
| <b>Discontinuers as referent</b>                             |               |                   |                    |
| MAX                                                          | 38 / 48,226   | 136 / 223,454     | 1.05 (0.69 - 1.58) |
| MarketScan                                                   | 6 / 7,449     | 50 / 92,436       | 1.06 (0.46 - 2.47) |
| Pooled                                                       | 44 / 55,675   | 186 / 315,890     | 1.05 (0.73 - 1.52) |
| <b>Excluding women with aberrant opioid filling patterns</b> |               |                   |                    |
| MAX                                                          | 43 / 54,735   | 802 / 1,532,114   | 1.16 (0.81 - 1.65) |
| MarketScan                                                   | 9 / 12,006    | 595 / 1,153,073   | 1.08 (0.52 - 2.21) |
| Pooled                                                       | 52 / 66,741   | 1,397 / 2,685,187 | 1.14 (0.83 - 1.57) |
| <b>Restriction to women with folate supplementation</b>      |               |                   |                    |
| MAX                                                          | 27 / 37,659   | 371 / 678,358     | 0.95 (0.59 - 1.53) |
| MarketScan                                                   | 3 / 4,874     | 191 / 396,869     | 1.06 (0.28 - 4.01) |
| Pooled                                                       | 30 / 42,533   | 562 / 1,075,227   | 0.96 (0.61 - 1.51) |
| <b>Late first trimester exposure</b>                         |               |                   |                    |
| MAX                                                          | 32 / 47,982   | 802 / 1,532,133   | 1.21 (0.82 - 1.79) |
| MarketScan                                                   | 6 / 8,033     | 594 / 1,145,452   | 1.07 (0.45 - 2.54) |
| Pooled                                                       | 38 / 56,015   | 1,396 / 2,677,585 | 1.18 (0.83 - 1.69) |
| <b>Outcome assessment to 365 days</b>                        |               |                   |                    |
| MAX                                                          | 44 / 56,895   | 776 / 1,237,985   | 0.96 (0.67 - 1.39) |
| MarketScan                                                   | 8 / 8,983     | 448 / 847,613     | 1.27 (0.59 - 2.74) |
| Pooled                                                       | 52 / 65,878   | 1,224 / 2,085,598 | 1.01 (0.72 - 1.41) |
| <b>Negative control analysis</b>                             |               |                   |                    |
| MAX                                                          | 13 / 26,147   | 697 / 1,352,772   | 0.82 (0.47 - 1.43) |
| MarketScan                                                   | 2 / 7,695     | 550 / 1,081,268   | 0.45 (0.11 - 1.89) |
| Pooled                                                       | 15 / 33,842   | 1,247 / 2,434,040 | 0.76 (0.45 - 1.27) |
| <b>Hydrocodone</b>                                           |               |                   |                    |
| MAX                                                          | 28 / 35,066   | 801 / 1,525,321   | 1.26 (0.82 - 1.94) |
| MarketScan                                                   | 5 / 5,774     | 594 / 1,148,210   | 1.18 (0.47 - 2.93) |
| Pooled                                                       | 33 / 40,840   | 1,395 / 2,673,531 | 1.24 (0.84 - 1.84) |
| <b>Oxycodone</b>                                             |               |                   |                    |
| MAX                                                          | <11* / 6,945  | 698 / 1,357,932   | 0.52 (0.16 - 1.69) |
| MarketScan                                                   | 1 / 1,440     | 451 / 872,696     | 1.27 (0.17 - 9.26) |
| Pooled                                                       | <11* / 8,385  | 1,149 / 2,230,628 | 0.66 (0.24 - 1.81) |



| <b>Codeine</b>                                   |               |                   |                    |
|--------------------------------------------------|---------------|-------------------|--------------------|
| MAX                                              | <11* / 9,431  | 800 / 1,520,158   | 0.32 (0.09 - 1.16) |
| MarketScan                                       | 1 / 1,529     | 601 / 1,155,583   | 0.84 (0.12 - 5.76) |
| Pooled                                           | <11* / 10,960 | 1,401 / 2,675,741 | 0.43 (0.15 - 1.26) |
| <b>Dose Analysis: &lt;= 300 MME</b>              |               |                   |                    |
| MAX                                              | 13 / 27,436   | 801 / 1,524,384   | 0.75 (0.43 - 1.29) |
| MarketScan                                       | 1 / 3,296     | 596 / 1,152,097   | 0.48 (0.07 - 3.30) |
| Pooled                                           | 14 / 30,732   | 1,397 / 2,676,481 | 0.73 (0.43 - 1.22) |
| <b>Dose Analysis: &gt;300 MME - &lt;=600 MME</b> |               |                   |                    |
| MAX                                              | 15 / 14,483   | 802 / 1,523,762   | 1.35 (0.77 - 2.36) |
| MarketScan                                       | 3 / 2,129     | 583 / 1,136,288   | 1.92 (0.57 - 6.52) |
| Pooled                                           | 18 / 16,612   | 1,385 / 2,660,050 | 1.43 (0.86 - 2.38) |
| <b>Dose Analysis: &gt;600 - &lt;=1200 MME</b>    |               |                   |                    |
| MAX                                              | <11* / 11,311 | 802 / 1,532,132   | 1.13 (0.58 - 2.20) |
| MarketScan                                       | 0 / 1,818     | 602 / 1,165,114   | N/A                |
| Pooled                                           | <11* / 13,129 | 1,404 / 2,697,246 | 1.13 (0.58 - 2.20) |
| <b>Dose Analysis: &gt;1200 MME</b>               |               |                   |                    |
| MAX                                              | <11* / 15,759 | 800 / 1,528,506   | 0.88 (0.43 - 1.80) |
| MarketScan                                       | 5 / 4,657     | 592 / 1,150,112   | 1.69 (0.63 - 4.53) |
| Pooled                                           | * / 20,416    | 1,392 / 2,678,618 | 1.10 (0.62 - 1.97) |

\* Cell size <11 for MAX cohort. Numbers suppressed in accord with the CMS cell size suppression policy. Abbreviations: Hd-PS, High-dimensional propensity score; MME, morphine milligram equivalent; N/A, not applicable; no., number.

eTable 8 Absolute Risk of Congenital Malformations (Secondary Outcomes) Among Infants Born to Mothers With and Without Exposure to Opioids.

|                                                         | MAX 2000-2014                  |                           |                                    | MarketScan 2003-2015           |                           |                                    |
|---------------------------------------------------------|--------------------------------|---------------------------|------------------------------------|--------------------------------|---------------------------|------------------------------------|
|                                                         | Events                         | Total                     | Risk                               | Events                         | Total                     | Risk                               |
|                                                         | <i>no. of affected infants</i> | <i>no. of pregnancies</i> | <i>no./1,000 infants (95 % CI)</i> | <i>no. of affected infants</i> | <i>no. of pregnancies</i> | <i>no./1,000 infants (95 % CI)</i> |
| <b>Conotruncal Defect</b>                               |                                |                           |                                    |                                |                           |                                    |
| Exposed                                                 | 61                             | 70,447                    | 0.87 (0.65 - 1.08)                 | 13                             | 12,454                    | 1.04 (0.48 - 1.61)                 |
| Unexposed                                               | 1,158                          | 1,532,133                 | 0.76 (0.71 - 0.80)                 | 1,064                          | 1,165,222                 | 0.91 (0.86 - 0.97)                 |
| <b>Single Ventricle Defect</b>                          |                                |                           |                                    |                                |                           |                                    |
| Exposed                                                 | 11                             | 70,447                    | 0.16 (0.06 - 0.25)                 | 1                              | 12,454                    | 0.08 (-0.08 - 0.24)                |
| Unexposed                                               | 237                            | 1,532,133                 | 0.15 (0.13 - 0.17)                 | 172                            | 1,165,222                 | 0.15 (0.13 - 0.17)                 |
| <b>Atrioventricular Septal Defect</b>                   |                                |                           |                                    |                                |                           |                                    |
| Exposed                                                 | 16                             | 70,447                    | 0.23 (0.12 - 0.34)                 | -                              | 12,454                    | -                                  |
| Unexposed                                               | 356                            | 1,532,133                 | 0.23 (0.21 - 0.26)                 | 245                            | 1,165,222                 | 0.21 (0.18 - 0.24)                 |
| <b>Right-Sided Defect</b>                               |                                |                           |                                    |                                |                           |                                    |
| Exposed                                                 | 77                             | 70,447                    | 1.09 (0.85 - 1.34)                 | 16                             | 12,454                    | 1.28 (0.66 - 1.91)                 |
| Unexposed                                               | 1,473                          | 1,532,133                 | 0.96 (0.91 - 1.01)                 | 1,211                          | 1,165,222                 | 1.04 (0.98 - 1.10)                 |
| <b>Left-Sided Defect</b>                                |                                |                           |                                    |                                |                           |                                    |
| Exposed                                                 | 88                             | 70,447                    | 1.25 (0.99 - 1.51)                 | 17                             | 12,454                    | 1.37 (0.72 - 2.01)                 |
| Unexposed                                               | 1,473                          | 1,532,133                 | 0.96 (0.91 - 1.01)                 | 1,294                          | 1,165,222                 | 1.11 (1.05 - 1.17)                 |
| <b>Persistent Ductus Arteriosus</b>                     |                                |                           |                                    |                                |                           |                                    |
| Exposed                                                 | 68                             | 70,447                    | 0.97 (0.74 - 1.19)                 | 16                             | 12,454                    | 1.28 (0.66 - 1.91)                 |
| Unexposed                                               | 1,416                          | 1,532,133                 | 0.92 (0.88 - 0.97)                 | 1,251                          | 1,165,222                 | 1.07 (1.01 - 1.13)                 |
| <b>Persistent Pulmonary Hypertension of the Newborn</b> |                                |                           |                                    |                                |                           |                                    |
| Exposed                                                 | 93                             | 70,447                    | 1.32 (1.05 - 1.59)                 | 13                             | 12,454                    | 1.04 (0.48 - 1.61)                 |
| Unexposed                                               | 1,197                          | 1,532,133                 | 0.78 (0.74 - 0.83)                 | 521                            | 1,165,222                 | 0.45 (0.41 - 0.49)                 |
| <b>Anomalous Pulmonary Venous Return</b>                |                                |                           |                                    |                                |                           |                                    |
| Exposed                                                 | 17                             | 70,447                    | 0.24 (0.13 - 0.36)                 | 2                              | 12,454                    | 0.16 (-0.06 - 0.38)                |
| Unexposed                                               | 287                            | 1,532,133                 | 0.19 (0.17 - 0.21)                 | 187                            | 1,165,222                 | 0.16 (0.14 - 0.18)                 |
| <b>Other Cardiac Defect</b>                             |                                |                           |                                    |                                |                           |                                    |
| Exposed                                                 | 102                            | 70,447                    | 1.45 (1.17 - 1.73)                 | 16                             | 12,454                    | 1.28 (0.66 - 1.91)                 |
| Unexposed                                               | 1,844                          | 1,532,133                 | 1.20 (1.15 - 1.26)                 | 1,059                          | 1,165,222                 | 0.91 (0.85 - 0.96)                 |

|                                                | MAX 2000-2014                  |                           |                                    | MarketScan 2003-2015           |                           |                                    |
|------------------------------------------------|--------------------------------|---------------------------|------------------------------------|--------------------------------|---------------------------|------------------------------------|
|                                                | Events                         | Total                     | Risk                               | Events                         | Total                     | Risk                               |
|                                                | <i>no. of affected infants</i> | <i>no. of pregnancies</i> | <i>no./1,000 infants (95 % CI)</i> | <i>no. of affected infants</i> | <i>no. of pregnancies</i> | <i>no./1,000 infants (95 % CI)</i> |
| <b>Cardiac Defect NOS</b>                      |                                |                           |                                    |                                |                           |                                    |
| Exposed                                        | 137                            | 70,447                    | 1.94 (1.62 - 2.27)                 | 20                             | 12,454                    | 1.61 (0.90 - 2.31)                 |
| Unexposed                                      | 2,148                          | 1,532,133                 | 1.40 (1.34 - 1.46)                 | 1,445                          | 1,165,222                 | 1.24 (1.18 - 1.30)                 |
| <b>Gastroschisis</b>                           |                                |                           |                                    |                                |                           |                                    |
| Exposed                                        | 34                             | 70,447                    | 0.48 (0.32 - 0.64)                 | 1                              | 12,454                    | 0.08 (-0.08 - 0.24)                |
| Unexposed                                      | 663                            | 1,532,133                 | 0.43 (0.40 - 0.47)                 | 122                            | 1,165,222                 | 0.10 (0.09 - 0.12)                 |
| <b>Any Central Nervous System Malformation</b> |                                |                           |                                    |                                |                           |                                    |
| Exposed                                        | 167                            | 70,447                    | 2.37 (2.01 - 2.73)                 | 22                             | 12,454                    | 1.77 (1.03 - 2.50)                 |
| Unexposed                                      | 2,880                          | 1,532,133                 | 1.88 (1.81 - 1.95)                 | 1,465                          | 1,165,222                 | 1.26 (1.19 - 1.32)                 |
| <b>Microcephaly</b>                            |                                |                           |                                    |                                |                           |                                    |
| Exposed                                        | 34                             | 70,447                    | 0.48 (0.32 - 0.64)                 | 3                              | 12,454                    | 0.24 (-0.03 - 0.51)                |
| Unexposed                                      | 580                            | 1,532,133                 | 0.38 (0.35 - 0.41)                 | 208                            | 1,165,222                 | 0.18 (0.15 - 0.20)                 |
| <b>Hydrocephaly</b>                            |                                |                           |                                    |                                |                           |                                    |
| Exposed                                        | 72                             | 70,447                    | 1.02 (0.79 - 1.26)                 | 10                             | 12,454                    | 0.80 (0.31 - 1.30)                 |
| Unexposed                                      | 1,064                          | 1,532,133                 | 0.69 (0.65 - 0.74)                 | 466                            | 1,165,222                 | 0.40 (0.36 - 0.44)                 |
| <b>Reduction Deformity of Brain</b>            |                                |                           |                                    |                                |                           |                                    |
| Exposed                                        | 11                             | 70,447                    | 0.16 (0.06 - 0.25)                 | 2                              | 12,454                    | 0.16 (-0.06 - 0.38)                |
| Unexposed                                      | 299                            | 1,532,133                 | 0.20 (0.17 - 0.22)                 | 185                            | 1,165,222                 | 0.16 (0.14 - 0.18)                 |
| <b>Cleft Palate</b>                            |                                |                           |                                    |                                |                           |                                    |
| Exposed                                        | 64                             | 70,447                    | 0.91 (0.69 - 1.13)                 | 21                             | 12,454                    | 1.69 (0.97 - 2.41)                 |
| Unexposed                                      | 827                            | 1,532,133                 | 0.54 (0.50 - 0.58)                 | 732                            | 1,165,222                 | 0.63 (0.58 - 0.67)                 |
| <b>Cleft Lip</b>                               |                                |                           |                                    |                                |                           |                                    |
| Exposed                                        | 33                             | 70,447                    | 0.47 (0.31 - 0.63)                 | 6                              | 12,454                    | 0.48 (0.10 - 0.87)                 |
| Unexposed                                      | 530                            | 1,532,133                 | 0.35 (0.32 - 0.38)                 | 472                            | 1,165,222                 | 0.41 (0.37 - 0.44)                 |
| <b>Cleft Palate with Cleft Lip</b>             |                                |                           |                                    |                                |                           |                                    |
| Exposed                                        | 48                             | 70,447                    | 0.68 (0.49 - 0.87)                 | 10                             | 12,454                    | 0.80 (0.31 - 1.30)                 |
| Unexposed                                      | 802                            | 1,532,133                 | 0.52 (0.49 - 0.56)                 | 602                            | 1,165,222                 | 0.52 (0.48 - 0.56)                 |

Abbreviations: CI, confidence interval; no., number; NOS, not otherwise specified.

eFigure 1 Cohort Selection for Pregnancies in the Medicaid Analytic Extract 2000-2014.

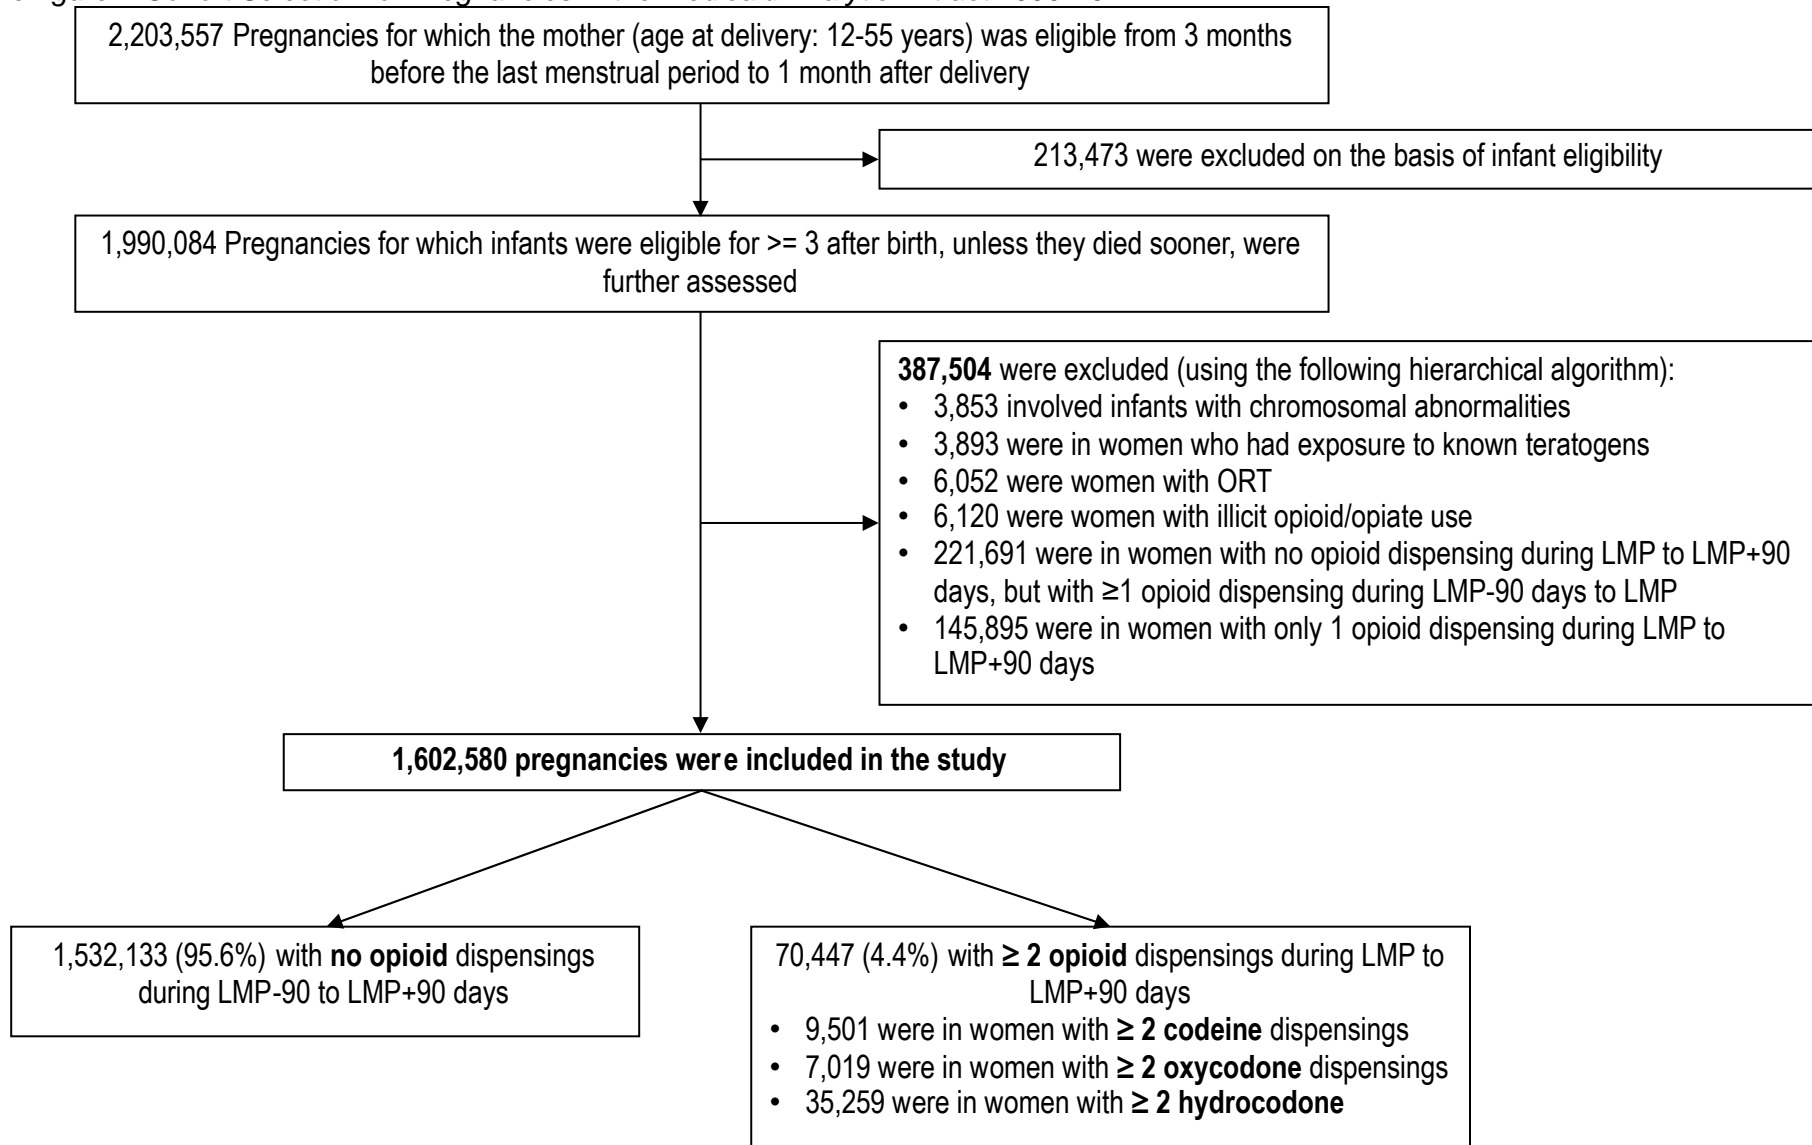

Abbreviations: LMP, last menstrual period; ORT, opioid replacement therapy.

eFigure 2 Cohort Selection for Pregnancies in the IBM Health MarketScan Research Database 2003-2015.

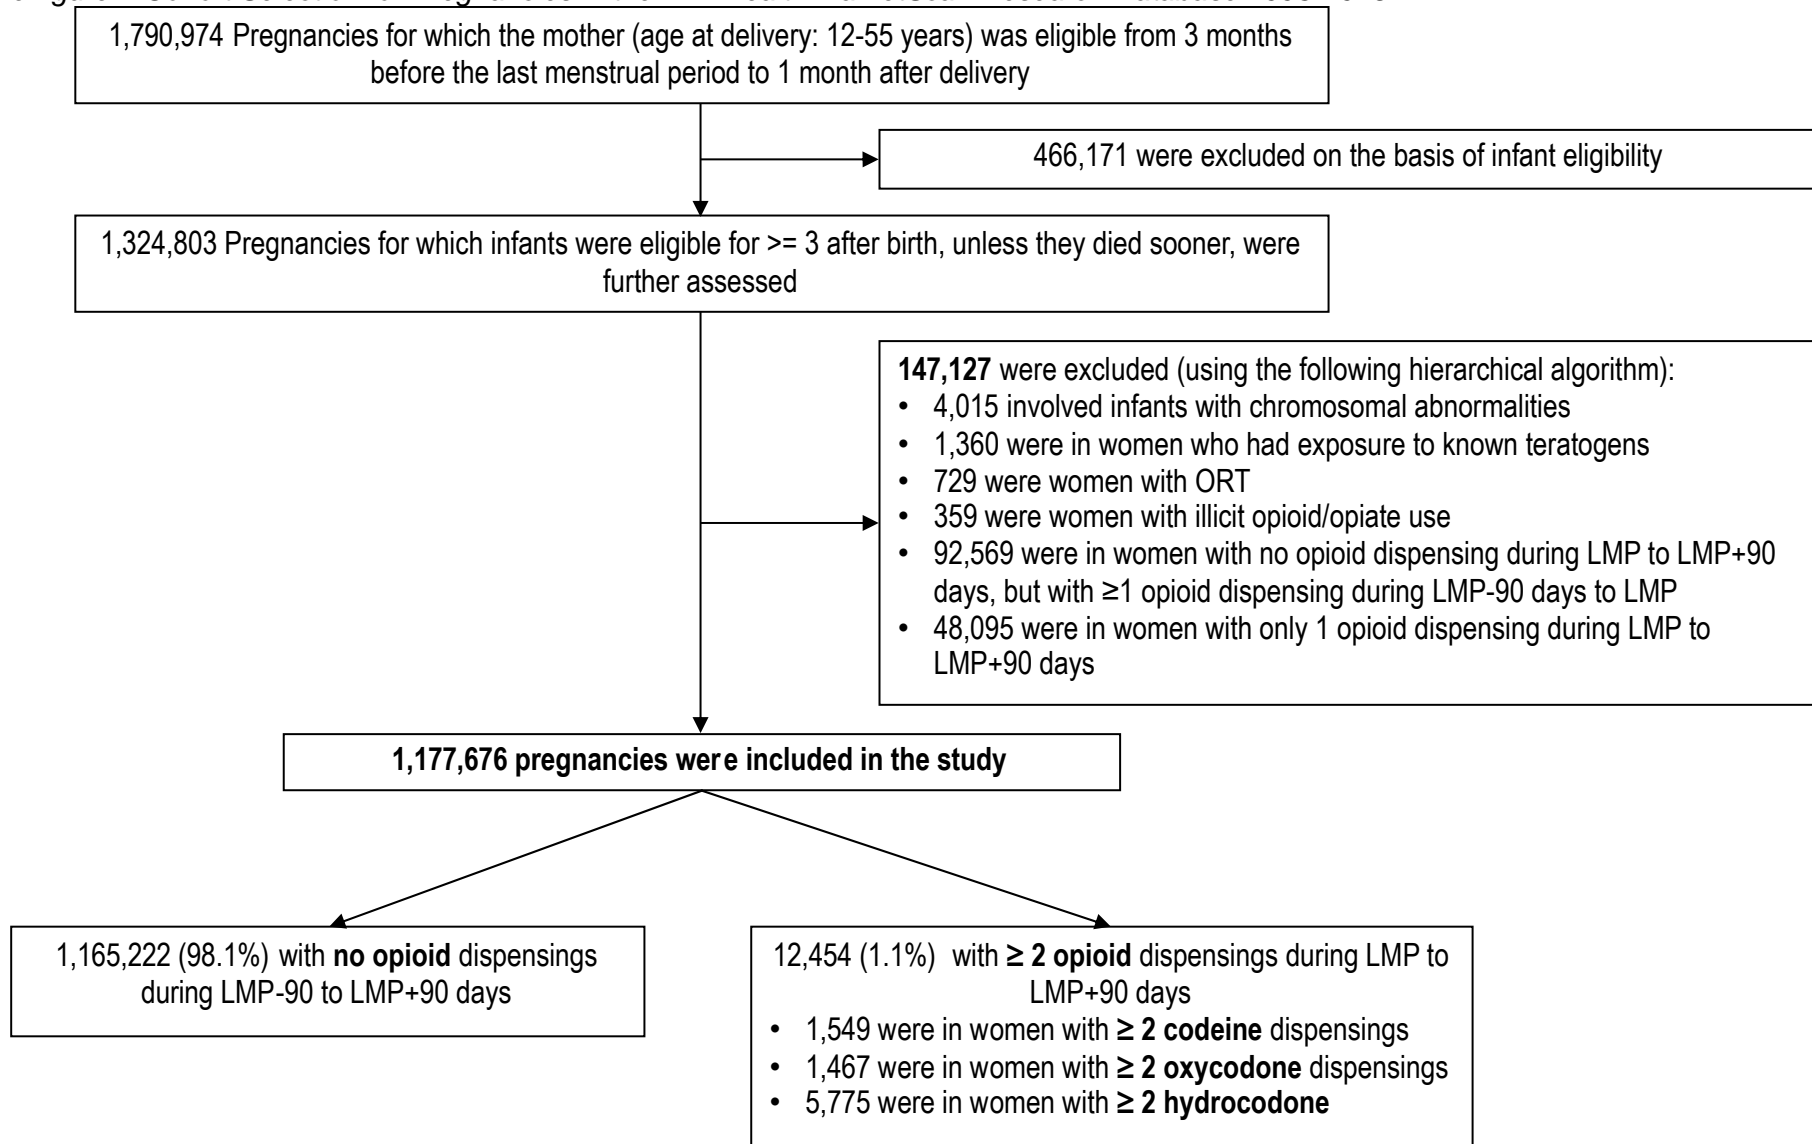

Abbreviations: LMP, last menstrual period; ORT, opioid replacement therapy.

eFigure 3 Opioid Dispensing Patterns Among Pregnancies With  $\geq 2$  Opioid Prescriptions During the First Trimester.

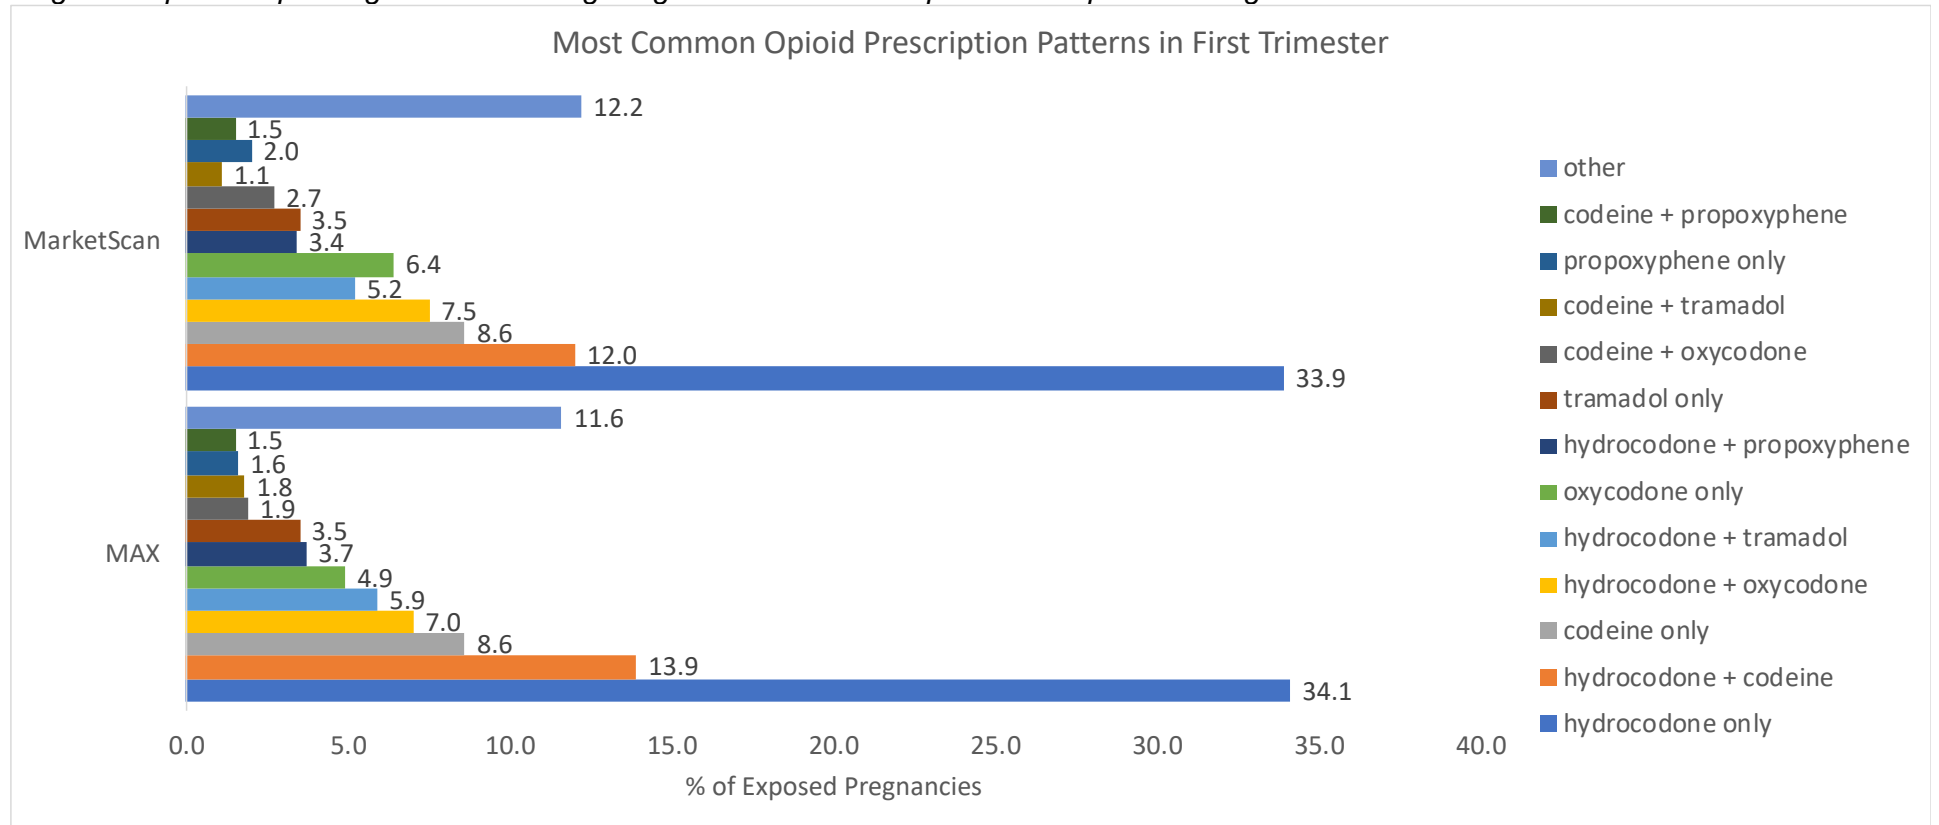

eFigure 4 Risk of Congenital Malformations (Oral Cleft Subgroups) in Infants Following Exposure to Opioids During the First Trimester: Main Analyses (Unadjusted and Propensity Score Stratified).

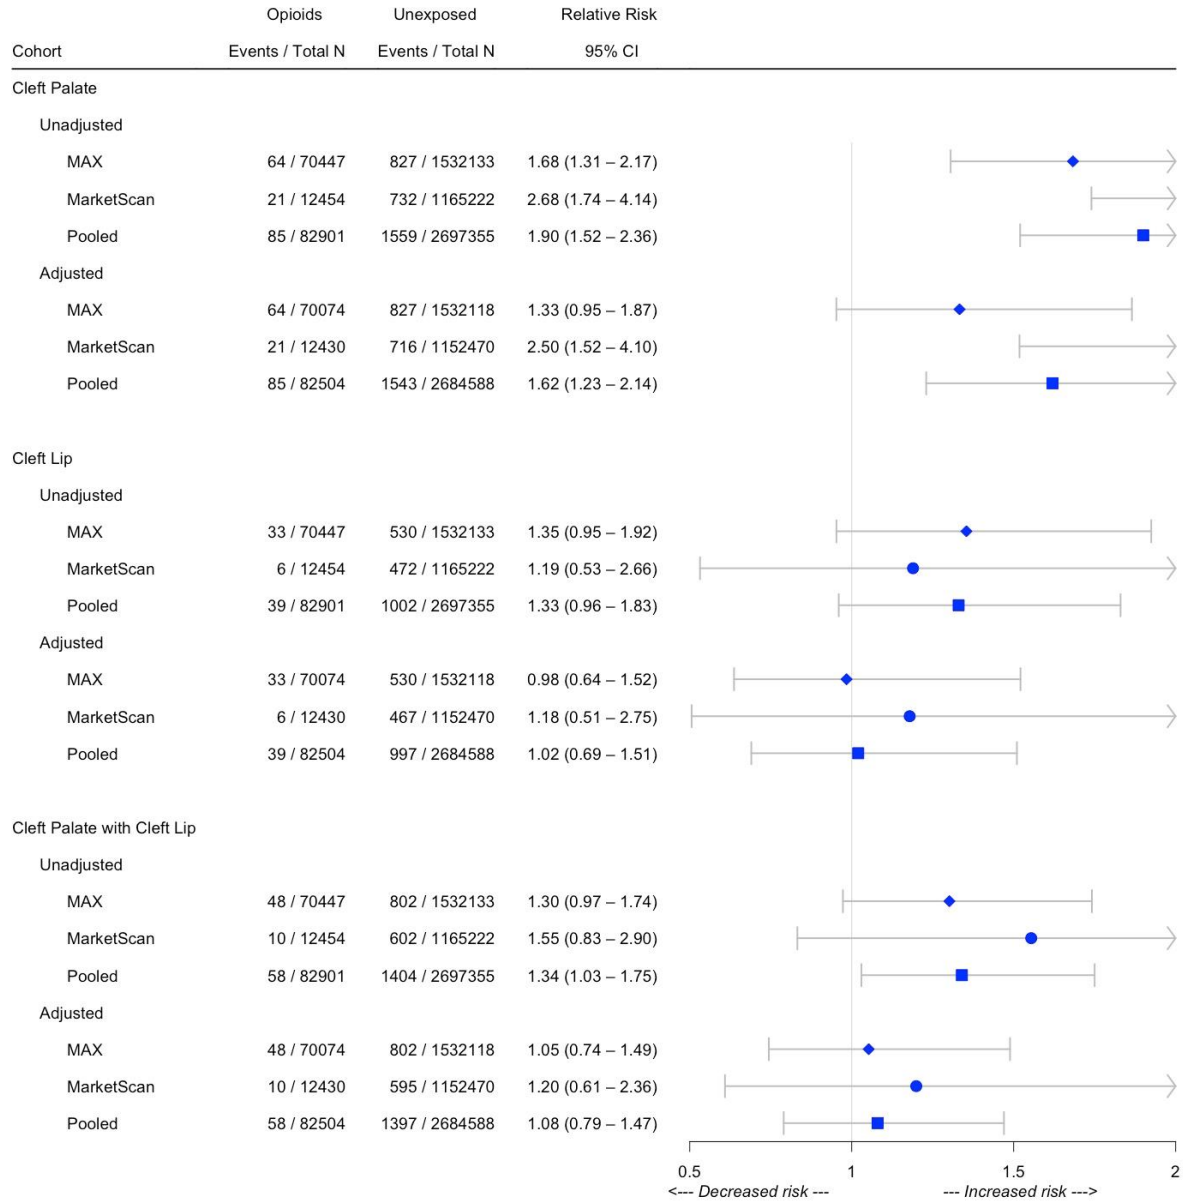

eFigure 5 Risk of Congenital Malformations (Oral Cleft Subgroups) in Infants Following Exposure to Opioids During the First Trimester: Sensitivity Analyses (Pooled Estimates, Propensity Score Stratified).

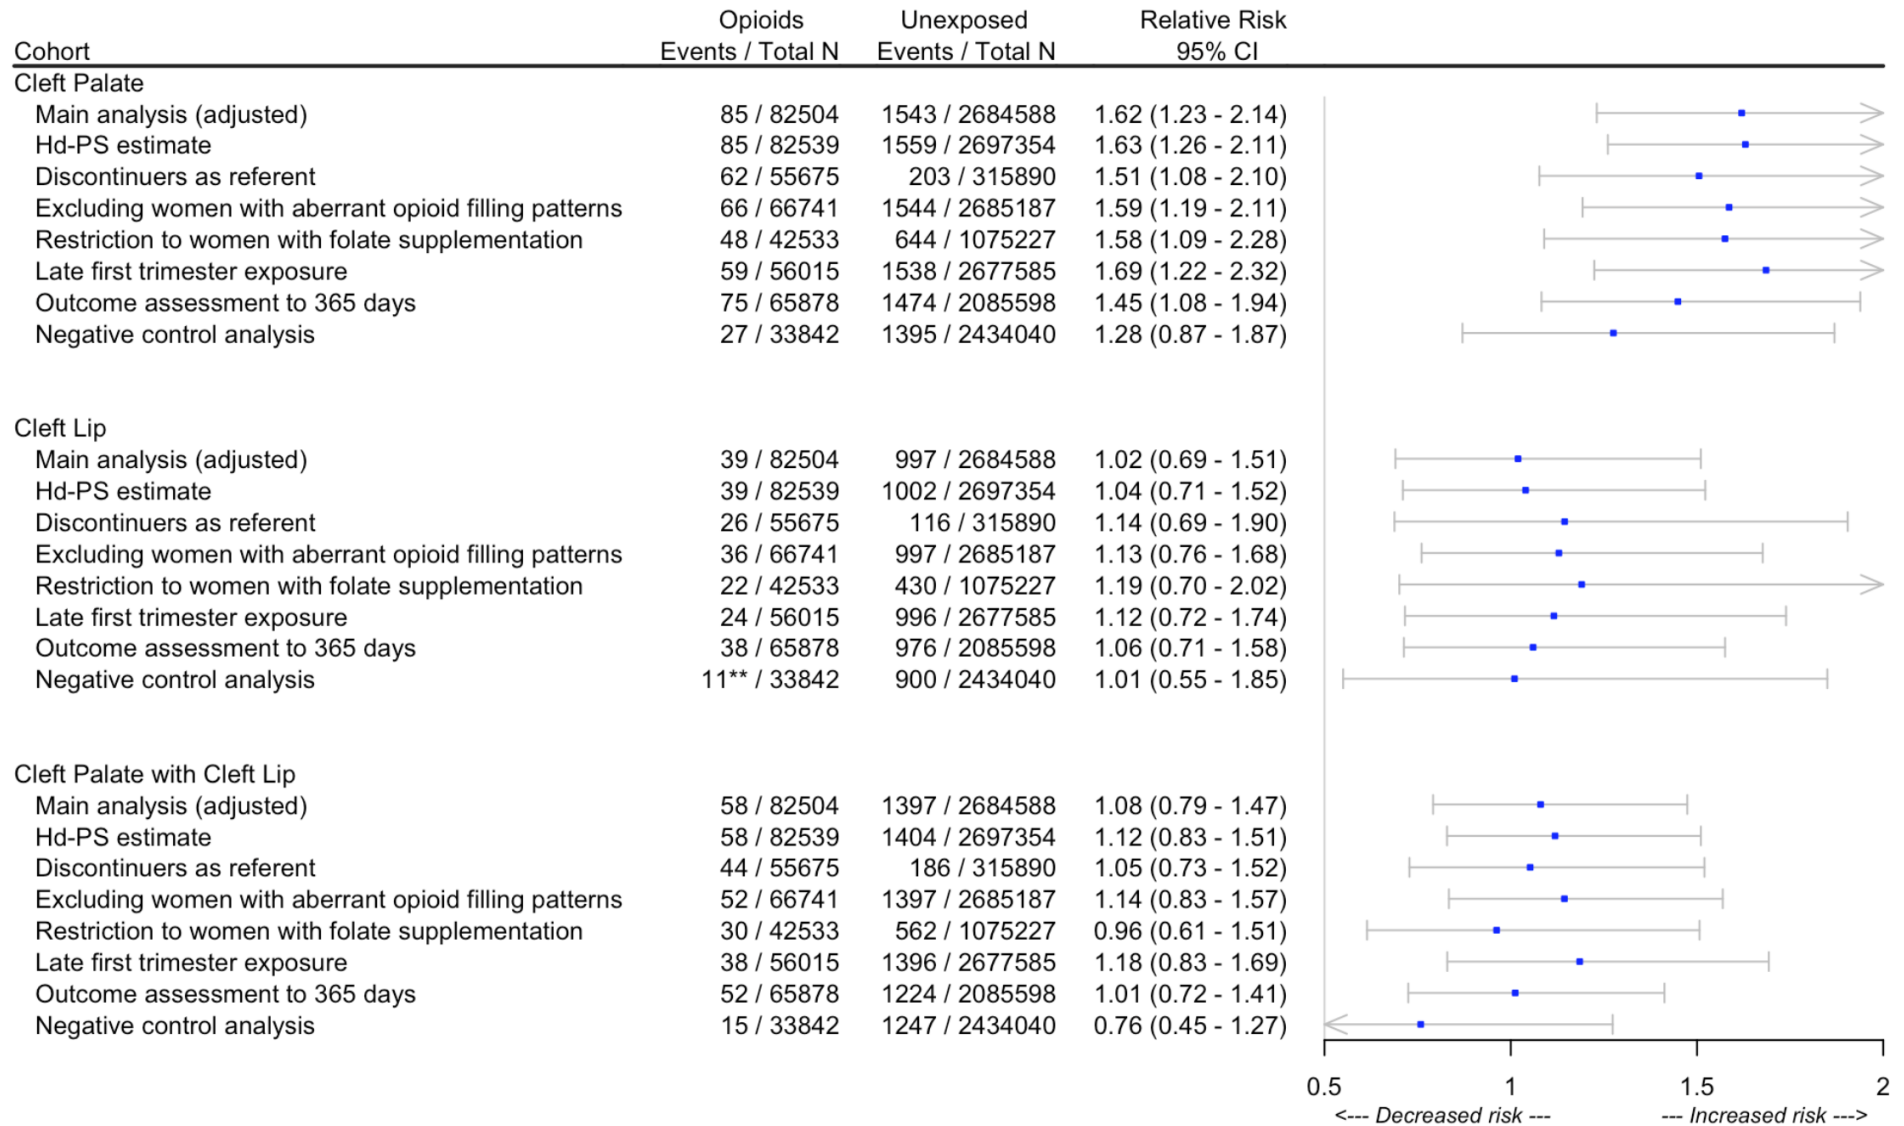

\*\* Results presented here are not pooled but represent results in the MAX cohort as there were no outcomes among exposed in the MarketScan cohort.

Aberrant opioid filling patterns were defined based on an average of >120 milligrams oral morphine equivalents (MME) for ≥90 consecutive days or use of >3 pharmacies or >3 prescribers for opioid prescriptions between 3 months prior to pregnancy and the end of the first trimester.

Abbreviations: HdPS, High-dimensional Propensity Score.



eFigure 6 Risk of Congenital Malformations (Oral Cleft Subgroups) in Infants Following Exposure to Opioids During the First Trimester: Subgroup Analyses (Pooled Estimates, Propensity Score Stratified).

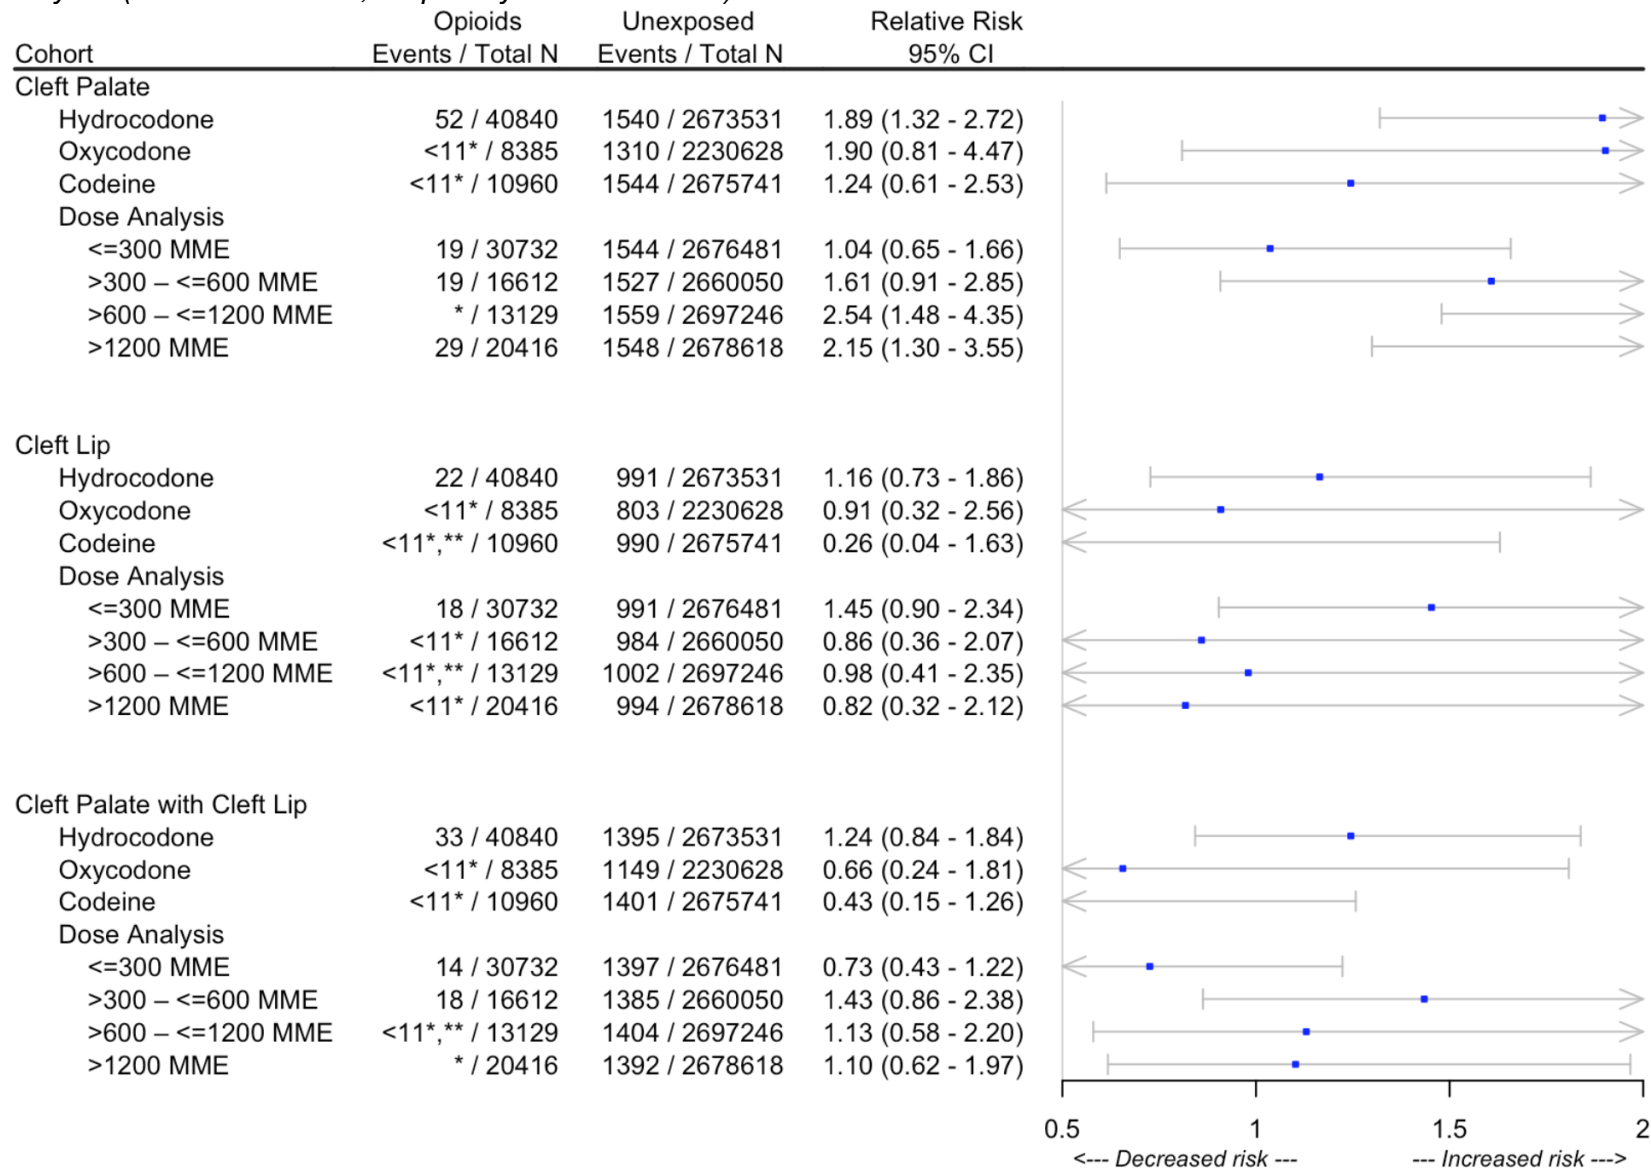

\* Cell size <11 in MAX cohort. Numbers are suppressed in accord with the CMS cell size suppression policy.

\*\* Results presented here are not pooled but represent results in the MAX cohort as there were no outcomes among exposed in the MarketScan cohort.

Abbreviation: MME, morphine milligram equivalent.

eFigure 7 Risk of Congenital Malformations (Secondary Outcomes – Cardiac Malformations) in Infants Following Exposure to Opioids During the First Trimester: Main Analyses (Unadjusted and Propensity Score Stratified).

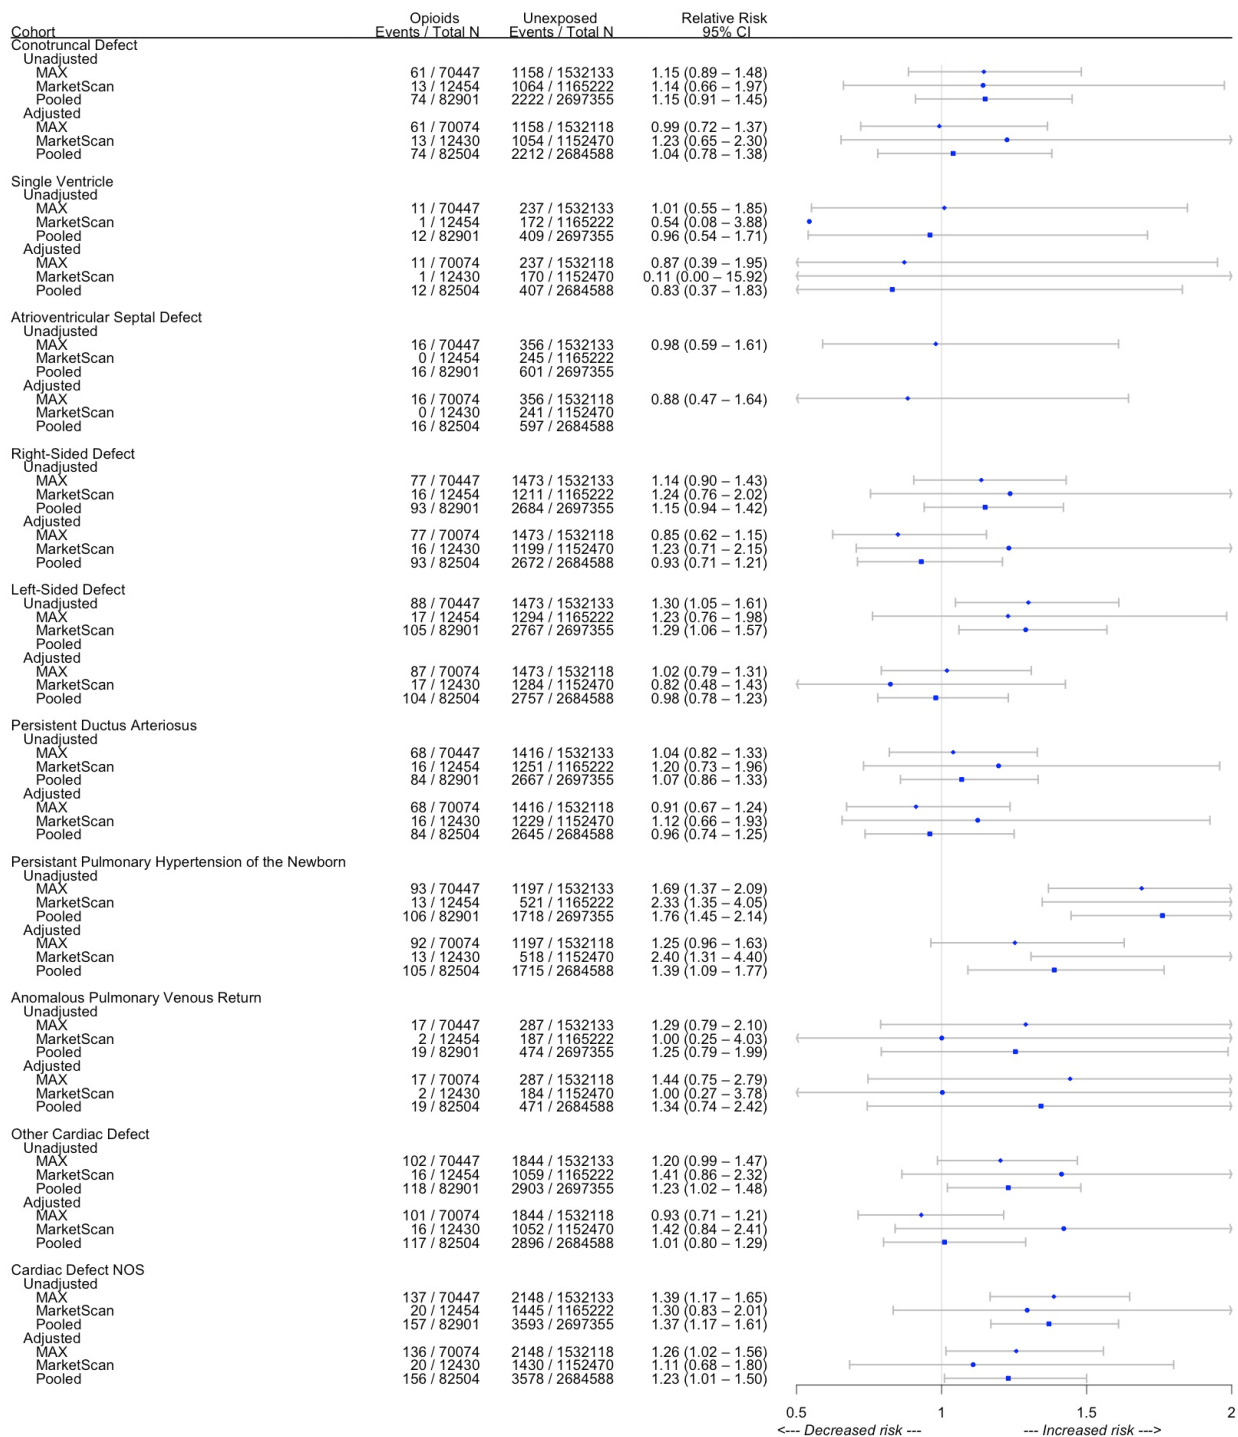

Abbreviations: NOS, not otherwise specified.

eFigure 8 Risk of Congenital Malformations (Secondary Outcomes – Non-Cardiac Malformations) in Infants Following Exposure to Opioids During the First Trimester: Main Analyses (Unadjusted and Propensity Score Stratified).

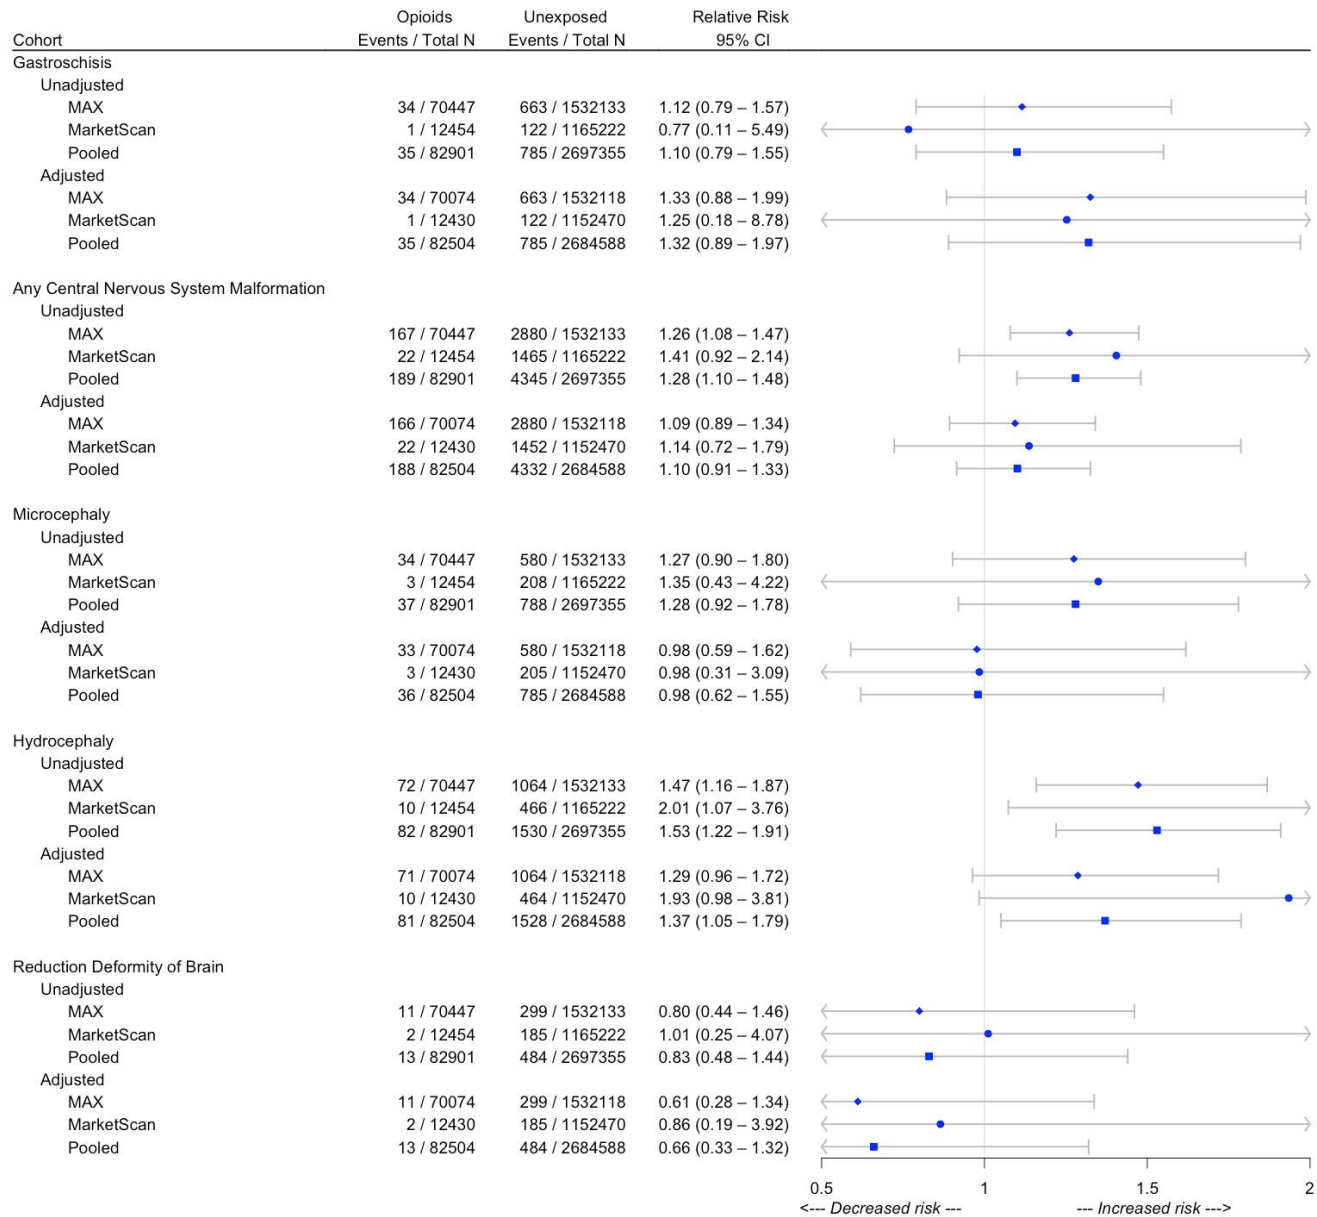

## Appendix 1 Cohort Selection

Cohorts were restricted to women aged 12 to 55 years. To ensure accurate capture of relevant diagnoses, procedures, and medication exposures, we required women in the cohorts to have insurance coverage from at least 3 months prior to the date of the estimated last menstrual period (LMP) to at least 1 month after delivery. We also required that infants had insurance coverage for at least the first 3 months after birth (unless they died sooner in which case a shorter period of coverage was allowed). For Medicaid beneficiaries, we restricted our analysis to women and infants without restricted benefits, private insurance, or certain capitated managed care programs that underreport claims to the Medicaid Analytic eXtract.<sup>(1)</sup> We excluded pregnancies in which mothers were exposed to known teratogens during the first trimester and pregnancies with an infant with a chromosomal abnormality. Finally, we excluded pregnancies of women with diagnoses indicating an opioid use disorder or who were treated with opioid replacement therapy (as shown in Supplementary Figures 1-2) given that the focus of the present study is on the risks associated with prescription opioid analgesics.

## Appendix 2 Validation Study Description and Results

As part of this study, we validated claims-based algorithms for identifying the primary outcomes of interest - Ventricular Septal Defects (VSD), Secundum Atrial Septal Defects/Patent Foramen Ovale (ASD/PFO), Neural Tube Defects (NTD), Club Foot, and Oral Clefts - using hospital medical records.

Using the Mass General Brigham (MGB) Research Patient Data Registry – a centralized clinical data warehouse of patients receiving care at MGB affiliated hospitals in the Boston area – we identified infants born between 2008 and 2014 who had a malformation of interest based on algorithms using ICD-9 and CPT diagnostic and procedural codes in the infant claims (as described in Supplementary Table 1). To avoid inclusion of rule-out diagnosis or coding errors, a malformation was considered present if a diagnosis was recorded on  $\geq 2$  different dates, or if only recorded on 1 date, associated with a specific therapeutic procedure or surgery code or infant death shortly after birth. Since we cannot distinguish ASD from prematurity-related PFO based on ICD-9 codes, we excluded ASD/PFO diagnoses in preterm infants and required diagnostic codes to persist for  $\geq 6$  weeks. Medical charts of algorithm-identified cases were independently reviewed by two physicians to assess the presence of the outcome. Reviewer pairs were asked to reevaluate cases together and attempt to achieve consensus whenever there was disagreement. Positive predictive values (PPVs) and 95% confidence intervals (CIs) were calculated, using medical charts as the gold standard.

50 randomly sampled cases were considered for each outcome, except for NTD for which all 24 cases identified in the database were reviewed. Medical charts were missing for 1 case of VSD, 1 case of NTD and 1 case of Oral Cleft. All 49 retrievable VSDs were classified as true positives (PPV=100%; 95% CI=91%, 100%). All 50 ASD/PFO cases were either true ASDs (N=18) or PFOs (N=32), resulting in a PPV of 100% (91%, 100%). PPVs were 74% (51%, 89%) for NTD, 98% (88%, 100%) for Club Foot and 96% (85%, 99%) for Oral Cleft, see Appendix Table 1.

*Appendix Table 1 Positive Predicted Values of Validated Malformations.*

| Malformation                                       | # True Positives | # False Positives | Total | Charts N/A | PPV (95% CI)       |
|----------------------------------------------------|------------------|-------------------|-------|------------|--------------------|
| Ventricular Septal Defect                          | 49               | 0                 | 49    | 1          | 1.00 (0.91 - 1.00) |
| Neural Tube Defect                                 | 17               | 6                 | 23    | 1          | 0.74 (0.51 - 0.89) |
| Club Foot                                          | 49               | 1                 | 50    | 0          | 0.98 (0.88 - 1.00) |
| Secundum Atrial Septal Defect/Patent Foramen Ovale | 18 ASD/32 PFO    | 0                 | 50    | 0          | 1.00 (0.91 - 1.00) |
| Oral Cleft                                         | 47               | 2                 | 49    | 1          | 0.96 (0.85 - 0.99) |

Abbreviations: ASD, secundum atrial septal defect; CI, confidence interval; N/A, not available; PFO, patent foramen ovale; PPV, positive predictive value.

### Appendix 3 Quantifying the Potential Effect of Restriction to Live Births

The study cohorts consisted of live births and did not include pregnancies ending in stillbirth, spontaneous abortion or therapeutic abortion.

If the frequency of live births is the same among opioid-exposed and unexposed pregnancies, within levels of covariates included as potential confounders, then the relative risk (RR) estimates as they were obtained from our analyses are unbiased.

If, however, non-live births occur with a higher frequency among opioid-exposed vs. unexposed pregnancies, then estimates from our main analyses may be biased towards the null. To assess this potential bias, we quantified the potential impact of missing non-live births (including stillbirth, spontaneous abortion and therapeutic abortion) using methods that have previously been described in detail and have been employed by our team in prior evaluations of teratogenic potential of select medications(2-6). The approach used estimates the true (corrected) RR at the time of the occurrence of the defect as a function of the observed association and the probabilities of survival until birth as follows:

Corrected RR = observed RR \* (S10\*S01/S11\*S00), with

S10 being the probability of livebirth among unexposed infants with the malformation of interest;

S11 being the probability of livebirth among exposed infants with the malformation of interest;

S00 being the probability of livebirth among unexposed infants without the malformation of interest;

S01 being the probability of livebirth among exposed infants without the malformation of interest.

Bias does not occur unless both the malformation of interest and the exposure affect the probability of livebirth. The selection probabilities would otherwise cancel out.

In the approach used we assumed a frequency of non-live births in non-malformed fetuses of 20%, corresponding to a livebirth probability of 80%. Using literature-based estimates of the frequency of termination for recognized malformations, we modeled a range of livebirth probabilities in the unexposed malformed, from 55% to 80% for all malformations of interest (lower probabilities are considered unrealistic)(7). We then assessed the potential impact of a 10% to 20% lower frequency of livebirths among the opioid exposed (within levels of covariates adjusted for through the use of propensity scores) on the fully adjusted RR (see Appendix Table 2).

Appendix Figures 1 through 6 show the range of plausible values for the corrected RR. Even under the most extreme assumption of at least 45% non-live births among unexposed infants with the malformation of interest and 65% non-live births among opioid-exposed infants, the RR would remain below 1.30 for all malformations of interest.

Of note, this analysis was not conducted for oral clefts as non-syndromic oral clefts do not result in fetal death and are rarely a reason for terminations.(7, 8)

*Appendix Table 2 Probability of Live Birth*

| Pregnancies with malformation |               | Pregnancies without malformation |               |
|-------------------------------|---------------|----------------------------------|---------------|
| Unexposed (S10)               | Exposed (S11) | Unexposed (S00)                  | Exposed (S01) |
| 55-80%                        | S10-20%       | 80%                              | S00-20%       |
|                               | S10-10%       |                                  | S00-10%       |
|                               | S10           |                                  | S00           |

**Appendix Figures 1-6 Corrected Relative Risk for the Association Between Opioid Exposure During the First Trimester and Congenital Malformations, Starting from the Observed Adjusted Relative Risk.**

**1 Any Congenital Malformation**

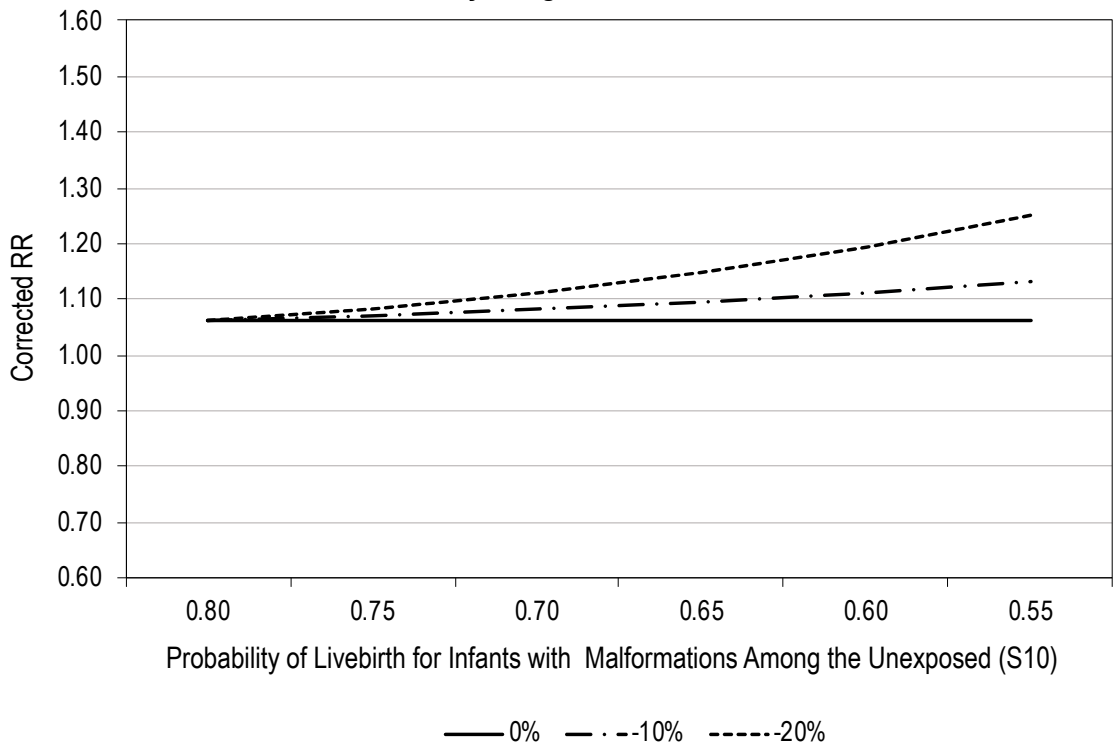

**Fig 2 Any Cardiovascular Malformation**

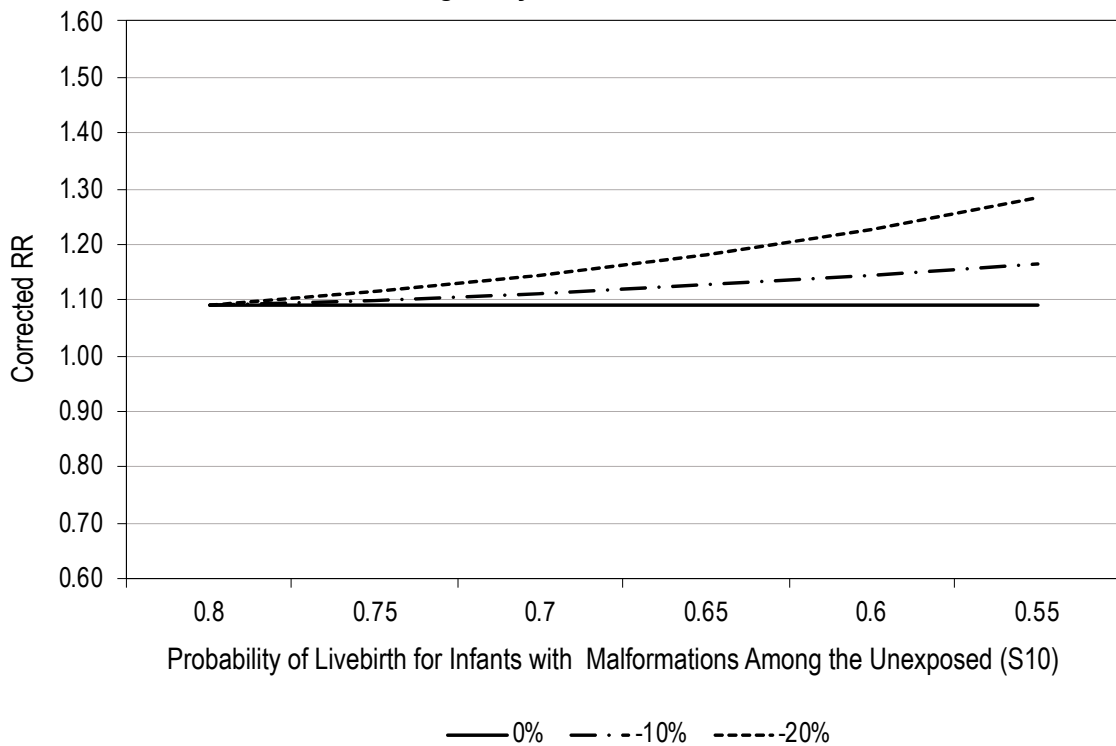

**Fig 3 Ventricular Septal Defect**

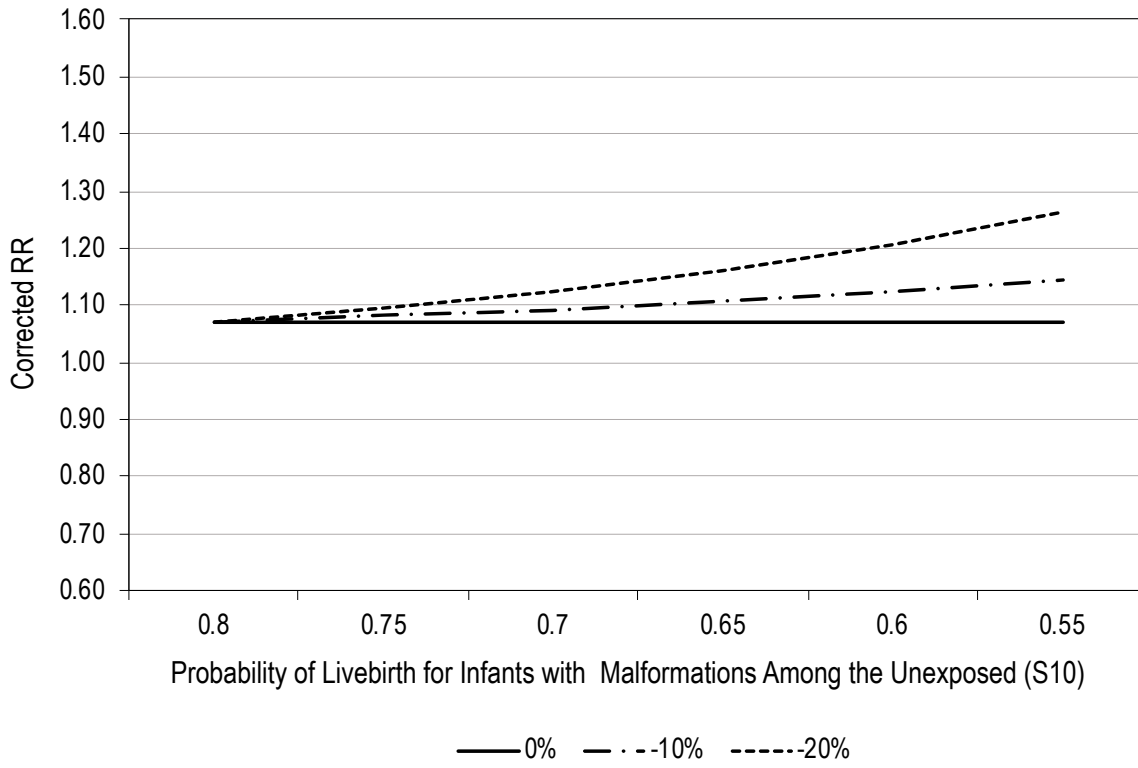

**Fig 4 Secundum Atrial Septal Defect/Patent Foramen Ovale**

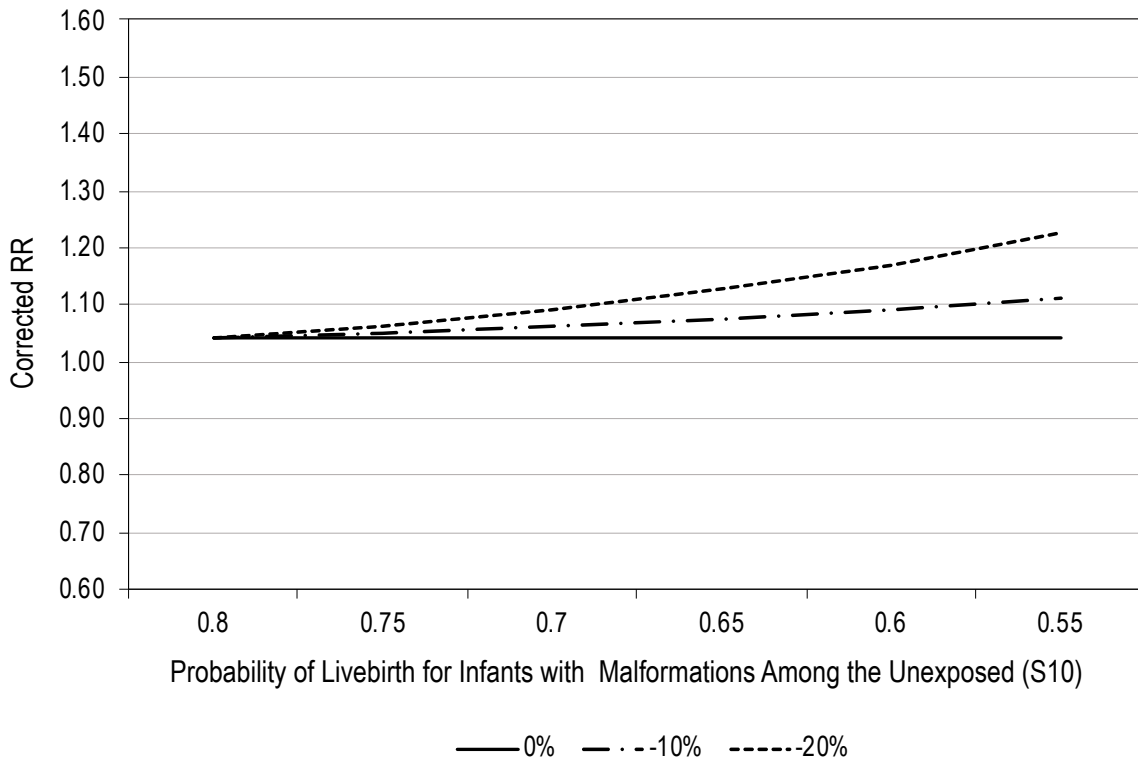



**Fig 5 Neural Tube Defect**

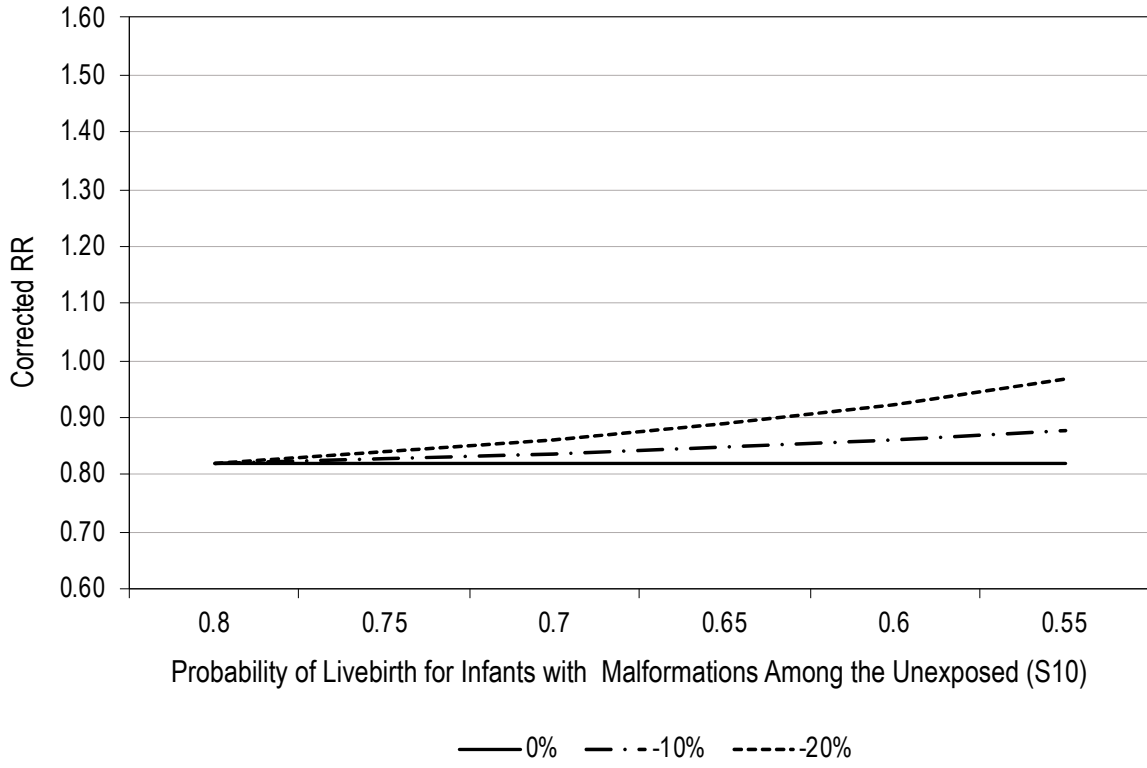

**Fig 6 Club Foot**

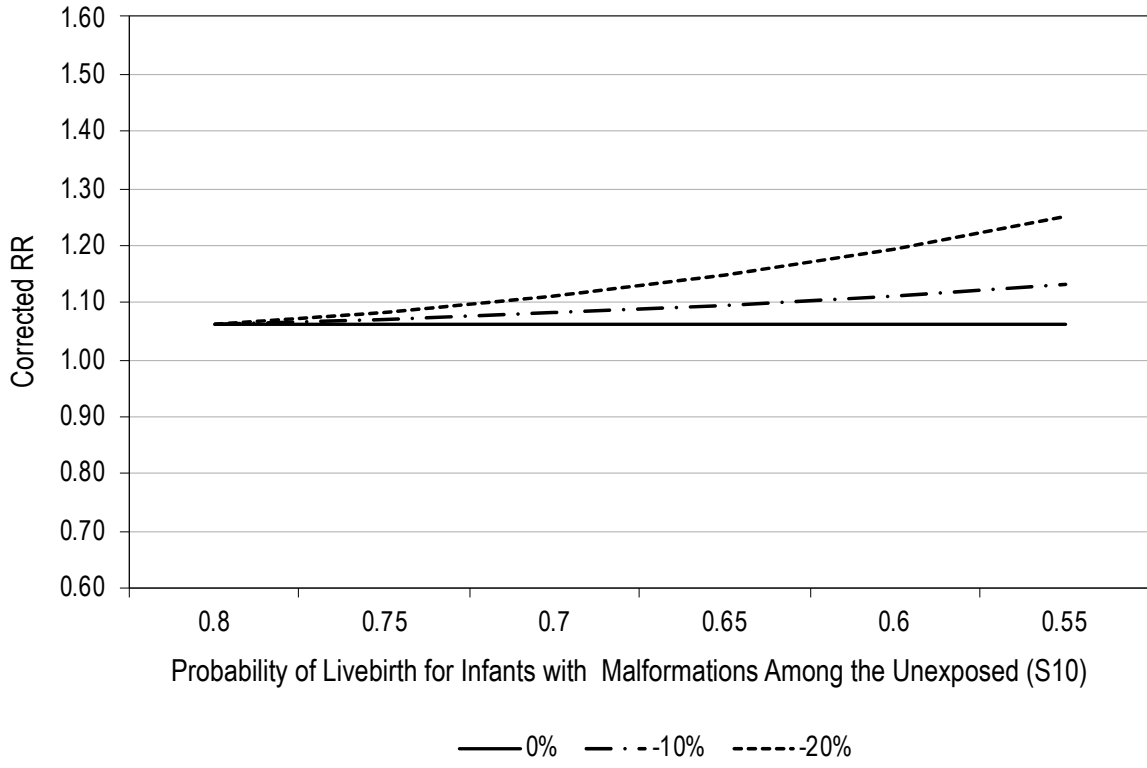

#### **Appendix 4 Sensitivity Analysis of Residual Confounding to Explain Increase in Oral Clefts**

With an observed prevalence of 12.8% among exposed and 2.2% among unexposed Medicaid insured women, and 4.95% among exposed and 0.48% among unexposed commercially insured women, tobacco use is likely to be incompletely captured in claims data. The Centers for Disease Control and Prevention estimate that 7.2% of women smoke cigarettes during pregnancy, with strong variations by race/ethnicity, maternal age and social economic status.(9)

To quantify the potential impact of residual confounding (e.g., by incompletely measured tobacco use or other factors), an approach that has been referred to as the target-adjustment sensitivity analysis(10, 11) will be used. This approach assesses the extent of confounding necessary to fully explain the observed findings if in truth there is no association, i.e. under the null.

Appendix Figures 7 and 8 display the strengths of the association between opioid exposure during the first trimester and a potential unmeasured/incompletely captured confounder (e.g., tobacco use) (displayed as odds ratio (OREC)) and the association between the potential confounder and the outcomes of interest (oral cleft overall & cleft palate) (displayed as relative risk (RRCD)) that would be required to fully explain the observed increased risk of the outcome associated with opioid exposure (pooled adjusted RR=1.21 for oral cleft & 1.62 for cleft palate) if in truth no such increase existed ("True" RR=1).

For an unmeasured confounder present in 10% or 20% of the population, relative risks of 2.5 or more linking the hypothetical confounder to both opioid exposure and oral cleft (and approximately 4 for cleft palate) would be needed to fully explain the observed association. For a confounder present in 1.8% of the population (which would correspond to the observed prevalence of tobacco use among exposed and unexposed women in both cohorts together), relative risks of at least 5 for oral clefts and greater than 8 for cleft palates would be needed. These required associations are unrealistically high, especially since previous literature suggested only a modest association between smoking and oral cleft (OR=1.22).(12)

Appendix Figures 8-9 Sensitivity analysis of residual confounding by and unmeasured or incompletely measured confounder such as tobacco use (rule-out approach) for the estimated pooled adjusted relative risk of 1.21 for oral cleft and 1.77 for cleft palate and different levels of confounder prevalence (PC=1.8%, 10%, 20%).

Fig 7 Oral Cleft

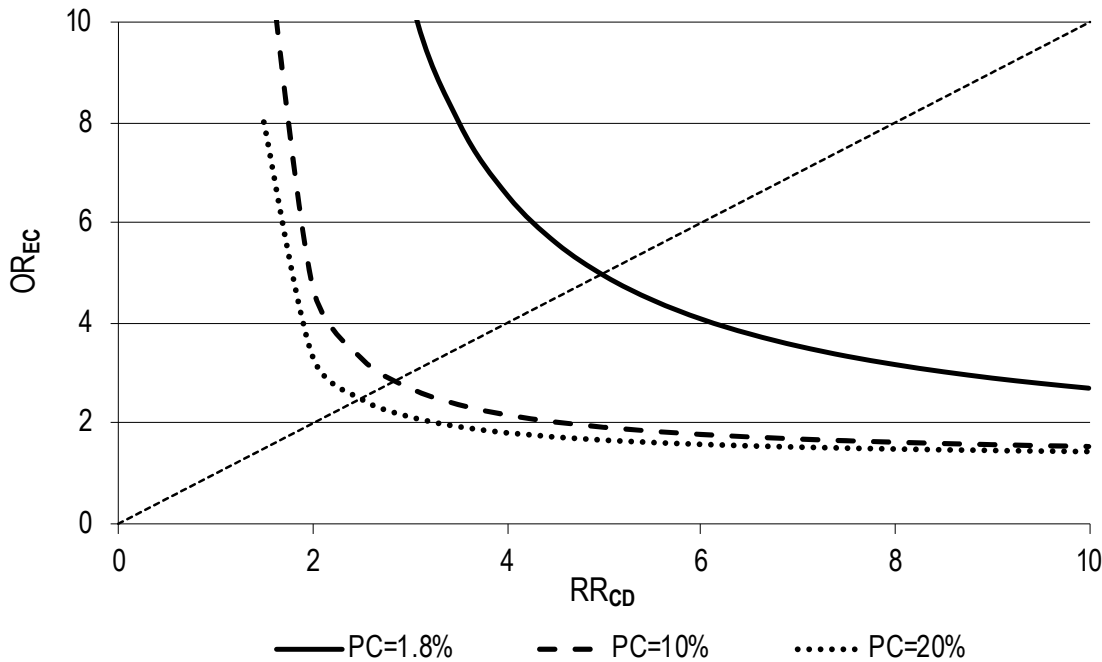

Fig 8 Cleft Palate

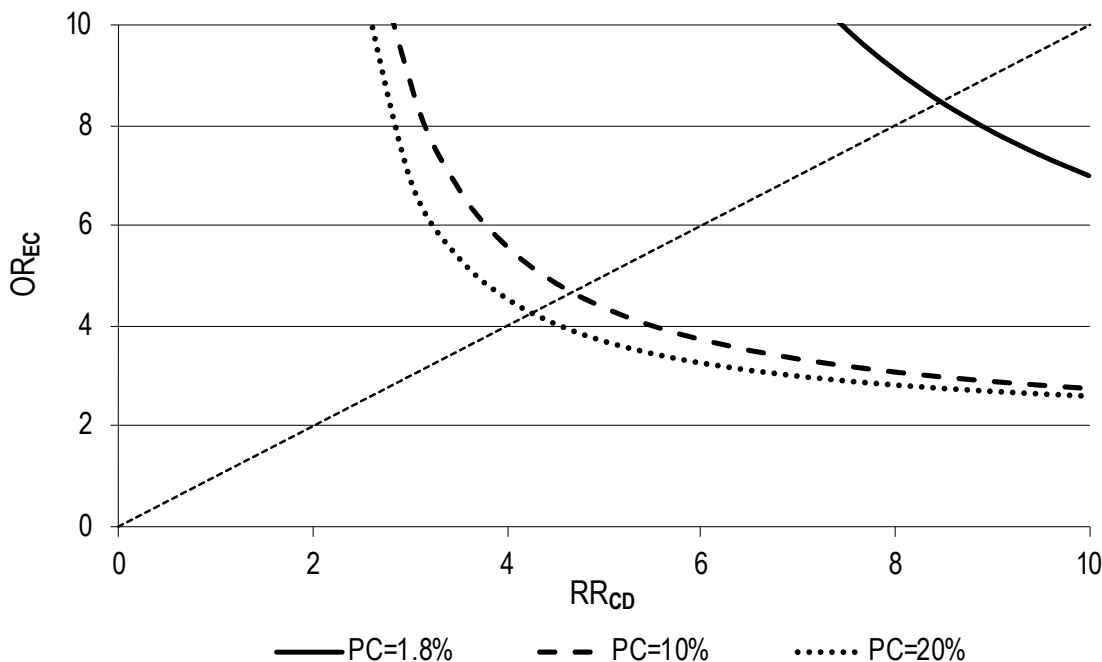

Note: Each line splits the area into two. The upper right area represents all combinations of an association between exposure and confounder (OR<sub>EC</sub>) and an association between confounder and outcome (RR<sub>CD</sub>) that would create confounding by an unmeasured factor strong enough to move the point estimate of RR to the null value (RR = 1) or beyond. The area to the lower left represents all parameter combinations that would not be able to move the estimated RR toward the null.

## References

1. Palmsten K, Huybrechts KF, Mogun H, Kowal MK, Williams PL, Michels KB, et al. Harnessing the Medicaid Analytic eXtract (MAX) to Evaluate Medications in Pregnancy: Design Considerations. *PLoS One*. 2013;8(6):e67405.
2. Huybrechts KF, Palmsten K, Avorn J, Cohen LS, Holmes LB, Franklin JM, et al. Antidepressant use in pregnancy and the risk of cardiac defects. *N Engl J Med*. 2014;370(25):2397-407.
3. Bateman BT, Hernandez-Diaz S, Fischer MA, Seely EW, Ecker JL, Franklin JM, et al. Statins and congenital malformations: cohort study. *BMJ*. 2015;350:h1035.
4. Bateman BT, Patomo E, Desai RJ, Seely EW, Mogun H, Dejene SZ, et al. Angiotensin-Converting Enzyme Inhibitors and the Risk of Congenital Malformations. *Obstet Gynecol*. 2017;129(1):174-84.
5. Patomo E, Huybrechts KF, Hernandez-Diaz S. Lithium Use in Pregnancy and the Risk of Cardiac Malformations. *N Engl J Med*. 2017;377(9):893-4.
6. Huybrechts KF, Hernández-Díaz S, Straub L, Gray KJ, Zhu Y, Patomo E, et al. Association of Maternal First-Trimester Ondansetron Use With Cardiac Malformations and Oral Clefts in Offspring. *JAMA*. 2018;320(23):2429-37.
7. Svensson E, Ehrenstein V, Norgaard M, Bakketeig LS, Rothman KJ, Sorensen HT, et al. Estimating the proportion of all observed birth defects occurring in pregnancies terminated by a second-trimester abortion. *Epidemiology*. 2014;25(6):866-71.
8. Hernandez-Diaz S, Huybrechts KF, Desai RJ, Cohen JM, Mogun H, Pennell PB, et al. Topiramate use early in pregnancy and the risk of oral clefts: A pregnancy cohort study. *Neurology*. 2018;90(4):e342-e51.
9. Drake P, Driscoll AK, Mathews TJ. Cigarette Smoking During Pregnancy: United States, 2016. *NCHS Data Brief*. 2018(305):1-8.
10. Walker AM. Observation and inference. An introduction to the methods of epidemiology: *Cancer Causes & Control*; 1992.
11. Schneeweiss S. Sensitivity analysis and external adjustment for unmeasured confounders in epidemiologic database studies of therapeutics. *Pharmacoepidemiol Drug Saf*. 2006;15(5):291-303.
12. Little J, Cardy A, Munger RG. Tobacco smoking and oral clefts: a meta-analysis. *Bull World Health Organ*. 2004;82(3):213-8.
